# Supplementary material for: Identifying species likely threatened by international trade on the IUCN Red List can inform CITES trade measures
Source: Research Square preprint supplement (doi:10.21203/rs.3.rs-1858556/v1), 2022-08-03
Supplement: Supplementary file 1 [file de5b4c88f02e21f7685dc1de.xlsx]

## Sheet: All coded species
Kingdom	Phylum	Class	Order	Family	species	International trade threat category	Threat category
ANIMALIA	ANNELIDA	CLITELLATA	ARHYNCHOBDELLIDA	HIRUDINIDAE	Hirudo medicinalis	I	NT
ANIMALIA	ANNELIDA	CLITELLATA	MEGADRILACEAE	CRIODRILIDAE	Criodrilus bathybates	I	NT
ANIMALIA	ANNELIDA	CLITELLATA	MEGADRILACEAE	LUMBRICIDAE	Eisenia anzac	U	CR
ANIMALIA	ANNELIDA	CLITELLATA	MEGADRILACEAE	MEGASCOLECIDAE	Amynthas gomejimensis	I	NT
ANIMALIA	ANNELIDA	CLITELLATA	MEGADRILACEAE	MEGASCOLECIDAE	Amynthas kunigamiensis	I	NT
ANIMALIA	ANNELIDA	CLITELLATA	MEGADRILACEAE	MEGASCOLECIDAE	Amynthas yamade	I	NT
ANIMALIA	ANNELIDA	CLITELLATA	MEGADRILACEAE	MEGASCOLECIDAE	Anisochaeta animae	I	VU
ANIMALIA	ANNELIDA	CLITELLATA	MEGADRILACEAE	MEGASCOLECIDAE	Aporodrilus mortenseni	I	CR
ANIMALIA	ANNELIDA	CLITELLATA	MEGADRILACEAE	MEGASCOLECIDAE	Diporochaeta chathamensis	I	VU
ANIMALIA	ANNELIDA	CLITELLATA	MEGADRILACEAE	MEGASCOLECIDAE	Diporochaeta pounamu	I	EN
ANIMALIA	ANNELIDA	CLITELLATA	MEGADRILACEAE	MEGASCOLECIDAE	Diporochaeta radula	I	EN
ANIMALIA	ANNELIDA	CLITELLATA	MEGADRILACEAE	MEGASCOLECIDAE	Manus koellikeri	I	NT
ANIMALIA	ANNELIDA	CLITELLATA	MEGADRILACEAE	MEGASCOLECIDAE	Metaphire parvula	I	NT
ANIMALIA	ANNELIDA	CLITELLATA	MEGADRILACEAE	MEGASCOLECIDAE	Metaphire riukiuensis	I	NT
ANIMALIA	ANNELIDA	CLITELLATA	MEGADRILACEAE	MEGASCOLECIDAE	Metaphire tanbode	I	NT
ANIMALIA	ANNELIDA	CLITELLATA	MEGADRILACEAE	MEGASCOLECIDAE	Perionychella ngakawau	I	CR
ANIMALIA	ANNELIDA	CLITELLATA	MEGADRILACEAE	MEGASCOLECIDAE	Tokea huttoni	I	EN
ANIMALIA	ANNELIDA	CLITELLATA	MEGADRILACEAE	MEGASCOLECIDAE	Tokea kirki	I	EN
ANIMALIA	ANNELIDA	CLITELLATA	MEGADRILACEAE	MEGASCOLECIDAE	Tokea unipapillata	U	EN
ANIMALIA	ANNELIDA	CLITELLATA	MEGADRILACEAE	MEGASCOLECIDAE	Zacharius obo	I	EN
ANIMALIA	ANNELIDA	CLITELLATA	MEGADRILACEAE	MONILIGASTRIDAE	Drawida moriokaensis	I	EN
ANIMALIA	ANNELIDA	CLITELLATA	OPISTHOPORA	ACANTHODRILIDAE	Acanthodrilus kermadecensis	I	VU
ANIMALIA	ANNELIDA	CLITELLATA	OPISTHOPORA	ACANTHODRILIDAE	Decachaetus erici	I	VU
ANIMALIA	ANNELIDA	CLITELLATA	OPISTHOPORA	ACANTHODRILIDAE	Decachaetus minor	I	VU
ANIMALIA	ANNELIDA	CLITELLATA	OPISTHOPORA	ACANTHODRILIDAE	Diplotrema bilboi	I	VU
ANIMALIA	ANNELIDA	CLITELLATA	OPISTHOPORA	ACANTHODRILIDAE	Maoridrilus felix	I	CR
ANIMALIA	ANNELIDA	CLITELLATA	OPISTHOPORA	ACANTHODRILIDAE	Maoridrilus smithi	I	NT
ANIMALIA	ANNELIDA	CLITELLATA	OPISTHOPORA	OCTOCHAETIDAE	Deinodrilus gorgon	I	EN
ANIMALIA	ANNELIDA	CLITELLATA	OPISTHOPORA	OCTOCHAETIDAE	Deinodrilus medusa	I	EN
ANIMALIA	ANNELIDA	CLITELLATA	OPISTHOPORA	OCTOCHAETIDAE	Hoplochaetina durvilleana	I	NT
ANIMALIA	ANNELIDA	CLITELLATA	OPISTHOPORA	OCTOCHAETIDAE	Octochaetus diememoratio	I	EN
ANIMALIA	ANNELIDA	CLITELLATA	OPISTHOPORA	OCTOCHAETIDAE	Octochaetus kenleei	I	EN
ANIMALIA	ANNELIDA	CLITELLATA	OPISTHOPORA	OCTOCHAETIDAE	Octochaetus levis	I	CR
ANIMALIA	ANNELIDA	CLITELLATA	OPISTHOPORA	OCTOCHAETIDAE	Octochaetus microchaetus	I	CR
ANIMALIA	ARTHROPODA	ARACHNIDA	ARANEAE	GNAPHOSIDAE	Benoitodes caheni	U	CR
ANIMALIA	ARTHROPODA	ARACHNIDA	ARANEAE	GNAPHOSIDAE	Gnaphosa funerea	U	CR
ANIMALIA	ARTHROPODA	ARACHNIDA	ARANEAE	LINYPHIIDAE	Nothophantes horridus	U	CR
ANIMALIA	ARTHROPODA	ARACHNIDA	ARANEAE	LIPHISTIIDAE	Liphistius kanthan	U	CR
ANIMALIA	ARTHROPODA	ARACHNIDA	ARANEAE	LYCOSIDAE	Hogna inexorabilis	U	EN
ANIMALIA	ARTHROPODA	ARACHNIDA	ARANEAE	LYCOSIDAE	Hogna ingens	I	CR
ANIMALIA	ARTHROPODA	ARACHNIDA	ARANEAE	OONOPIDAE	Brignolia bowleri	U	NT
ANIMALIA	ARTHROPODA	ARACHNIDA	ARANEAE	OONOPIDAE	Gamasomorpha austera	U	CR
ANIMALIA	ARTHROPODA	ARACHNIDA	ARANEAE	SALTICIDAE	Baviola luteosignata	U	EN
ANIMALIA	ARTHROPODA	ARACHNIDA	ARANEAE	SALTICIDAE	Sadies trifasciata	U	EN
ANIMALIA	ARTHROPODA	ARACHNIDA	ARANEAE	SCYTODIDAE	Scytodes pholcoides	U	EN
ANIMALIA	ARTHROPODA	ARACHNIDA	ARANEAE	SYMPHYTOGNATHIDAE	Anapistula ataecina	U	CR
ANIMALIA	ARTHROPODA	ARACHNIDA	ARANEAE	TELEMIDAE	Seychellia lodoiceae	U	CR
ANIMALIA	ARTHROPODA	ARACHNIDA	ARANEAE	THERAPHOSIDAE	Brachypelma auratum	L	NT
ANIMALIA	ARTHROPODA	ARACHNIDA	ARANEAE	THERAPHOSIDAE	Brachypelma baumgarteni	L	EN
ANIMALIA	ARTHROPODA	ARACHNIDA	ARANEAE	THERAPHOSIDAE	Brachypelma boehmei	L	EN
ANIMALIA	ARTHROPODA	ARACHNIDA	ARANEAE	THERAPHOSIDAE	Brachypelma hamorii	L	VU
ANIMALIA	ARTHROPODA	ARACHNIDA	ARANEAE	THERAPHOSIDAE	Brachypelma klaasi	L	NT
ANIMALIA	ARTHROPODA	ARACHNIDA	ARANEAE	THERAPHOSIDAE	Brachypelma schroederi	L	EN
ANIMALIA	ARTHROPODA	ARACHNIDA	ARANEAE	THERAPHOSIDAE	Brachypelma smithi	L	NT
ANIMALIA	ARTHROPODA	ARACHNIDA	ARANEAE	THERAPHOSIDAE	Brachypelma verdezi	L	NT
ANIMALIA	ARTHROPODA	ARACHNIDA	ARANEAE	THERAPHOSIDAE	Grammostola vachoni	L	VU
ANIMALIA	ARTHROPODA	ARACHNIDA	ARANEAE	THERAPHOSIDAE	Haploclastus kayi	L	EN
ANIMALIA	ARTHROPODA	ARACHNIDA	ARANEAE	THERAPHOSIDAE	Poecilotheria formosa	L	EN
ANIMALIA	ARTHROPODA	ARACHNIDA	ARANEAE	THERAPHOSIDAE	Poecilotheria hanumavilasumica	L	CR
ANIMALIA	ARTHROPODA	ARACHNIDA	ARANEAE	THERAPHOSIDAE	Poecilotheria metallica	L	CR
ANIMALIA	ARTHROPODA	ARACHNIDA	ARANEAE	THERAPHOSIDAE	Poecilotheria miranda	L	EN
ANIMALIA	ARTHROPODA	ARACHNIDA	ARANEAE	THERAPHOSIDAE	Poecilotheria rufilata	L	EN
ANIMALIA	ARTHROPODA	ARACHNIDA	ARANEAE	THERAPHOSIDAE	Poecilotheria striata	L	VU
ANIMALIA	ARTHROPODA	ARACHNIDA	ARANEAE	THERAPHOSIDAE	Thrigmopoeus insignis	L	VU
ANIMALIA	ARTHROPODA	ARACHNIDA	ARANEAE	THERAPHOSIDAE	Thrigmopoeus truculentus	L	NT
ANIMALIA	ARTHROPODA	ARACHNIDA	ARANEAE	THOMISIDAE	Bonapruncinia sanctaehelenae	U	CR
ANIMALIA	ARTHROPODA	ARACHNIDA	OPILIONES	BIANTIDAE	Biantes albimanus	U	EN
ANIMALIA	ARTHROPODA	ARACHNIDA	OPILIONES	ONCOPODIDAE	Gnomulus bedoharvengorum	U	EN
ANIMALIA	ARTHROPODA	ARACHNIDA	OPILIONES	PODOCTIDAE	Ibalonius lomani	U	CR
ANIMALIA	ARTHROPODA	ARACHNIDA	OPILIONES	PODOCTIDAE	Sitalcicus incertus	U	CR
ANIMALIA	ARTHROPODA	ARACHNIDA	OPILIONES	SAMOIDAE	Mitraceras crassipalpum	U	CR
ANIMALIA	ARTHROPODA	ARACHNIDA	ORIBATIDA	SCHELORIBATIDAE	Scheloribates evanescens	U	EN
ANIMALIA	ARTHROPODA	ARACHNIDA	PSEUDOSCORPIONES	GARYPIDAE	Garypus titanius	U	CR
ANIMALIA	ARTHROPODA	ARACHNIDA	PSEUDOSCORPIONES	GEOGARYPIDAE	Afrogarypus seychellesensis	U	CR
ANIMALIA	ARTHROPODA	ARACHNIDA	SCORPIONES	BUTHIDAE	Isometrus deharvengi	U	EN
ANIMALIA	ARTHROPODA	ARACHNIDA	SCORPIONES	LIOCHELIDAE	Chiromachus ochropus	U	VU
ANIMALIA	ARTHROPODA	BRANCHIOPODA	ANOSTRACA	CHIROCEPHALIDAE	Dexteria floridana	U	CR
ANIMALIA	ARTHROPODA	BRANCHIOPODA	ANOSTRACA	STREPTOCEPHALIDAE	Streptocephalus gracilis	U	CR
ANIMALIA	ARTHROPODA	DIPLOPODA	POLYDESMIDA	PARADOXOSOMATIDAE	Diglossosternoides curiosus	U	CR
ANIMALIA	ARTHROPODA	DIPLOPODA	POLYZONIIDA	SIPHONOTIDAE	Rhinotus albifrons	U	CR
ANIMALIA	ARTHROPODA	DIPLOPODA	SPHAEROTHERIIDA	ARTHROSPHAERIDAE	Sphaeromimus andohahela	U	NT
ANIMALIA	ARTHROPODA	DIPLOPODA	SPHAEROTHERIIDA	ARTHROSPHAERIDAE	Sphaeromimus lavasoa	U	CR
ANIMALIA	ARTHROPODA	DIPLOPODA	SPHAEROTHERIIDA	ARTHROSPHAERIDAE	Sphaeromimus saintelucei	U	CR
ANIMALIA	ARTHROPODA	DIPLOPODA	SPHAEROTHERIIDA	ARTHROSPHAERIDAE	Sphaeromimus splendidus	U	CR
ANIMALIA	ARTHROPODA	DIPLOPODA	SPHAEROTHERIIDA	ARTHROSPHAERIDAE	Zoosphaerium alluaudi	U	CR
ANIMALIA	ARTHROPODA	DIPLOPODA	SPHAEROTHERIIDA	ARTHROSPHAERIDAE	Zoosphaerium analavelona	U	NT
ANIMALIA	ARTHROPODA	DIPLOPODA	SPHAEROTHERIIDA	ARTHROSPHAERIDAE	Zoosphaerium arborealis	U	EN
ANIMALIA	ARTHROPODA	DIPLOPODA	SPHAEROTHERIIDA	ARTHROSPHAERIDAE	Zoosphaerium endemicum	U	NT
ANIMALIA	ARTHROPODA	DIPLOPODA	SPHAEROTHERIIDA	ARTHROSPHAERIDAE	Zoosphaerium fisheri	U	NT
ANIMALIA	ARTHROPODA	DIPLOPODA	SPHAEROTHERIIDA	ARTHROSPHAERIDAE	Zoosphaerium haackeri	U	NT
ANIMALIA	ARTHROPODA	DIPLOPODA	SPHAEROTHERIIDA	ARTHROSPHAERIDAE	Zoosphaerium mitoho	U	NT
ANIMALIA	ARTHROPODA	DIPLOPODA	SPHAEROTHERIIDA	ARTHROSPHAERIDAE	Zoosphaerium muscorum	U	NT
ANIMALIA	ARTHROPODA	DIPLOPODA	SPHAEROTHERIIDA	ARTHROSPHAERIDAE	Zoosphaerium pseudoplatylabum	U	NT
ANIMALIA	ARTHROPODA	DIPLOPODA	SPHAEROTHERIIDA	ARTHROSPHAERIDAE	Zoosphaerium pseudopriapus	U	VU
ANIMALIA	ARTHROPODA	DIPLOPODA	SPHAEROTHERIIDA	ARTHROSPHAERIDAE	Zoosphaerium smaragdinum	U	NT
ANIMALIA	ARTHROPODA	DIPLOPODA	SPHAEROTHERIIDA	ARTHROSPHAERIDAE	Zoosphaerium solitarium	U	EN
ANIMALIA	ARTHROPODA	DIPLOPODA	SPHAEROTHERIIDA	ARTHROSPHAERIDAE	Zoosphaerium tainkintana	U	EN
ANIMALIA	ARTHROPODA	DIPLOPODA	SPHAEROTHERIIDA	ARTHROSPHAERIDAE	Zoosphaerium tampolo	U	CR
ANIMALIA	ARTHROPODA	DIPLOPODA	SPHAEROTHERIIDA	ARTHROSPHAERIDAE	Zoosphaerium trichordum	U	VU
ANIMALIA	ARTHROPODA	DIPLOPODA	SPHAEROTHERIIDA	ARTHROSPHAERIDAE	Zoosphaerium viridissimum	U	NT
ANIMALIA	ARTHROPODA	DIPLOPODA	SPIROBOLIDA	PACHYBOLIDAE	Alluviobolus antanosy	U	EN
ANIMALIA	ARTHROPODA	DIPLOPODA	SPIROBOLIDA	PACHYBOLIDAE	Alluviobolus laticlavius	U	CR
ANIMALIA	ARTHROPODA	DIPLOPODA	SPIROBOLIDA	PACHYBOLIDAE	Aphistogoniulus corallipes	U	CR
ANIMALIA	ARTHROPODA	DIPLOPODA	SPIROBOLIDA	PACHYBOLIDAE	Aphistogoniulus diabolicus	U	NT
ANIMALIA	ARTHROPODA	DIPLOPODA	SPIROBOLIDA	PACHYBOLIDAE	Aphistogoniulus infernalis	U	EN
ANIMALIA	ARTHROPODA	DIPLOPODA	SPIROBOLIDA	PACHYBOLIDAE	Aphistogoniulus rubrodorsalis	U	NT
ANIMALIA	ARTHROPODA	DIPLOPODA	SPIROBOLIDA	PACHYBOLIDAE	Aphistogoniulus sanguineus	U	EN
ANIMALIA	ARTHROPODA	DIPLOPODA	SPIROBOLIDA	PACHYBOLIDAE	Colossobolus aculeatus	U	EN
ANIMALIA	ARTHROPODA	DIPLOPODA	SPIROBOLIDA	PACHYBOLIDAE	Colossobolus litoralis	U	CR
ANIMALIA	ARTHROPODA	DIPLOPODA	SPIROBOLIDA	PACHYBOLIDAE	Colossobolus semicyclus	U	EN
ANIMALIA	ARTHROPODA	DIPLOPODA	SPIROBOLIDA	PACHYBOLIDAE	Granitobolus andohahelensis	U	NT
ANIMALIA	ARTHROPODA	DIPLOPODA	SPIROBOLIDA	PACHYBOLIDAE	Ostinobolus rufus	U	NT
ANIMALIA	ARTHROPODA	DIPLOPODA	SPIROBOLIDA	PACHYBOLIDAE	Spiromimus namoroka	U	VU
ANIMALIA	ARTHROPODA	DIPLOPODA	SPIROBOLIDA	PACHYBOLIDAE	Spiromimus scapularis	U	CR
ANIMALIA	ARTHROPODA	DIPLOPODA	SPIROBOLIDA	PACHYBOLIDAE	Spiromimus simplex	U	NT
ANIMALIA	ARTHROPODA	DIPLOPODA	SPIROBOLIDA	PACHYBOLIDAE	Spiromimus triaureus	U	NT
ANIMALIA	ARTHROPODA	DIPLOPODA	SPIROBOLIDA	PACHYBOLIDAE	Zehntnerobolus rubripes	U	NT
ANIMALIA	ARTHROPODA	DIPLOPODA	SPIROBOLIDA	SPIROBOLELIIDAE	Hylekobolus analavelona	U	NT
ANIMALIA	ARTHROPODA	DIPLOPODA	SPIROBOLIDA	SPIROBOLELIIDAE	Hylekobolus latifrons	U	CR
ANIMALIA	ARTHROPODA	DIPLOPODA	SPIROBOLIDA	SPIROBOLELIIDAE	Hylekobolus marojejy	U	NT
ANIMALIA	ARTHROPODA	DIPLOPODA	SPIROBOLIDA	SPIROBOLELIIDAE	Hylekobolus montanus	U	NT
ANIMALIA	ARTHROPODA	DIPLOPODA	SPIROBOLIDA	SPIROBOLELIIDAE	Spirobolellus simplex	U	CR
ANIMALIA	ARTHROPODA	DIPLOPODA	SPIROSTREPTIDA	SPIROSTREPTIDAE	Doratogonus barbatus	U	VU
ANIMALIA	ARTHROPODA	DIPLOPODA	SPIROSTREPTIDA	SPIROSTREPTIDAE	Doratogonus furculifer	U	EN
ANIMALIA	ARTHROPODA	DIPLOPODA	SPIROSTREPTIDA	SPIROSTREPTIDAE	Doratogonus herberti	U	VU
ANIMALIA	ARTHROPODA	DIPLOPODA	SPIROSTREPTIDA	SPIROSTREPTIDAE	Doratogonus hoffmani	U	VU
ANIMALIA	ARTHROPODA	DIPLOPODA	SPIROSTREPTIDA	SPIROSTREPTIDAE	Doratogonus infragilis	U	EN
ANIMALIA	ARTHROPODA	DIPLOPODA	SPIROSTREPTIDA	SPIROSTREPTIDAE	Doratogonus major	U	CR
ANIMALIA	ARTHROPODA	DIPLOPODA	SPIROSTREPTIDA	SPIROSTREPTIDAE	Doratogonus meridionalis	U	VU
ANIMALIA	ARTHROPODA	DIPLOPODA	SPIROSTREPTIDA	SPIROSTREPTIDAE	Doratogonus natalensis	U	VU
ANIMALIA	ARTHROPODA	DIPLOPODA	SPIROSTREPTIDA	SPIROSTREPTIDAE	Doratogonus precarius	U	VU
ANIMALIA	ARTHROPODA	DIPLOPODA	SPIROSTREPTIDA	SPIROSTREPTIDAE	Doratogonus rubipodus	U	EN
ANIMALIA	ARTHROPODA	DIPLOPODA	SPIROSTREPTIDA	SPIROSTREPTIDAE	Doratogonus zuluensis	U	EN
ANIMALIA	ARTHROPODA	ENTOGNATHA	COLLEMBOLA	HYPOGASTRURIDAE	Ceratophysella sp. nov. 'HC'	U	CR
ANIMALIA	ARTHROPODA	INSECTA	BLATTODEA	BLATTELLIDAE	Sliferia similis	U	CR
ANIMALIA	ARTHROPODA	INSECTA	BLATTODEA	BLATTELLIDAE	Theganopteryx minuta	U	EN
ANIMALIA	ARTHROPODA	INSECTA	BLATTODEA	BLATTELLIDAE	Theganopteryx scotti	U	CR
ANIMALIA	ARTHROPODA	INSECTA	COLEOPTERA	ANOBIIDAE	Xyletinus tremulicola	U	NT
ANIMALIA	ARTHROPODA	INSECTA	COLEOPTERA	ANTHRIBIDAE	Acarodes gutta	U	EN
ANIMALIA	ARTHROPODA	INSECTA	COLEOPTERA	ANTHRIBIDAE	Homoeodera asteris	U	CR
ANIMALIA	ARTHROPODA	INSECTA	COLEOPTERA	ANTHRIBIDAE	Homoeodera longefasciata	U	CR
ANIMALIA	ARTHROPODA	INSECTA	COLEOPTERA	ANTHRIBIDAE	Homoeodera nodulipennis	U	CR
ANIMALIA	ARTHROPODA	INSECTA	COLEOPTERA	ANTHRIBIDAE	Homoeodera paivae	U	CR
ANIMALIA	ARTHROPODA	INSECTA	COLEOPTERA	ANTHRIBIDAE	Valenfriesia rotundata	U	CR
ANIMALIA	ARTHROPODA	INSECTA	COLEOPTERA	BOSTRICHIDAE	Stephanopachys brunneus	U	NT
ANIMALIA	ARTHROPODA	INSECTA	COLEOPTERA	BUPRESTIDAE	Buprestis splendens	I	EN
ANIMALIA	ARTHROPODA	INSECTA	COLEOPTERA	CARABIDAE	Dongodytes baxian	U	NT
ANIMALIA	ARTHROPODA	INSECTA	COLEOPTERA	CARABIDAE	Microblemus rieae	U	NT
ANIMALIA	ARTHROPODA	INSECTA	COLEOPTERA	CERAMBYCIDAE	Anaglyptus luteofasciatus	U	EN
ANIMALIA	ARTHROPODA	INSECTA	COLEOPTERA	CERAMBYCIDAE	Anaglyptus praecellens	U	EN
ANIMALIA	ARTHROPODA	INSECTA	COLEOPTERA	CERAMBYCIDAE	Anisarthron barbipes	I	VU
ANIMALIA	ARTHROPODA	INSECTA	COLEOPTERA	CERAMBYCIDAE	Blabinotus spinicollis	U	NT
ANIMALIA	ARTHROPODA	INSECTA	COLEOPTERA	CERAMBYCIDAE	Calchaenesthes sexmaculata	U	NT
ANIMALIA	ARTHROPODA	INSECTA	COLEOPTERA	CERAMBYCIDAE	Callidium cedri	U	VU
ANIMALIA	ARTHROPODA	INSECTA	COLEOPTERA	CERAMBYCIDAE	Chlorophorus favieri	U	NT
ANIMALIA	ARTHROPODA	INSECTA	COLEOPTERA	CERAMBYCIDAE	Clytus clavicornis	U	VU
ANIMALIA	ARTHROPODA	INSECTA	COLEOPTERA	CERAMBYCIDAE	Clytus triangulimacula	U	VU
ANIMALIA	ARTHROPODA	INSECTA	COLEOPTERA	CERAMBYCIDAE	Crotchiella brachyptera	U	EN
ANIMALIA	ARTHROPODA	INSECTA	COLEOPTERA	CERAMBYCIDAE	Delagrangeus schurmanni	U	VU
ANIMALIA	ARTHROPODA	INSECTA	COLEOPTERA	CERAMBYCIDAE	Drymochares cylindraceus	U	EN
ANIMALIA	ARTHROPODA	INSECTA	COLEOPTERA	CERAMBYCIDAE	Drymochares truquii	U	EN
ANIMALIA	ARTHROPODA	INSECTA	COLEOPTERA	CERAMBYCIDAE	Grammoptera viridipennis	U	VU
ANIMALIA	ARTHROPODA	INSECTA	COLEOPTERA	CERAMBYCIDAE	Isotomus barbarae	U	VU
ANIMALIA	ARTHROPODA	INSECTA	COLEOPTERA	CERAMBYCIDAE	Isotomus jarmilae	U	EN
ANIMALIA	ARTHROPODA	INSECTA	COLEOPTERA	CERAMBYCIDAE	Isotomus theresae	U	EN
ANIMALIA	ARTHROPODA	INSECTA	COLEOPTERA	CERAMBYCIDAE	Neomarius gandolphii	U	EN
ANIMALIA	ARTHROPODA	INSECTA	COLEOPTERA	CERAMBYCIDAE	Neopiciella sicula	U	VU
ANIMALIA	ARTHROPODA	INSECTA	COLEOPTERA	CERAMBYCIDAE	Pedostrangalia revestita	U	VU
ANIMALIA	ARTHROPODA	INSECTA	COLEOPTERA	CERAMBYCIDAE	Pseudogaurotina excellens	L	EN
ANIMALIA	ARTHROPODA	INSECTA	COLEOPTERA	CERAMBYCIDAE	Ropalopus insubricus	U	NT
ANIMALIA	ARTHROPODA	INSECTA	COLEOPTERA	CERAMBYCIDAE	Ropalopus siculus	U	NT
ANIMALIA	ARTHROPODA	INSECTA	COLEOPTERA	CERAMBYCIDAE	Ropalopus ungaricus	U	EN
ANIMALIA	ARTHROPODA	INSECTA	COLEOPTERA	CERAMBYCIDAE	Schurmannia sicula	U	CR
ANIMALIA	ARTHROPODA	INSECTA	COLEOPTERA	CERAMBYCIDAE	Semanotus algiricus	U	EN
ANIMALIA	ARTHROPODA	INSECTA	COLEOPTERA	CERAMBYCIDAE	Stictoleptura palmi	U	NT
ANIMALIA	ARTHROPODA	INSECTA	COLEOPTERA	CERAMBYCIDAE	Trichoferus bergeri	U	CR
ANIMALIA	ARTHROPODA	INSECTA	COLEOPTERA	CERAMBYCIDAE	Vesperella maroccana	U	EN
ANIMALIA	ARTHROPODA	INSECTA	COLEOPTERA	CETONIIDAE	Chromovalgus peyroni	U	VU
ANIMALIA	ARTHROPODA	INSECTA	COLEOPTERA	CETONIIDAE	Gnorimus decempunctatus	I	EN
ANIMALIA	ARTHROPODA	INSECTA	COLEOPTERA	CETONIIDAE	Osmoderma barnabita	I	NT
ANIMALIA	ARTHROPODA	INSECTA	COLEOPTERA	CETONIIDAE	Osmoderma cristinae	I	EN
ANIMALIA	ARTHROPODA	INSECTA	COLEOPTERA	CETONIIDAE	Osmoderma eremita	U	NT
ANIMALIA	ARTHROPODA	INSECTA	COLEOPTERA	CETONIIDAE	Osmoderma italica	U	EN
ANIMALIA	ARTHROPODA	INSECTA	COLEOPTERA	CETONIIDAE	Osmoderma lassallei	U	EN
ANIMALIA	ARTHROPODA	INSECTA	COLEOPTERA	CETONIIDAE	Trichius orientalis	U	NT
ANIMALIA	ARTHROPODA	INSECTA	COLEOPTERA	CICINDELIDAE	Cicindela albissima	I	CR
ANIMALIA	ARTHROPODA	INSECTA	COLEOPTERA	CLERIDAE	Enoplium doderoi	U	VU
ANIMALIA	ARTHROPODA	INSECTA	COLEOPTERA	CLERIDAE	Thanasimodes dorsalis	U	VU
ANIMALIA	ARTHROPODA	INSECTA	COLEOPTERA	CUCUJIDAE	Cucujus cinnaberinus	U	NT
ANIMALIA	ARTHROPODA	INSECTA	COLEOPTERA	CUCUJIDAE	Cucujus tulliae	U	EN
ANIMALIA	ARTHROPODA	INSECTA	COLEOPTERA	CURCULIONIDAE	Hadramphus tuberculatus	U	CR
ANIMALIA	ARTHROPODA	INSECTA	COLEOPTERA	ELATERIDAE	Ampedus assingi	U	EN
ANIMALIA	ARTHROPODA	INSECTA	COLEOPTERA	ELATERIDAE	Ampedus brunnicornis	U	VU
ANIMALIA	ARTHROPODA	INSECTA	COLEOPTERA	ELATERIDAE	Ampedus cardinalis	U	NT
ANIMALIA	ARTHROPODA	INSECTA	COLEOPTERA	ELATERIDAE	Ampedus carinthiacus	U	NT
ANIMALIA	ARTHROPODA	INSECTA	COLEOPTERA	ELATERIDAE	Ampedus coenobita	U	NT
ANIMALIA	ARTHROPODA	INSECTA	COLEOPTERA	ELATERIDAE	Ampedus corsicus	I	VU
ANIMALIA	ARTHROPODA	INSECTA	COLEOPTERA	ELATERIDAE	Ampedus hjorti	U	VU
ANIMALIA	ARTHROPODA	INSECTA	COLEOPTERA	ELATERIDAE	Ampedus melonii	U	NT
ANIMALIA	ARTHROPODA	INSECTA	COLEOPTERA	ELATERIDAE	Ampedus quadrisignatus	I	EN
ANIMALIA	ARTHROPODA	INSECTA	COLEOPTERA	ELATERIDAE	Brachygonus meraculus	U	NT
ANIMALIA	ARTHROPODA	INSECTA	COLEOPTERA	ELATERIDAE	Crepidophorus mutilatus	U	NT
ANIMALIA	ARTHROPODA	INSECTA	COLEOPTERA	ELATERIDAE	Limoniscus violaceus	U	EN
ANIMALIA	ARTHROPODA	INSECTA	COLEOPTERA	ELATERIDAE	Reitterelater bouyoni	U	NT
ANIMALIA	ARTHROPODA	INSECTA	COLEOPTERA	ELATERIDAE	Stenagostus sardiniensis	I	EN
ANIMALIA	ARTHROPODA	INSECTA	COLEOPTERA	EROTYLIDAE	Triplax castanea	U	EN
ANIMALIA	ARTHROPODA	INSECTA	COLEOPTERA	EROTYLIDAE	Triplax emgei	U	EN
ANIMALIA	ARTHROPODA	INSECTA	COLEOPTERA	EUCHIRIDAE	Propomacrus cypriacus	U	CR
ANIMALIA	ARTHROPODA	INSECTA	COLEOPTERA	EUCNEMIDAE	Hylis simonae	U	NT
ANIMALIA	ARTHROPODA	INSECTA	COLEOPTERA	EUCNEMIDAE	Melasis fermini	U	VU
ANIMALIA	ARTHROPODA	INSECTA	COLEOPTERA	EUCNEMIDAE	Microrhagus pyrenaeus	U	NT
ANIMALIA	ARTHROPODA	INSECTA	COLEOPTERA	EUCNEMIDAE	Xylophilus testaceus	U	NT
ANIMALIA	ARTHROPODA	INSECTA	COLEOPTERA	GEOTRUPIDAE	Ceratophyus martinezi	L	EN
ANIMALIA	ARTHROPODA	INSECTA	COLEOPTERA	GEOTRUPIDAE	Ceratophyus rossii	L	EN
ANIMALIA	ARTHROPODA	INSECTA	COLEOPTERA	GEOTRUPIDAE	Thorectes balearicus	U	EN
ANIMALIA	ARTHROPODA	INSECTA	COLEOPTERA	GEOTRUPIDAE	Thorectes chersinus	U	EN
ANIMALIA	ARTHROPODA	INSECTA	COLEOPTERA	GEOTRUPIDAE	Thorectes marginatus	U	NT
ANIMALIA	ARTHROPODA	INSECTA	COLEOPTERA	GEOTRUPIDAE	Thorectes sardous	U	EN
ANIMALIA	ARTHROPODA	INSECTA	COLEOPTERA	GEOTRUPIDAE	Typhaeus hiostius	U	EN
ANIMALIA	ARTHROPODA	INSECTA	COLEOPTERA	LEIODIDAE	Agathidium pulchellum	U	NT
ANIMALIA	ARTHROPODA	INSECTA	COLEOPTERA	LUCANIDAE	Ceruchus chrysomelinus	U	NT
ANIMALIA	ARTHROPODA	INSECTA	COLEOPTERA	LUCANIDAE	Dorcus alexisi	U	EN
ANIMALIA	ARTHROPODA	INSECTA	COLEOPTERA	LUCANIDAE	Dorcus musimon	I	VU
ANIMALIA	ARTHROPODA	INSECTA	COLEOPTERA	LUCANIDAE	Lucanus busignyi	I	VU
ANIMALIA	ARTHROPODA	INSECTA	COLEOPTERA	MYCETOPHAGIDAE	Esarcus abeillei	U	NT
ANIMALIA	ARTHROPODA	INSECTA	COLEOPTERA	MYCETOPHAGIDAE	Esarcus franzi	U	VU
ANIMALIA	ARTHROPODA	INSECTA	COLEOPTERA	MYCETOPHAGIDAE	Esarcus leprieuri	U	NT
ANIMALIA	ARTHROPODA	INSECTA	COLEOPTERA	MYCETOPHAGIDAE	Pseudotriphyllus suturalis	U	NT
ANIMALIA	ARTHROPODA	INSECTA	COLEOPTERA	OEDEMERIDAE	Nacerdes hesperica	U	NT
ANIMALIA	ARTHROPODA	INSECTA	COLEOPTERA	OEDEMERIDAE	Sparedrus lencinae	U	NT
ANIMALIA	ARTHROPODA	INSECTA	COLEOPTERA	SCARABAEIDAE	Anonychonitis freyi	I	NT
ANIMALIA	ARTHROPODA	INSECTA	COLEOPTERA	SCARABAEIDAE	Ateuchetus cicatricosus	I	NT
ANIMALIA	ARTHROPODA	INSECTA	COLEOPTERA	SCARABAEIDAE	Ateuchetus semipunctatus	I	VU
ANIMALIA	ARTHROPODA	INSECTA	COLEOPTERA	SCARABAEIDAE	Ateuchus ambiguus	U	EN
ANIMALIA	ARTHROPODA	INSECTA	COLEOPTERA	SCARABAEIDAE	Ateuchus halffteri	U	NT
ANIMALIA	ARTHROPODA	INSECTA	COLEOPTERA	SCARABAEIDAE	Ateuchus squalidus	U	VU
ANIMALIA	ARTHROPODA	INSECTA	COLEOPTERA	SCARABAEIDAE	Bdelyropsis newtoni	U	NT
ANIMALIA	ARTHROPODA	INSECTA	COLEOPTERA	SCARABAEIDAE	Canthon corpulentus	U	VU
ANIMALIA	ARTHROPODA	INSECTA	COLEOPTERA	SCARABAEIDAE	Canthon quadripunctatus	U	VU
ANIMALIA	ARTHROPODA	INSECTA	COLEOPTERA	SCARABAEIDAE	Canthon zuninoi	U	VU
ANIMALIA	ARTHROPODA	INSECTA	COLEOPTERA	SCARABAEIDAE	Canthonella gomezi	U	EN
ANIMALIA	ARTHROPODA	INSECTA	COLEOPTERA	SCARABAEIDAE	Cheirotonus jambar	U	EN
ANIMALIA	ARTHROPODA	INSECTA	COLEOPTERA	SCARABAEIDAE	Clypeodrepanus striatus	U	VU
ANIMALIA	ARTHROPODA	INSECTA	COLEOPTERA	SCARABAEIDAE	Cryptocanthon altus	U	EN
ANIMALIA	ARTHROPODA	INSECTA	COLEOPTERA	SCARABAEIDAE	Cryptocanthon foveatus	U	NT
ANIMALIA	ARTHROPODA	INSECTA	COLEOPTERA	SCARABAEIDAE	Cryptocanthon genieri	U	NT
ANIMALIA	ARTHROPODA	INSECTA	COLEOPTERA	SCARABAEIDAE	Cryptocanthon lobatus	U	NT
ANIMALIA	ARTHROPODA	INSECTA	COLEOPTERA	SCARABAEIDAE	Cryptocanthon nebulinus	U	EN
ANIMALIA	ARTHROPODA	INSECTA	COLEOPTERA	SCARABAEIDAE	Cryptocanthon punctatus	U	EN
ANIMALIA	ARTHROPODA	INSECTA	COLEOPTERA	SCARABAEIDAE	Dichotomius eucranioides	U	EN
ANIMALIA	ARTHROPODA	INSECTA	COLEOPTERA	SCARABAEIDAE	Dichotomius schiffleri	U	EN
ANIMALIA	ARTHROPODA	INSECTA	COLEOPTERA	SCARABAEIDAE	Endroedyolus paradoxus	U	EN
ANIMALIA	ARTHROPODA	INSECTA	COLEOPTERA	SCARABAEIDAE	Genieridium medinae	U	NT
ANIMALIA	ARTHROPODA	INSECTA	COLEOPTERA	SCARABAEIDAE	Gymnopleurus sturmi	I	NT
ANIMALIA	ARTHROPODA	INSECTA	COLEOPTERA	SCARABAEIDAE	Gyronotus dispar	U	NT
ANIMALIA	ARTHROPODA	INSECTA	COLEOPTERA	SCARABAEIDAE	Gyronotus mulanjensis	U	NT
ANIMALIA	ARTHROPODA	INSECTA	COLEOPTERA	SCARABAEIDAE	Heptaulacus gadetinus	U	EN
ANIMALIA	ARTHROPODA	INSECTA	COLEOPTERA	SCARABAEIDAE	Holocephalus sculptus	U	NT
ANIMALIA	ARTHROPODA	INSECTA	COLEOPTERA	SCARABAEIDAE	Macroderes endroedyi	I	NT
ANIMALIA	ARTHROPODA	INSECTA	COLEOPTERA	SCARABAEIDAE	Macroderes undulatus	U	NT
ANIMALIA	ARTHROPODA	INSECTA	COLEOPTERA	SCARABAEIDAE	Mimonthophagus limbibasis	I	NT
ANIMALIA	ARTHROPODA	INSECTA	COLEOPTERA	SCARABAEIDAE	Onoreidium howdeni	U	EN
ANIMALIA	ARTHROPODA	INSECTA	COLEOPTERA	SCARABAEIDAE	Ontherus grandis	U	NT
ANIMALIA	ARTHROPODA	INSECTA	COLEOPTERA	SCARABAEIDAE	Ontherus hadros	U	VU
ANIMALIA	ARTHROPODA	INSECTA	COLEOPTERA	SCARABAEIDAE	Onthophagus undulans	U	VU
ANIMALIA	ARTHROPODA	INSECTA	COLEOPTERA	SCARABAEIDAE	Onthophagus villanuevai	U	NT
ANIMALIA	ARTHROPODA	INSECTA	COLEOPTERA	SCARABAEIDAE	Oxysternon pteroderum	U	NT
ANIMALIA	ARTHROPODA	INSECTA	COLEOPTERA	SCARABAEIDAE	Pachysoma endroedyi	I	VU
ANIMALIA	ARTHROPODA	INSECTA	COLEOPTERA	SCARABAEIDAE	Pachysoma glentoni	U	VU
ANIMALIA	ARTHROPODA	INSECTA	COLEOPTERA	SCARABAEIDAE	Pedaridium hirsutum	U	VU
ANIMALIA	ARTHROPODA	INSECTA	COLEOPTERA	SCARABAEIDAE	Phanaeus achilles	U	NT
ANIMALIA	ARTHROPODA	INSECTA	COLEOPTERA	SCARABAEIDAE	Platyonitis bicuariensis	I	VU
ANIMALIA	ARTHROPODA	INSECTA	COLEOPTERA	SCARABAEIDAE	Proagoderus uluguru	I	EN
ANIMALIA	ARTHROPODA	INSECTA	COLEOPTERA	SCARABAEIDAE	Sarophorus punctatus	I	EN
ANIMALIA	ARTHROPODA	INSECTA	COLEOPTERA	SCARABAEIDAE	Scarabaeus bornemizzai	I	NT
ANIMALIA	ARTHROPODA	INSECTA	COLEOPTERA	SCARABAEIDAE	Scybalocanthon arcabuquensis	I	EN
ANIMALIA	ARTHROPODA	INSECTA	COLEOPTERA	TENEBRIONIDAE	Allecula suberina	I	EN
ANIMALIA	ARTHROPODA	INSECTA	COLEOPTERA	TENEBRIONIDAE	Corticeus bicoloroides	U	EN
ANIMALIA	ARTHROPODA	INSECTA	COLEOPTERA	TENEBRIONIDAE	Gerandryus aetnensis	U	NT
ANIMALIA	ARTHROPODA	INSECTA	COLEOPTERA	TENEBRIONIDAE	Gonodera metallica	U	NT
ANIMALIA	ARTHROPODA	INSECTA	COLEOPTERA	TENEBRIONIDAE	Hymenorus baudii	U	NT
ANIMALIA	ARTHROPODA	INSECTA	COLEOPTERA	TENEBRIONIDAE	Microblattellus lecongmani	U	VU
ANIMALIA	ARTHROPODA	INSECTA	COLEOPTERA	TENEBRIONIDAE	Mycetochara flavipennis	U	EN
ANIMALIA	ARTHROPODA	INSECTA	COLEOPTERA	TENEBRIONIDAE	Mycetochara melandryina	U	CR
ANIMALIA	ARTHROPODA	INSECTA	COLEOPTERA	TENEBRIONIDAE	Mycetochara roubali	I	VU
ANIMALIA	ARTHROPODA	INSECTA	COLEOPTERA	TENEBRIONIDAE	Mycetochara straussii	U	NT
ANIMALIA	ARTHROPODA	INSECTA	COLEOPTERA	TENEBRIONIDAE	Mycetochara thoracica	U	NT
ANIMALIA	ARTHROPODA	INSECTA	COLEOPTERA	TENEBRIONIDAE	Pelleas crotchii	U	NT
ANIMALIA	ARTHROPODA	INSECTA	COLEOPTERA	TETRATOMIDAE	Tetratoma tedaldi	U	VU
ANIMALIA	ARTHROPODA	INSECTA	COLEOPTERA	TROGOSITIDAE	Leipaspis lauricola	U	VU
ANIMALIA	ARTHROPODA	INSECTA	COLEOPTERA	TROGOSITIDAE	Leipaspis pinicola	U	EN
ANIMALIA	ARTHROPODA	INSECTA	COLEOPTERA	TROGOSITIDAE	Seidlitzella procera	U	NT
ANIMALIA	ARTHROPODA	INSECTA	COLEOPTERA	ZOPHERIDAE	Diodesma besucheti	U	EN
ANIMALIA	ARTHROPODA	INSECTA	COLEOPTERA	ZOPHERIDAE	Pycnomerus italicus	U	EN
ANIMALIA	ARTHROPODA	INSECTA	COLEOPTERA	ZOPHERIDAE	Tarphius gibbulus	U	NT
ANIMALIA	ARTHROPODA	INSECTA	COLEOPTERA	ZOPHERIDAE	Tarphius oulmesensis	U	VU
ANIMALIA	ARTHROPODA	INSECTA	DIPTERA	ANTHOMYIIDAE	Botanophila fonsecai	U	EN
ANIMALIA	ARTHROPODA	INSECTA	DIPTERA	BLEPHARICERIDAE	Edwardsina tasmaniensis	U	VU
ANIMALIA	ARTHROPODA	INSECTA	GRYLLOBLATTODEA	GRYLLOBLATTIDAE	Galloisiana kosuensis	U	CR
ANIMALIA	ARTHROPODA	INSECTA	GRYLLOBLATTODEA	GRYLLOBLATTIDAE	Galloisiana odaesanensis	U	NT
ANIMALIA	ARTHROPODA	INSECTA	GRYLLOBLATTODEA	GRYLLOBLATTIDAE	Namkungia biryongensis	U	EN
ANIMALIA	ARTHROPODA	INSECTA	GRYLLOBLATTODEA	GRYLLOBLATTIDAE	Namkungia magnus	U	VU
ANIMALIA	ARTHROPODA	INSECTA	HEMIPTERA	PENTATOMIDAE	Macrorhaphis wollastoni	U	EN
ANIMALIA	ARTHROPODA	INSECTA	HEMIPTERA	PSEUDOCOCCIDAE	Pseudococcus markharveyi	U	CR
ANIMALIA	ARTHROPODA	INSECTA	HEMIPTERA	PSYLLIDAE	Acizzia mccarthyi	U	EN
ANIMALIA	ARTHROPODA	INSECTA	HEMIPTERA	PSYLLIDAE	Acizzia veski	U	CR
ANIMALIA	ARTHROPODA	INSECTA	HEMIPTERA	TRIOZIDAE	Trioza barrettae	U	CR
ANIMALIA	ARTHROPODA	INSECTA	HYMENOPTERA	ANDRENIDAE	Andrena labiatula	U	CR
ANIMALIA	ARTHROPODA	INSECTA	HYMENOPTERA	ANDRENIDAE	Andrena stepposa	U	EN
ANIMALIA	ARTHROPODA	INSECTA	HYMENOPTERA	ANDRENIDAE	Flavipanurgus granadensis	U	EN
ANIMALIA	ARTHROPODA	INSECTA	HYMENOPTERA	APIDAE	Ammobates dusmeti	U	CR
ANIMALIA	ARTHROPODA	INSECTA	HYMENOPTERA	APIDAE	Ammobates melectoides	U	EN
ANIMALIA	ARTHROPODA	INSECTA	HYMENOPTERA	APIDAE	Bombus affinis	U	CR
ANIMALIA	ARTHROPODA	INSECTA	HYMENOPTERA	APIDAE	Bombus alpinus	U	VU
ANIMALIA	ARTHROPODA	INSECTA	HYMENOPTERA	APIDAE	Bombus brachycephalus	U	EN
ANIMALIA	ARTHROPODA	INSECTA	HYMENOPTERA	APIDAE	Bombus caliginosus	U	VU
ANIMALIA	ARTHROPODA	INSECTA	HYMENOPTERA	APIDAE	Bombus crotchii	U	EN
ANIMALIA	ARTHROPODA	INSECTA	HYMENOPTERA	APIDAE	Bombus dahlbomii	U	EN
ANIMALIA	ARTHROPODA	INSECTA	HYMENOPTERA	APIDAE	Bombus fervidus	U	VU
ANIMALIA	ARTHROPODA	INSECTA	HYMENOPTERA	APIDAE	Bombus franklini	U	CR
ANIMALIA	ARTHROPODA	INSECTA	HYMENOPTERA	APIDAE	Bombus fraternus	I	EN
ANIMALIA	ARTHROPODA	INSECTA	HYMENOPTERA	APIDAE	Bombus haueri	I	EN
ANIMALIA	ARTHROPODA	INSECTA	HYMENOPTERA	APIDAE	Bombus inexspectatus	U	EN
ANIMALIA	ARTHROPODA	INSECTA	HYMENOPTERA	APIDAE	Bombus mendax	U	NT
ANIMALIA	ARTHROPODA	INSECTA	HYMENOPTERA	APIDAE	Bombus mexicanus	U	VU
ANIMALIA	ARTHROPODA	INSECTA	HYMENOPTERA	APIDAE	Bombus morrisoni	U	VU
ANIMALIA	ARTHROPODA	INSECTA	HYMENOPTERA	APIDAE	Bombus mucidus	U	NT
ANIMALIA	ARTHROPODA	INSECTA	HYMENOPTERA	APIDAE	Bombus occidentalis	U	VU
ANIMALIA	ARTHROPODA	INSECTA	HYMENOPTERA	APIDAE	Bombus pensylvanicus	U	VU
ANIMALIA	ARTHROPODA	INSECTA	HYMENOPTERA	APIDAE	Bombus reinigiellus	U	EN
ANIMALIA	ARTHROPODA	INSECTA	HYMENOPTERA	APIDAE	Bombus rubriventris	U	CR
ANIMALIA	ARTHROPODA	INSECTA	HYMENOPTERA	APIDAE	Bombus steindachneri	U	EN
ANIMALIA	ARTHROPODA	INSECTA	HYMENOPTERA	APIDAE	Bombus suckleyi	U	CR
ANIMALIA	ARTHROPODA	INSECTA	HYMENOPTERA	APIDAE	Bombus terricola	U	VU
ANIMALIA	ARTHROPODA	INSECTA	HYMENOPTERA	APIDAE	Bombus variabilis	U	CR
ANIMALIA	ARTHROPODA	INSECTA	HYMENOPTERA	APIDAE	Epeolus cruciger	U	NT
ANIMALIA	ARTHROPODA	INSECTA	HYMENOPTERA	APIDAE	Eucera gracilipes	U	NT
ANIMALIA	ARTHROPODA	INSECTA	HYMENOPTERA	APIDAE	Nomada argentata	U	NT
ANIMALIA	ARTHROPODA	INSECTA	HYMENOPTERA	APIDAE	Nomada armata	U	NT
ANIMALIA	ARTHROPODA	INSECTA	HYMENOPTERA	APIDAE	Nomada baccata	U	NT
ANIMALIA	ARTHROPODA	INSECTA	HYMENOPTERA	APIDAE	Nomada cretensis	U	NT
ANIMALIA	ARTHROPODA	INSECTA	HYMENOPTERA	APIDAE	Nomada errans	U	NT
ANIMALIA	ARTHROPODA	INSECTA	HYMENOPTERA	APIDAE	Nomada noskiewiczi	U	VU
ANIMALIA	ARTHROPODA	INSECTA	HYMENOPTERA	APIDAE	Nomada siciliensis	U	CR
ANIMALIA	ARTHROPODA	INSECTA	HYMENOPTERA	COLLETIDAE	Hylaeus crassanus	U	NT
ANIMALIA	ARTHROPODA	INSECTA	HYMENOPTERA	COLLETIDAE	Hylaeus friesei	U	NT
ANIMALIA	ARTHROPODA	INSECTA	HYMENOPTERA	FORMICIDAE	Formica aquilonia	U	LR/nt
ANIMALIA	ARTHROPODA	INSECTA	HYMENOPTERA	FORMICIDAE	Formica lugubris	U	LR/nt
ANIMALIA	ARTHROPODA	INSECTA	HYMENOPTERA	FORMICIDAE	Formica polyctena	U	LR/nt
ANIMALIA	ARTHROPODA	INSECTA	HYMENOPTERA	FORMICIDAE	Formica pratensis	U	LR/nt
ANIMALIA	ARTHROPODA	INSECTA	HYMENOPTERA	FORMICIDAE	Formica rufa	U	LR/nt
ANIMALIA	ARTHROPODA	INSECTA	HYMENOPTERA	FORMICIDAE	Formica uralensis	U	LR/nt
ANIMALIA	ARTHROPODA	INSECTA	HYMENOPTERA	HALICTIDAE	Halictus carinthiacus	U	EN
ANIMALIA	ARTHROPODA	INSECTA	HYMENOPTERA	HALICTIDAE	Lasioglossum breviventre	U	EN
ANIMALIA	ARTHROPODA	INSECTA	HYMENOPTERA	HALICTIDAE	Lasioglossum minutulum	U	NT
ANIMALIA	ARTHROPODA	INSECTA	HYMENOPTERA	HALICTIDAE	Lasioglossum sabulosum	U	NT
ANIMALIA	ARTHROPODA	INSECTA	HYMENOPTERA	HALICTIDAE	Lasioglossum setulosum	U	NT
ANIMALIA	ARTHROPODA	INSECTA	HYMENOPTERA	MEGACHILIDAE	Megachile cypricola	U	CR
ANIMALIA	ARTHROPODA	INSECTA	HYMENOPTERA	MELITTIDAE	Dasypoda frieseana	U	EN
ANIMALIA	ARTHROPODA	INSECTA	LEPIDOPTERA	HESPERIIDAE	Oarisma powesheik	U	CR
ANIMALIA	ARTHROPODA	INSECTA	LEPIDOPTERA	HESPERIIDAE	Ocybadistes knightorum	U	EN
ANIMALIA	ARTHROPODA	INSECTA	LEPIDOPTERA	HESPERIIDAE	Pyrgus cirsii	I	VU
ANIMALIA	ARTHROPODA	INSECTA	LEPIDOPTERA	LYCAENIDAE	Baliochila lequeuxi	I	NT
ANIMALIA	ARTHROPODA	INSECTA	LEPIDOPTERA	LYCAENIDAE	Lycaena ottomana	U	VU
ANIMALIA	ARTHROPODA	INSECTA	LEPIDOPTERA	LYCAENIDAE	Plebejus trappi	I	NT
ANIMALIA	ARTHROPODA	INSECTA	LEPIDOPTERA	LYCAENIDAE	Plebejus vogelii	U	EN
ANIMALIA	ARTHROPODA	INSECTA	LEPIDOPTERA	LYCAENIDAE	Polyommatus bollandi	U	CR
ANIMALIA	ARTHROPODA	INSECTA	LEPIDOPTERA	LYCAENIDAE	Polyommatus galloi	I	VU
ANIMALIA	ARTHROPODA	INSECTA	LEPIDOPTERA	LYCAENIDAE	Polyommatus golgus	I	VU
ANIMALIA	ARTHROPODA	INSECTA	LEPIDOPTERA	LYCAENIDAE	Polyommatus guezelmavi	I	NT
ANIMALIA	ARTHROPODA	INSECTA	LEPIDOPTERA	LYCAENIDAE	Polyommatus humedasae	I	EN
ANIMALIA	ARTHROPODA	INSECTA	LEPIDOPTERA	LYCAENIDAE	Polyommatus nephohiptamenos	I	NT
ANIMALIA	ARTHROPODA	INSECTA	LEPIDOPTERA	LYCAENIDAE	Polyommatus nivescens	I	NT
ANIMALIA	ARTHROPODA	INSECTA	LEPIDOPTERA	LYCAENIDAE	Polyommatus orphicus	I	VU
ANIMALIA	ARTHROPODA	INSECTA	LEPIDOPTERA	LYCAENIDAE	Polyommatus theresiae	U	EN
ANIMALIA	ARTHROPODA	INSECTA	LEPIDOPTERA	LYCAENIDAE	Pseudophilotes panoptes	I	NT
ANIMALIA	ARTHROPODA	INSECTA	LEPIDOPTERA	LYCAENIDAE	Pseudophilotes sinaicus	U	CR
ANIMALIA	ARTHROPODA	INSECTA	LEPIDOPTERA	LYCAENIDAE	Satyrium jebelia	U	VU
ANIMALIA	ARTHROPODA	INSECTA	LEPIDOPTERA	LYCAENIDAE	Turanana taygetica	I	NT
ANIMALIA	ARTHROPODA	INSECTA	LEPIDOPTERA	NYMPHALIDAE	Coenonympha orientalis	I	VU
ANIMALIA	ARTHROPODA	INSECTA	LEPIDOPTERA	NYMPHALIDAE	Erebia christi	I	VU
ANIMALIA	ARTHROPODA	INSECTA	LEPIDOPTERA	NYMPHALIDAE	Erebia claudina	I	NT
ANIMALIA	ARTHROPODA	INSECTA	LEPIDOPTERA	NYMPHALIDAE	Erebia epistygne	I	NT
ANIMALIA	ARTHROPODA	INSECTA	LEPIDOPTERA	NYMPHALIDAE	Erebia flavofasciata	I	NT
ANIMALIA	ARTHROPODA	INSECTA	LEPIDOPTERA	NYMPHALIDAE	Erebia sudetica	I	VU
ANIMALIA	ARTHROPODA	INSECTA	LEPIDOPTERA	NYMPHALIDAE	Hipparchia bacchus	I	VU
ANIMALIA	ARTHROPODA	INSECTA	LEPIDOPTERA	NYMPHALIDAE	Hipparchia christenseni	I	EN
ANIMALIA	ARTHROPODA	INSECTA	LEPIDOPTERA	NYMPHALIDAE	Hipparchia fagi	I	NT
ANIMALIA	ARTHROPODA	INSECTA	LEPIDOPTERA	NYMPHALIDAE	Hipparchia leighebi	I	NT
ANIMALIA	ARTHROPODA	INSECTA	LEPIDOPTERA	NYMPHALIDAE	Hipparchia sbordonii	I	EN
ANIMALIA	ARTHROPODA	INSECTA	LEPIDOPTERA	NYMPHALIDAE	Hipparchia tilosi	I	VU
ANIMALIA	ARTHROPODA	INSECTA	LEPIDOPTERA	NYMPHALIDAE	Maniola chia	I	NT
ANIMALIA	ARTHROPODA	INSECTA	LEPIDOPTERA	NYMPHALIDAE	Neptis larseni	U	NT
ANIMALIA	ARTHROPODA	INSECTA	LEPIDOPTERA	NYMPHALIDAE	Pararge xiphia	I	EN
ANIMALIA	ARTHROPODA	INSECTA	LEPIDOPTERA	NYMPHALIDAE	Pseudochazara amymone	I	EN
ANIMALIA	ARTHROPODA	INSECTA	LEPIDOPTERA	NYMPHALIDAE	Pseudochazara cingovskii	I	CR
ANIMALIA	ARTHROPODA	INSECTA	LEPIDOPTERA	NYMPHALIDAE	Pseudochazara euxina	I	EN
ANIMALIA	ARTHROPODA	INSECTA	LEPIDOPTERA	NYMPHALIDAE	Pseudochazara orestes	I	VU
ANIMALIA	ARTHROPODA	INSECTA	LEPIDOPTERA	PAPILIONIDAE	Atrophaneura horishanus	I	NT
ANIMALIA	ARTHROPODA	INSECTA	LEPIDOPTERA	PAPILIONIDAE	Atrophaneura luchti	I	EN
ANIMALIA	ARTHROPODA	INSECTA	LEPIDOPTERA	PAPILIONIDAE	Baronia brevicornis	I	EN
ANIMALIA	ARTHROPODA	INSECTA	LEPIDOPTERA	PAPILIONIDAE	Bhutanitis ludlowi	I	EN
ANIMALIA	ARTHROPODA	INSECTA	LEPIDOPTERA	PAPILIONIDAE	Bhutanitis thaidina	L	NT
ANIMALIA	ARTHROPODA	INSECTA	LEPIDOPTERA	PAPILIONIDAE	Byasa laos	I	NT
ANIMALIA	ARTHROPODA	INSECTA	LEPIDOPTERA	PAPILIONIDAE	Chilasa moerneri	I	NT
ANIMALIA	ARTHROPODA	INSECTA	LEPIDOPTERA	PAPILIONIDAE	Euryades corethrus	I	NT
ANIMALIA	ARTHROPODA	INSECTA	LEPIDOPTERA	PAPILIONIDAE	Euryades duponchelii	I	NT
ANIMALIA	ARTHROPODA	INSECTA	LEPIDOPTERA	PAPILIONIDAE	Eurytides iphitas	U	EN
ANIMALIA	ARTHROPODA	INSECTA	LEPIDOPTERA	PAPILIONIDAE	Heraclides himeros	I	VU
ANIMALIA	ARTHROPODA	INSECTA	LEPIDOPTERA	PAPILIONIDAE	Losaria rhodifer	I	NT
ANIMALIA	ARTHROPODA	INSECTA	LEPIDOPTERA	PAPILIONIDAE	Ornithoptera aesacus	L	VU
ANIMALIA	ARTHROPODA	INSECTA	LEPIDOPTERA	PAPILIONIDAE	Ornithoptera alexandrae	L	EN
ANIMALIA	ARTHROPODA	INSECTA	LEPIDOPTERA	PAPILIONIDAE	Ornithoptera croesus	L	NT
ANIMALIA	ARTHROPODA	INSECTA	LEPIDOPTERA	PAPILIONIDAE	Ornithoptera meridionalis	L	NT
ANIMALIA	ARTHROPODA	INSECTA	LEPIDOPTERA	PAPILIONIDAE	Ornithoptera paradisea	L	NT
ANIMALIA	ARTHROPODA	INSECTA	LEPIDOPTERA	PAPILIONIDAE	Ornithoptera richmondia	U	NT
ANIMALIA	ARTHROPODA	INSECTA	LEPIDOPTERA	PAPILIONIDAE	Ornithoptera rothschildi	L	NT
ANIMALIA	ARTHROPODA	INSECTA	LEPIDOPTERA	PAPILIONIDAE	Pachliopta atropos	I	NT
ANIMALIA	ARTHROPODA	INSECTA	LEPIDOPTERA	PAPILIONIDAE	Pachliopta jophon	L	EN
ANIMALIA	ARTHROPODA	INSECTA	LEPIDOPTERA	PAPILIONIDAE	Papilio esperanza	I	EN
ANIMALIA	ARTHROPODA	INSECTA	LEPIDOPTERA	PAPILIONIDAE	Papilio godeffroyi	I	EN
ANIMALIA	ARTHROPODA	INSECTA	LEPIDOPTERA	PAPILIONIDAE	Papilio osmana	U	VU
ANIMALIA	ARTHROPODA	INSECTA	LEPIDOPTERA	PAPILIONIDAE	Papilio schmeltzi	I	NT
ANIMALIA	ARTHROPODA	INSECTA	LEPIDOPTERA	PAPILIONIDAE	Parides ascanius	I	VU
ANIMALIA	ARTHROPODA	INSECTA	LEPIDOPTERA	PAPILIONIDAE	Parides burchellanus	I	EN
ANIMALIA	ARTHROPODA	INSECTA	LEPIDOPTERA	PAPILIONIDAE	Parides gundlachianus	I	NT
ANIMALIA	ARTHROPODA	INSECTA	LEPIDOPTERA	PAPILIONIDAE	Trogonoptera trojana	L	NT
ANIMALIA	ARTHROPODA	INSECTA	LEPIDOPTERA	PAPILIONIDAE	Troides andromache	L	VU
ANIMALIA	ARTHROPODA	INSECTA	LEPIDOPTERA	PAPILIONIDAE	Troides dohertyi	L	VU
ANIMALIA	ARTHROPODA	INSECTA	LEPIDOPTERA	PAPILIONIDAE	Troides prattorum	I	VU
ANIMALIA	ARTHROPODA	INSECTA	LEPIDOPTERA	PAPILIONIDAE	Troides riedeli	I	NT
ANIMALIA	ARTHROPODA	INSECTA	LEPIDOPTERA	PIERIDAE	Colias phicomone	I	NT
ANIMALIA	ARTHROPODA	INSECTA	LEPIDOPTERA	PIERIDAE	Gonepteryx cleobule	I	VU
ANIMALIA	ARTHROPODA	INSECTA	LEPIDOPTERA	PIERIDAE	Gonepteryx maderensis	I	EN
ANIMALIA	ARTHROPODA	INSECTA	LEPIDOPTERA	PIERIDAE	Mylothris atewa	U	VU
ANIMALIA	ARTHROPODA	INSECTA	LEPIDOPTERA	PIERIDAE	Pieris cheiranthi	I	EN
ANIMALIA	ARTHROPODA	INSECTA	LEPIDOPTERA	PIERIDAE	Pieris wollastoni	I	CR
ANIMALIA	ARTHROPODA	INSECTA	LEPIDOPTERA	SPHINGIDAE	Tinostoma smaragditis	U	EN
ANIMALIA	ARTHROPODA	INSECTA	MANTODEA	MANTIDAE	Ameles fasciipennis	U	CR
ANIMALIA	ARTHROPODA	INSECTA	ODONATA	AESHNIDAE	Austroaeschna christine	U	VU
ANIMALIA	ARTHROPODA	INSECTA	ODONATA	AESHNIDAE	Austroaeschna eungella	U	VU
ANIMALIA	ARTHROPODA	INSECTA	ODONATA	AESHNIDAE	Austrophlebia subcostalis	U	NT
ANIMALIA	ARTHROPODA	INSECTA	ODONATA	AESHNIDAE	Boyeria cretensis	U	EN
ANIMALIA	ARTHROPODA	INSECTA	ODONATA	AESHNIDAE	Gynacantha bispina	U	VU
ANIMALIA	ARTHROPODA	INSECTA	ODONATA	AESHNIDAE	Gynacantha comorensis	U	VU
ANIMALIA	ARTHROPODA	INSECTA	ODONATA	AESHNIDAE	Gynacantha constricta	U	VU
ANIMALIA	ARTHROPODA	INSECTA	ODONATA	AESHNIDAE	Gynacantha musa	U	NT
ANIMALIA	ARTHROPODA	INSECTA	ODONATA	AESHNIDAE	Gynacantha penelope	U	NT
ANIMALIA	ARTHROPODA	INSECTA	ODONATA	AESHNIDAE	Indaeschna baluga	U	VU
ANIMALIA	ARTHROPODA	INSECTA	ODONATA	AESHNIDAE	Linaeschna polli	U	VU
ANIMALIA	ARTHROPODA	INSECTA	ODONATA	AESHNIDAE	Pinheyschna waterstoni	U	VU
ANIMALIA	ARTHROPODA	INSECTA	ODONATA	AESHNIDAE	Pinheyschna yemenensis	U	VU
ANIMALIA	ARTHROPODA	INSECTA	ODONATA	AESHNIDAE	Planaeschna celia	U	VU
ANIMALIA	ARTHROPODA	INSECTA	ODONATA	AESHNIDAE	Planaeschna intersedens	U	NT
ANIMALIA	ARTHROPODA	INSECTA	ODONATA	AESHNIDAE	Rhionaeschna caligo	U	EN
ANIMALIA	ARTHROPODA	INSECTA	ODONATA	AESHNIDAE	Sarasaeschna niisatoi	U	VU
ANIMALIA	ARTHROPODA	INSECTA	ODONATA	AESHNIDAE	Staurophlebia bosqi	I	EN
ANIMALIA	ARTHROPODA	INSECTA	ODONATA	ARGIOLESTIDAE	Archiargiolestes pusillissimus	U	NT
ANIMALIA	ARTHROPODA	INSECTA	ODONATA	ARGIOLESTIDAE	Austroargiolestes elke	U	VU
ANIMALIA	ARTHROPODA	INSECTA	ODONATA	ARGIOLESTIDAE	Caledopteryx maculata	U	NT
ANIMALIA	ARTHROPODA	INSECTA	ODONATA	ARGIOLESTIDAE	Caledopteryx sarasini	U	NT
ANIMALIA	ARTHROPODA	INSECTA	ODONATA	ARGIOLESTIDAE	Luzonargiolestes realensis	U	VU
ANIMALIA	ARTHROPODA	INSECTA	ODONATA	ARGIOLESTIDAE	Nesolestes pauliani	U	EN
ANIMALIA	ARTHROPODA	INSECTA	ODONATA	ARGIOLESTIDAE	Neurolestes nigeriensis	U	CR
ANIMALIA	ARTHROPODA	INSECTA	ODONATA	ARGIOLESTIDAE	Podolestes atomarius	U	NT
ANIMALIA	ARTHROPODA	INSECTA	ODONATA	ARGIOLESTIDAE	Podolestes buwaldai	U	NT
ANIMALIA	ARTHROPODA	INSECTA	ODONATA	ARGIOLESTIDAE	Podolestes coomansi	U	VU
ANIMALIA	ARTHROPODA	INSECTA	ODONATA	ARGIOLESTIDAE	Podolestes harrissoni	U	NT
ANIMALIA	ARTHROPODA	INSECTA	ODONATA	CALOPTERYGIDAE	Archineura maxima	I	CR
ANIMALIA	ARTHROPODA	INSECTA	ODONATA	CALOPTERYGIDAE	Atrocalopteryx atrocyana	U	NT
ANIMALIA	ARTHROPODA	INSECTA	ODONATA	CALOPTERYGIDAE	Atrocalopteryx coomani	U	NT
ANIMALIA	ARTHROPODA	INSECTA	ODONATA	CALOPTERYGIDAE	Caliphaea angka	U	EN
ANIMALIA	ARTHROPODA	INSECTA	ODONATA	CALOPTERYGIDAE	Calopteryx hyalina	U	EN
ANIMALIA	ARTHROPODA	INSECTA	ODONATA	CALOPTERYGIDAE	Calopteryx syriaca	U	EN
ANIMALIA	ARTHROPODA	INSECTA	ODONATA	CALOPTERYGIDAE	Hetaerina rudis	U	VU
ANIMALIA	ARTHROPODA	INSECTA	ODONATA	CALOPTERYGIDAE	Sapho infumosa	U	NT
ANIMALIA	ARTHROPODA	INSECTA	ODONATA	CALOPTERYGIDAE	Sapho puella	U	EN
ANIMALIA	ARTHROPODA	INSECTA	ODONATA	CALOPTERYGIDAE	Umma declivium	U	VU
ANIMALIA	ARTHROPODA	INSECTA	ODONATA	CALOPTERYGIDAE	Umma femina	I	VU
ANIMALIA	ARTHROPODA	INSECTA	ODONATA	CALOPTERYGIDAE	Umma mesumbei	U	EN
ANIMALIA	ARTHROPODA	INSECTA	ODONATA	CALOPTERYGIDAE	Umma purpurea	U	EN
ANIMALIA	ARTHROPODA	INSECTA	ODONATA	CHLOROCYPHIDAE	Africocypha centripunctata	U	EN
ANIMALIA	ARTHROPODA	INSECTA	ODONATA	CHLOROCYPHIDAE	Africocypha varicolor	U	EN
ANIMALIA	ARTHROPODA	INSECTA	ODONATA	CHLOROCYPHIDAE	Chlorocypha aurora	U	CR
ANIMALIA	ARTHROPODA	INSECTA	ODONATA	CHLOROCYPHIDAE	Chlorocypha flammea	U	VU
ANIMALIA	ARTHROPODA	INSECTA	ODONATA	CHLOROCYPHIDAE	Chlorocypha helenae	U	NT
ANIMALIA	ARTHROPODA	INSECTA	ODONATA	CHLOROCYPHIDAE	Chlorocypha jejuna	U	CR
ANIMALIA	ARTHROPODA	INSECTA	ODONATA	CHLOROCYPHIDAE	Chlorocypha neptunus	U	VU
ANIMALIA	ARTHROPODA	INSECTA	ODONATA	CHLOROCYPHIDAE	Chlorocypha schmidti	U	EN
ANIMALIA	ARTHROPODA	INSECTA	ODONATA	CHLOROCYPHIDAE	Indocypha vittata	U	NT
ANIMALIA	ARTHROPODA	INSECTA	ODONATA	CHLOROCYPHIDAE	Libellago andamanensis	U	VU
ANIMALIA	ARTHROPODA	INSECTA	ODONATA	CHLOROCYPHIDAE	Libellago balus	U	EN
ANIMALIA	ARTHROPODA	INSECTA	ODONATA	CHLOROCYPHIDAE	Libellago orri	U	VU
ANIMALIA	ARTHROPODA	INSECTA	ODONATA	CHLOROCYPHIDAE	Pachycypha aurea	U	EN
ANIMALIA	ARTHROPODA	INSECTA	ODONATA	CHLOROCYPHIDAE	Platycypha amboniensis	U	CR
ANIMALIA	ARTHROPODA	INSECTA	ODONATA	CHLOROCYPHIDAE	Platycypha auripes	U	EN
ANIMALIA	ARTHROPODA	INSECTA	ODONATA	CHLOROCYPHIDAE	Platycypha pinheyi	I	NT
ANIMALIA	ARTHROPODA	INSECTA	ODONATA	CHLOROCYPHIDAE	Rhinocypha hageni	U	EN
ANIMALIA	ARTHROPODA	INSECTA	ODONATA	CHLOROCYPHIDAE	Rhinocypha latimacula	U	EN
ANIMALIA	ARTHROPODA	INSECTA	ODONATA	CHLOROCYPHIDAE	Rhinocypha orea	U	EN
ANIMALIA	ARTHROPODA	INSECTA	ODONATA	CHLOROCYPHIDAE	Rhinocypha sanguinolenta	U	NT
ANIMALIA	ARTHROPODA	INSECTA	ODONATA	CHLOROCYPHIDAE	Rhinocypha stygia	U	NT
ANIMALIA	ARTHROPODA	INSECTA	ODONATA	CHLOROCYPHIDAE	Rhinocypha xanthe	U	NT
ANIMALIA	ARTHROPODA	INSECTA	ODONATA	CHLOROCYPHIDAE	Rhinoneura villosipes	I	VU
ANIMALIA	ARTHROPODA	INSECTA	ODONATA	CHLOROCYPHIDAE	Stenocypha jacksoni	U	NT
ANIMALIA	ARTHROPODA	INSECTA	ODONATA	CHLOROCYPHIDAE	Stenocypha molindica	I	NT
ANIMALIA	ARTHROPODA	INSECTA	ODONATA	CHLOROCYPHIDAE	Sundacypha striata	U	VU
ANIMALIA	ARTHROPODA	INSECTA	ODONATA	CHLOROGOMPHIDAE	Chlorogomphus auratus	U	NT
ANIMALIA	ARTHROPODA	INSECTA	ODONATA	CHLOROGOMPHIDAE	Chlorogomphus gracilis	U	VU
ANIMALIA	ARTHROPODA	INSECTA	ODONATA	CHLOROGOMPHIDAE	Chlorogomphus nakamurai	U	VU
ANIMALIA	ARTHROPODA	INSECTA	ODONATA	CHLOROGOMPHIDAE	Watanabeopetalia uenoi	U	VU
ANIMALIA	ARTHROPODA	INSECTA	ODONATA	COENAGRIONIDAE	Acanthagrion franciscoi	U	CR
ANIMALIA	ARTHROPODA	INSECTA	ODONATA	COENAGRIONIDAE	Acanthagrion williamsoni	U	EN
ANIMALIA	ARTHROPODA	INSECTA	ODONATA	COENAGRIONIDAE	Africallagma cuneistigma	U	CR
ANIMALIA	ARTHROPODA	INSECTA	ODONATA	COENAGRIONIDAE	Agriocnemis palaeforma	I	VU
ANIMALIA	ARTHROPODA	INSECTA	ODONATA	COENAGRIONIDAE	Amphicnemis amabilis	U	EN
ANIMALIA	ARTHROPODA	INSECTA	ODONATA	COENAGRIONIDAE	Amphicnemis annae	U	NT
ANIMALIA	ARTHROPODA	INSECTA	ODONATA	COENAGRIONIDAE	Amphicnemis bicolor	U	EN
ANIMALIA	ARTHROPODA	INSECTA	ODONATA	COENAGRIONIDAE	Amphicnemis erminea	U	NT
ANIMALIA	ARTHROPODA	INSECTA	ODONATA	COENAGRIONIDAE	Amphicnemis hoisen	U	EN
ANIMALIA	ARTHROPODA	INSECTA	ODONATA	COENAGRIONIDAE	Amphicnemis madelenae	U	CR
ANIMALIA	ARTHROPODA	INSECTA	ODONATA	COENAGRIONIDAE	Amphicnemis mariae	U	EN
ANIMALIA	ARTHROPODA	INSECTA	ODONATA	COENAGRIONIDAE	Amphicnemis pandanicola	U	VU
ANIMALIA	ARTHROPODA	INSECTA	ODONATA	COENAGRIONIDAE	Amphicnemis platystyla	U	NT
ANIMALIA	ARTHROPODA	INSECTA	ODONATA	COENAGRIONIDAE	Amphicnemis remiger	U	NT
ANIMALIA	ARTHROPODA	INSECTA	ODONATA	COENAGRIONIDAE	Amphicnemis triplex	U	NT
ANIMALIA	ARTHROPODA	INSECTA	ODONATA	COENAGRIONIDAE	Andinagrion garrisoni	U	NT
ANIMALIA	ARTHROPODA	INSECTA	ODONATA	COENAGRIONIDAE	Argia rosseri	U	NT
ANIMALIA	ARTHROPODA	INSECTA	ODONATA	COENAGRIONIDAE	Ceriagrion citrinum	U	EN
ANIMALIA	ARTHROPODA	INSECTA	ODONATA	COENAGRIONIDAE	Coenagriocnemis insularis	U	EN
ANIMALIA	ARTHROPODA	INSECTA	ODONATA	COENAGRIONIDAE	Coenagrion intermedium	U	VU
ANIMALIA	ARTHROPODA	INSECTA	ODONATA	COENAGRIONIDAE	Coryphagrion grandis	U	VU
ANIMALIA	ARTHROPODA	INSECTA	ODONATA	COENAGRIONIDAE	Drepanoneura donnellyi	U	EN
ANIMALIA	ARTHROPODA	INSECTA	ODONATA	COENAGRIONIDAE	Fluminagrion taxaense	U	CR
ANIMALIA	ARTHROPODA	INSECTA	ODONATA	COENAGRIONIDAE	Franciscagrion franciscoi	U	CR
ANIMALIA	ARTHROPODA	INSECTA	ODONATA	COENAGRIONIDAE	Franciscagrion longispinum	U	CR
ANIMALIA	ARTHROPODA	INSECTA	ODONATA	COENAGRIONIDAE	Franciscobasis franciscoi	U	CR
ANIMALIA	ARTHROPODA	INSECTA	ODONATA	COENAGRIONIDAE	Ischnura gemina	U	EN
ANIMALIA	ARTHROPODA	INSECTA	ODONATA	COENAGRIONIDAE	Ischnura jeanyvesmeyeri	U	CR
ANIMALIA	ARTHROPODA	INSECTA	ODONATA	COENAGRIONIDAE	Ischnura rurutana	U	CR
ANIMALIA	ARTHROPODA	INSECTA	ODONATA	COENAGRIONIDAE	Ischnura thelmae	U	EN
ANIMALIA	ARTHROPODA	INSECTA	ODONATA	COENAGRIONIDAE	Mecistogaster asticta	U	VU
ANIMALIA	ARTHROPODA	INSECTA	ODONATA	COENAGRIONIDAE	Megalagrion jugorum	I	CR
ANIMALIA	ARTHROPODA	INSECTA	ODONATA	COENAGRIONIDAE	Megalagrion leptodemas	U	CR
ANIMALIA	ARTHROPODA	INSECTA	ODONATA	COENAGRIONIDAE	Megalagrion molokaiense	U	CR
ANIMALIA	ARTHROPODA	INSECTA	ODONATA	COENAGRIONIDAE	Megalagrion oahuense	I	VU
ANIMALIA	ARTHROPODA	INSECTA	ODONATA	COENAGRIONIDAE	Megalagrion pacificum	U	EN
ANIMALIA	ARTHROPODA	INSECTA	ODONATA	COENAGRIONIDAE	Megalagrion williamsoni	I	CR
ANIMALIA	ARTHROPODA	INSECTA	ODONATA	COENAGRIONIDAE	Megalagrion xanthomelas	U	EN
ANIMALIA	ARTHROPODA	INSECTA	ODONATA	COENAGRIONIDAE	Melanesobasis maculosa	U	NT
ANIMALIA	ARTHROPODA	INSECTA	ODONATA	COENAGRIONIDAE	Melanesobasis mcleani	U	NT
ANIMALIA	ARTHROPODA	INSECTA	ODONATA	COENAGRIONIDAE	Mesamphiagrion demarmelsi	U	EN
ANIMALIA	ARTHROPODA	INSECTA	ODONATA	COENAGRIONIDAE	Mesamphiagrion gaudiimontanum	U	EN
ANIMALIA	ARTHROPODA	INSECTA	ODONATA	COENAGRIONIDAE	Mesamphiagrion nataliae	U	EN
ANIMALIA	ARTHROPODA	INSECTA	ODONATA	COENAGRIONIDAE	Mesamphiagrion ovigerum	U	VU
ANIMALIA	ARTHROPODA	INSECTA	ODONATA	COENAGRIONIDAE	Mesamphiagrion rosseri	U	VU
ANIMALIA	ARTHROPODA	INSECTA	ODONATA	COENAGRIONIDAE	Mesamphiagrion santainense	U	EN
ANIMALIA	ARTHROPODA	INSECTA	ODONATA	COENAGRIONIDAE	Metaleptobasis gibbosa	U	CR
ANIMALIA	ARTHROPODA	INSECTA	ODONATA	COENAGRIONIDAE	Microneura caligata	U	EN
ANIMALIA	ARTHROPODA	INSECTA	ODONATA	COENAGRIONIDAE	Minagrion franciscoi	U	CR
ANIMALIA	ARTHROPODA	INSECTA	ODONATA	COENAGRIONIDAE	Minagrion ribeiroi	U	CR
ANIMALIA	ARTHROPODA	INSECTA	ODONATA	COENAGRIONIDAE	Mortonagrion indraneil	U	NT
ANIMALIA	ARTHROPODA	INSECTA	ODONATA	COENAGRIONIDAE	Nehalennia pallidula	I	NT
ANIMALIA	ARTHROPODA	INSECTA	ODONATA	COENAGRIONIDAE	Nehalennia speciosa	U	NT
ANIMALIA	ARTHROPODA	INSECTA	ODONATA	COENAGRIONIDAE	Nesobasis caerulescens	U	EN
ANIMALIA	ARTHROPODA	INSECTA	ODONATA	COENAGRIONIDAE	Nesobasis malcolmi	U	VU
ANIMALIA	ARTHROPODA	INSECTA	ODONATA	COENAGRIONIDAE	Nesobasis monticola	U	NT
ANIMALIA	ARTHROPODA	INSECTA	ODONATA	COENAGRIONIDAE	Oreocnemis phoenix	U	EN
ANIMALIA	ARTHROPODA	INSECTA	ODONATA	COENAGRIONIDAE	Oxyagrion franciscoi	U	CR
ANIMALIA	ARTHROPODA	INSECTA	ODONATA	COENAGRIONIDAE	Pandanobasis daku	U	CR
ANIMALIA	ARTHROPODA	INSECTA	ODONATA	COENAGRIONIDAE	Pandanobasis mcgregori	U	EN
ANIMALIA	ARTHROPODA	INSECTA	ODONATA	COENAGRIONIDAE	Papuagrion corruptum	U	VU
ANIMALIA	ARTHROPODA	INSECTA	ODONATA	COENAGRIONIDAE	Papuagrion laminatum	U	VU
ANIMALIA	ARTHROPODA	INSECTA	ODONATA	COENAGRIONIDAE	Pericnemis bonita	U	EN
ANIMALIA	ARTHROPODA	INSECTA	ODONATA	COENAGRIONIDAE	Pericnemis flavicornis	U	EN
ANIMALIA	ARTHROPODA	INSECTA	ODONATA	COENAGRIONIDAE	Pericnemis incallida	U	EN
ANIMALIA	ARTHROPODA	INSECTA	ODONATA	COENAGRIONIDAE	Pericnemis kiautarum	U	VU
ANIMALIA	ARTHROPODA	INSECTA	ODONATA	COENAGRIONIDAE	Pericnemis melansoni	U	CR
ANIMALIA	ARTHROPODA	INSECTA	ODONATA	COENAGRIONIDAE	Pericnemis triangularis	U	EN
ANIMALIA	ARTHROPODA	INSECTA	ODONATA	COENAGRIONIDAE	Platystigma pronoti	U	CR
ANIMALIA	ARTHROPODA	INSECTA	ODONATA	COENAGRIONIDAE	Protallagma hoffmanni	U	NT
ANIMALIA	ARTHROPODA	INSECTA	ODONATA	COENAGRIONIDAE	Protoneura macintyrei	U	NT
ANIMALIA	ARTHROPODA	INSECTA	ODONATA	COENAGRIONIDAE	Pseudagrion arabicum	U	EN
ANIMALIA	ARTHROPODA	INSECTA	ODONATA	COENAGRIONIDAE	Pseudagrion bicoerulans	U	VU
ANIMALIA	ARTHROPODA	INSECTA	ODONATA	COENAGRIONIDAE	Pseudagrion guichardi	U	VU
ANIMALIA	ARTHROPODA	INSECTA	ODONATA	COENAGRIONIDAE	Pseudagrion inopinatum	U	NT
ANIMALIA	ARTHROPODA	INSECTA	ODONATA	COENAGRIONIDAE	Pseudagrion newtoni	U	VU
ANIMALIA	ARTHROPODA	INSECTA	ODONATA	COENAGRIONIDAE	Pseudagrion pontogenes	U	VU
ANIMALIA	ARTHROPODA	INSECTA	ODONATA	COENAGRIONIDAE	Pseudagrion vumbaense	U	EN
ANIMALIA	ARTHROPODA	INSECTA	ODONATA	COENAGRIONIDAE	Sangabasis feliculoi	U	VU
ANIMALIA	ARTHROPODA	INSECTA	ODONATA	COENAGRIONIDAE	Teinobasis alternans	U	VU
ANIMALIA	ARTHROPODA	INSECTA	ODONATA	COENAGRIONIDAE	Teinobasis aurea	U	VU
ANIMALIA	ARTHROPODA	INSECTA	ODONATA	COENAGRIONIDAE	Teinobasis nigrolutea	U	EN
ANIMALIA	ARTHROPODA	INSECTA	ODONATA	COENAGRIONIDAE	Teinobasis ponapensis	U	CR
ANIMALIA	ARTHROPODA	INSECTA	ODONATA	COENAGRIONIDAE	Teinobasis ranee	U	EN
ANIMALIA	ARTHROPODA	INSECTA	ODONATA	COENAGRIONIDAE	Teinobasis strigosa	U	NT
ANIMALIA	ARTHROPODA	INSECTA	ODONATA	COENAGRIONIDAE	Telebasis farcimentum	U	VU
ANIMALIA	ARTHROPODA	INSECTA	ODONATA	COENAGRIONIDAE	Telebasis flammeola	U	EN
ANIMALIA	ARTHROPODA	INSECTA	ODONATA	CORDULEGASTRIDAE	Cordulegaster helladica	U	EN
ANIMALIA	ARTHROPODA	INSECTA	ODONATA	CORDULEGASTRIDAE	Cordulegaster heros	U	NT
ANIMALIA	ARTHROPODA	INSECTA	ODONATA	CORDULEGASTRIDAE	Cordulegaster trinacriae	U	NT
ANIMALIA	ARTHROPODA	INSECTA	ODONATA	CORDULIIDAE	Hemicordulia apoensis	U	EN
ANIMALIA	ARTHROPODA	INSECTA	ODONATA	CORDULIIDAE	Hemicordulia mindana	U	NT
ANIMALIA	ARTHROPODA	INSECTA	ODONATA	CORDULIIDAE	Metaphya elongata	U	VU
ANIMALIA	ARTHROPODA	INSECTA	ODONATA	CORDULIIDAE	Procordulia karnyi	U	NT
ANIMALIA	ARTHROPODA	INSECTA	ODONATA	CORDULIIDAE	Procordulia lompobatang	U	EN
ANIMALIA	ARTHROPODA	INSECTA	ODONATA	CORDULIIDAE	Somatochlora ozarkensis	U	NT
ANIMALIA	ARTHROPODA	INSECTA	ODONATA	EUPHAEIDAE	Bayadera hyalina	U	VU
ANIMALIA	ARTHROPODA	INSECTA	ODONATA	EUPHAEIDAE	Cyclophaea cyanifrons	U	VU
ANIMALIA	ARTHROPODA	INSECTA	ODONATA	EUPHAEIDAE	Euphaea basalis	U	NT
ANIMALIA	ARTHROPODA	INSECTA	ODONATA	EUPHAEIDAE	Euphaea pahyapi	U	EN
ANIMALIA	ARTHROPODA	INSECTA	ODONATA	GOMPHIDAE	Anormogomphus kiritshenkoi	I	NT
ANIMALIA	ARTHROPODA	INSECTA	ODONATA	GOMPHIDAE	Armagomphus armiger	U	VU
ANIMALIA	ARTHROPODA	INSECTA	ODONATA	GOMPHIDAE	Asiagomphus amamiensis	U	NT
ANIMALIA	ARTHROPODA	INSECTA	ODONATA	GOMPHIDAE	Asiagomphus coreanus	U	EN
ANIMALIA	ARTHROPODA	INSECTA	ODONATA	GOMPHIDAE	Cyclogomphus gynostylus	U	VU
ANIMALIA	ARTHROPODA	INSECTA	ODONATA	GOMPHIDAE	Epigomphus armatus	U	EN
ANIMALIA	ARTHROPODA	INSECTA	ODONATA	GOMPHIDAE	Epigomphus camelus	U	EN
ANIMALIA	ARTHROPODA	INSECTA	ODONATA	GOMPHIDAE	Epigomphus clavatus	U	EN
ANIMALIA	ARTHROPODA	INSECTA	ODONATA	GOMPHIDAE	Epigomphus corniculatus	U	EN
ANIMALIA	ARTHROPODA	INSECTA	ODONATA	GOMPHIDAE	Epigomphus donnellyi	U	EN
ANIMALIA	ARTHROPODA	INSECTA	ODONATA	GOMPHIDAE	Epigomphus flinti	U	EN
ANIMALIA	ARTHROPODA	INSECTA	ODONATA	GOMPHIDAE	Epigomphus houghtoni	U	EN
ANIMALIA	ARTHROPODA	INSECTA	ODONATA	GOMPHIDAE	Epigomphus maya	U	EN
ANIMALIA	ARTHROPODA	INSECTA	ODONATA	GOMPHIDAE	Epigomphus paulsoni	U	EN
ANIMALIA	ARTHROPODA	INSECTA	ODONATA	GOMPHIDAE	Epigomphus subsimilis	U	EN
ANIMALIA	ARTHROPODA	INSECTA	ODONATA	GOMPHIDAE	Epigomphus sulcatistyla	U	EN
ANIMALIA	ARTHROPODA	INSECTA	ODONATA	GOMPHIDAE	Epigomphus verticicornis	U	EN
ANIMALIA	ARTHROPODA	INSECTA	ODONATA	GOMPHIDAE	Epigomphus westfalli	U	EN
ANIMALIA	ARTHROPODA	INSECTA	ODONATA	GOMPHIDAE	Gomphidia pearsoni	U	EN
ANIMALIA	ARTHROPODA	INSECTA	ODONATA	GOMPHIDAE	Heliogomphus ceylonicus	U	CR
ANIMALIA	ARTHROPODA	INSECTA	ODONATA	GOMPHIDAE	Heliogomphus lyratus	U	CR
ANIMALIA	ARTHROPODA	INSECTA	ODONATA	GOMPHIDAE	Heliogomphus nietneri	U	CR
ANIMALIA	ARTHROPODA	INSECTA	ODONATA	GOMPHIDAE	Hemigomphus theischingeri	U	NT
ANIMALIA	ARTHROPODA	INSECTA	ODONATA	GOMPHIDAE	Lamelligomphus tutulus	U	VU
ANIMALIA	ARTHROPODA	INSECTA	ODONATA	GOMPHIDAE	Merogomphus femoralis	U	EN
ANIMALIA	ARTHROPODA	INSECTA	ODONATA	GOMPHIDAE	Merogomphus martini	U	NT
ANIMALIA	ARTHROPODA	INSECTA	ODONATA	GOMPHIDAE	Microgomphus wijaya	U	EN
ANIMALIA	ARTHROPODA	INSECTA	ODONATA	GOMPHIDAE	Nepogomphoides stuhlmanni	U	VU
ANIMALIA	ARTHROPODA	INSECTA	ODONATA	GOMPHIDAE	Neurogomphus pallidus	I	NT
ANIMALIA	ARTHROPODA	INSECTA	ODONATA	GOMPHIDAE	Notogomphus cottarellii	I	EN
ANIMALIA	ARTHROPODA	INSECTA	ODONATA	GOMPHIDAE	Notogomphus maathaiae	U	EN
ANIMALIA	ARTHROPODA	INSECTA	ODONATA	GOMPHIDAE	Notogomphus ruppeli	U	EN
ANIMALIA	ARTHROPODA	INSECTA	ODONATA	GOMPHIDAE	Onychogomphus boudoti	I	CR
ANIMALIA	ARTHROPODA	INSECTA	ODONATA	GOMPHIDAE	Onychogomphus costae	U	NT
ANIMALIA	ARTHROPODA	INSECTA	ODONATA	GOMPHIDAE	Onychogomphus treadawayi	U	NT
ANIMALIA	ARTHROPODA	INSECTA	ODONATA	GOMPHIDAE	Ophiogomphus acuminatus	U	NT
ANIMALIA	ARTHROPODA	INSECTA	ODONATA	GOMPHIDAE	Ophiogomphus australis	U	NT
ANIMALIA	ARTHROPODA	INSECTA	ODONATA	GOMPHIDAE	Ophiogomphus edmundo	U	NT
ANIMALIA	ARTHROPODA	INSECTA	ODONATA	GOMPHIDAE	Paragomphus henryi	U	NT
ANIMALIA	ARTHROPODA	INSECTA	ODONATA	GOMPHIDAE	Paragomphus tachyerges	U	VU
ANIMALIA	ARTHROPODA	INSECTA	ODONATA	GOMPHIDAE	Perigomphus pallidistylus	U	VU
ANIMALIA	ARTHROPODA	INSECTA	ODONATA	GOMPHIDAE	Phanogomphus westfalli	U	NT
ANIMALIA	ARTHROPODA	INSECTA	ODONATA	GOMPHIDAE	Phyllogomphoides joaquini	U	VU
ANIMALIA	ARTHROPODA	INSECTA	ODONATA	GOMPHIDAE	Progomphus kimminsi	U	NT
ANIMALIA	ARTHROPODA	INSECTA	ODONATA	GOMPHIDAE	Progomphus risi	U	EN
ANIMALIA	ARTHROPODA	INSECTA	ODONATA	GOMPHIDAE	Zephyrogomphus longipositor	U	NT
ANIMALIA	ARTHROPODA	INSECTA	ODONATA	HETERAGRIONIDAE	Heteragrion calendulum	U	EN
ANIMALIA	ARTHROPODA	INSECTA	ODONATA	HETERAGRIONIDAE	Heteragrion eboratum	U	NT
ANIMALIA	ARTHROPODA	INSECTA	ODONATA	HETERAGRIONIDAE	Heteragrion flavovittatum	U	VU
ANIMALIA	ARTHROPODA	INSECTA	ODONATA	HETERAGRIONIDAE	Heteragrion peregrinum	U	CR
ANIMALIA	ARTHROPODA	INSECTA	ODONATA	HYPOLESTIDAE	Hypolestes clara	U	EN
ANIMALIA	ARTHROPODA	INSECTA	ODONATA	HYPOLESTIDAE	Hypolestes hatuey	U	NT
ANIMALIA	ARTHROPODA	INSECTA	ODONATA	HYPOLESTIDAE	Hypolestes trinitatis	U	VU
ANIMALIA	ARTHROPODA	INSECTA	ODONATA	ISOSTICTIDAE	Isosticta gracilior	U	EN
ANIMALIA	ARTHROPODA	INSECTA	ODONATA	ISOSTICTIDAE	Isosticta humilior	U	EN
ANIMALIA	ARTHROPODA	INSECTA	ODONATA	LESTIDAE	Indolestes bellax	U	NT
ANIMALIA	ARTHROPODA	INSECTA	ODONATA	LESTIDAE	Lestes auripennis	U	EN
ANIMALIA	ARTHROPODA	INSECTA	ODONATA	LESTIDAE	Sinhalestes orientalis	U	CR
ANIMALIA	ARTHROPODA	INSECTA	ODONATA	LESTOIDEIDAE	Diphlebia hybridoides	U	NT
ANIMALIA	ARTHROPODA	INSECTA	ODONATA	LESTOIDEIDAE	Lestoidea barbarae	U	VU
ANIMALIA	ARTHROPODA	INSECTA	ODONATA	LESTOIDEIDAE	Lestoidea brevicauda	U	NT
ANIMALIA	ARTHROPODA	INSECTA	ODONATA	LESTOIDEIDAE	Lestoidea lewisiana	U	EN
ANIMALIA	ARTHROPODA	INSECTA	ODONATA	LIBELLULIDAE	Acisoma ascalaphoides	U	EN
ANIMALIA	ARTHROPODA	INSECTA	ODONATA	LIBELLULIDAE	Aethiothemis gamblesi	U	EN
ANIMALIA	ARTHROPODA	INSECTA	ODONATA	LIBELLULIDAE	Atoconeura aethiopica	U	VU
ANIMALIA	ARTHROPODA	INSECTA	ODONATA	LIBELLULIDAE	Brachygonia ophelia	U	EN
ANIMALIA	ARTHROPODA	INSECTA	ODONATA	LIBELLULIDAE	Diplacina arsinoe	U	VU
ANIMALIA	ARTHROPODA	INSECTA	ODONATA	LIBELLULIDAE	Diplacina holgerhungeri	U	EN
ANIMALIA	ARTHROPODA	INSECTA	ODONATA	LIBELLULIDAE	Diplacina persephone	U	VU
ANIMALIA	ARTHROPODA	INSECTA	ODONATA	LIBELLULIDAE	Elga newtonsantosi	U	CR
ANIMALIA	ARTHROPODA	INSECTA	ODONATA	LIBELLULIDAE	Erythrodiplax acantha	U	CR
ANIMALIA	ARTHROPODA	INSECTA	ODONATA	LIBELLULIDAE	Erythrodiplax ana	U	EN
ANIMALIA	ARTHROPODA	INSECTA	ODONATA	LIBELLULIDAE	Erythrodiplax nivea	U	CR
ANIMALIA	ARTHROPODA	INSECTA	ODONATA	LIBELLULIDAE	Hylaeothemis fruhstorferi	U	EN
ANIMALIA	ARTHROPODA	INSECTA	ODONATA	LIBELLULIDAE	Libellula mariae	U	NT
ANIMALIA	ARTHROPODA	INSECTA	ODONATA	LIBELLULIDAE	Micrathyria divergens	U	VU
ANIMALIA	ARTHROPODA	INSECTA	ODONATA	LIBELLULIDAE	Micrathyria kleerekoperi	U	CR
ANIMALIA	ARTHROPODA	INSECTA	ODONATA	LIBELLULIDAE	Micromacromia miraculosa	U	CR
ANIMALIA	ARTHROPODA	INSECTA	ODONATA	LIBELLULIDAE	Nannophyopsis chalcosoma	U	VU
ANIMALIA	ARTHROPODA	INSECTA	ODONATA	LIBELLULIDAE	Orchithemis xanthosoma	U	NT
ANIMALIA	ARTHROPODA	INSECTA	ODONATA	LIBELLULIDAE	Orthetrum lugubre	U	NT
ANIMALIA	ARTHROPODA	INSECTA	ODONATA	LIBELLULIDAE	Orthetrum poecilops	U	VU
ANIMALIA	ARTHROPODA	INSECTA	ODONATA	LIBELLULIDAE	Pseudagrionoptera diotima	U	EN
ANIMALIA	ARTHROPODA	INSECTA	ODONATA	LIBELLULIDAE	Raphismia inermis	U	EN
ANIMALIA	ARTHROPODA	INSECTA	ODONATA	LIBELLULIDAE	Sympetrum dilatatum	U	CR
ANIMALIA	ARTHROPODA	INSECTA	ODONATA	LIBELLULIDAE	Sympetrum evanescens	U	CR
ANIMALIA	ARTHROPODA	INSECTA	ODONATA	LIBELLULIDAE	Sympetrum gracile	U	VU
ANIMALIA	ARTHROPODA	INSECTA	ODONATA	LIBELLULIDAE	Sympetrum maculatum	U	EN
ANIMALIA	ARTHROPODA	INSECTA	ODONATA	LIBELLULIDAE	Tetrathemis yerburii	U	EN
ANIMALIA	ARTHROPODA	INSECTA	ODONATA	LIBELLULIDAE	Thalassothemis marchali	U	EN
ANIMALIA	ARTHROPODA	INSECTA	ODONATA	LIBELLULIDAE	Trithemis nigra	U	NT
ANIMALIA	ARTHROPODA	INSECTA	ODONATA	LIBELLULIDAE	Urothemis luciana	U	NT
ANIMALIA	ARTHROPODA	INSECTA	ODONATA	MACROMIIDAE	Macromia erato	U	VU
ANIMALIA	ARTHROPODA	INSECTA	ODONATA	MACROMIIDAE	Macromia flinti	U	CR
ANIMALIA	ARTHROPODA	INSECTA	ODONATA	MACROMIIDAE	Macromia irina	U	VU
ANIMALIA	ARTHROPODA	INSECTA	ODONATA	MACROMIIDAE	Macromia katae	I	VU
ANIMALIA	ARTHROPODA	INSECTA	ODONATA	MACROMIIDAE	Macromia negrito	U	EN
ANIMALIA	ARTHROPODA	INSECTA	ODONATA	MACROMIIDAE	Phyllomacromia funicularioides	U	NT
ANIMALIA	ARTHROPODA	INSECTA	ODONATA	MACROMIIDAE	Phyllomacromia lamottei	U	NT
ANIMALIA	ARTHROPODA	INSECTA	ODONATA	MEGAPODAGRIONIDAE	Amanipodagrion gilliesi	U	CR
ANIMALIA	ARTHROPODA	INSECTA	ODONATA	MEGAPODAGRIONIDAE	Sciotropis lattkei	U	EN
ANIMALIA	ARTHROPODA	INSECTA	ODONATA	MEGAPODAGRIONIDAE	Teinopodagrion temporale	U	VU
ANIMALIA	ARTHROPODA	INSECTA	ODONATA	MEGAPODAGRIONIDAE	Teinopodagrion vallenatum	U	NT
ANIMALIA	ARTHROPODA	INSECTA	ODONATA	NOT ASSIGNED	Bornargiolestes fuscus	U	NT
ANIMALIA	ARTHROPODA	INSECTA	ODONATA	NOT ASSIGNED	Bornargiolestes reelsi	U	NT
ANIMALIA	ARTHROPODA	INSECTA	ODONATA	NOT ASSIGNED	Idionyx optata	U	NT
ANIMALIA	ARTHROPODA	INSECTA	ODONATA	NOT ASSIGNED	Nesocordulia villiersi	U	EN
ANIMALIA	ARTHROPODA	INSECTA	ODONATA	NOT ASSIGNED	Pseudocordulia circularis	U	NT
ANIMALIA	ARTHROPODA	INSECTA	ODONATA	NOT ASSIGNED	Pseudocordulia elliptica	U	NT
ANIMALIA	ARTHROPODA	INSECTA	ODONATA	PENTAPHLEBIIDAE	Pentaphlebia gamblesi	U	CR
ANIMALIA	ARTHROPODA	INSECTA	ODONATA	PENTAPHLEBIIDAE	Pentaphlebia stahli	U	VU
ANIMALIA	ARTHROPODA	INSECTA	ODONATA	PERILESTIDAE	Perissolestes remus	U	CR
ANIMALIA	ARTHROPODA	INSECTA	ODONATA	PETALURIDAE	Petalura litorea	U	NT
ANIMALIA	ARTHROPODA	INSECTA	ODONATA	PETALURIDAE	Petalura pulcherrima	U	VU
ANIMALIA	ARTHROPODA	INSECTA	ODONATA	PHILOGENIIDAE	Philogenia cristalina	U	VU
ANIMALIA	ARTHROPODA	INSECTA	ODONATA	PHILOGENIIDAE	Philogenia helena	U	NT
ANIMALIA	ARTHROPODA	INSECTA	ODONATA	PHILOGENIIDAE	Philogenia monotis	U	EN
ANIMALIA	ARTHROPODA	INSECTA	ODONATA	PHILOSINIDAE	Rhinagrion reinhardi	U	VU
ANIMALIA	ARTHROPODA	INSECTA	ODONATA	PLATYCNEMIDIDAE	Allocnemis abbotti	U	NT
ANIMALIA	ARTHROPODA	INSECTA	ODONATA	PLATYCNEMIDIDAE	Allocnemis interrupta	U	NT
ANIMALIA	ARTHROPODA	INSECTA	ODONATA	PLATYCNEMIDIDAE	Allocnemis maccleeryi	U	CR
ANIMALIA	ARTHROPODA	INSECTA	ODONATA	PLATYCNEMIDIDAE	Allocnemis mitwabae	U	EN
ANIMALIA	ARTHROPODA	INSECTA	ODONATA	PLATYCNEMIDIDAE	Allocnemis montana	U	EN
ANIMALIA	ARTHROPODA	INSECTA	ODONATA	PLATYCNEMIDIDAE	Allocnemis vicki	U	EN
ANIMALIA	ARTHROPODA	INSECTA	ODONATA	PLATYCNEMIDIDAE	Calicnemia nipalica	U	VU
ANIMALIA	ARTHROPODA	INSECTA	ODONATA	PLATYCNEMIDIDAE	Coeliccia macrostigma	U	EN
ANIMALIA	ARTHROPODA	INSECTA	ODONATA	PLATYCNEMIDIDAE	Coeliccia matok	U	EN
ANIMALIA	ARTHROPODA	INSECTA	ODONATA	PLATYCNEMIDIDAE	Elattoneura caesia	U	EN
ANIMALIA	ARTHROPODA	INSECTA	ODONATA	PLATYCNEMIDIDAE	Elattoneura erythromma	U	NT
ANIMALIA	ARTHROPODA	INSECTA	ODONATA	PLATYCNEMIDIDAE	Elattoneura mauros	U	VU
ANIMALIA	ARTHROPODA	INSECTA	ODONATA	PLATYCNEMIDIDAE	Elattoneura oculata	U	EN
ANIMALIA	ARTHROPODA	INSECTA	ODONATA	PLATYCNEMIDIDAE	Idiocnemis adelbertensis	U	NT
ANIMALIA	ARTHROPODA	INSECTA	ODONATA	PLATYCNEMIDIDAE	Igneocnemis odobeni	U	VU
ANIMALIA	ARTHROPODA	INSECTA	ODONATA	PLATYCNEMIDIDAE	Igneocnemis pistor	U	EN
ANIMALIA	ARTHROPODA	INSECTA	ODONATA	PLATYCNEMIDIDAE	Igneocnemis plebeja	U	EN
ANIMALIA	ARTHROPODA	INSECTA	ODONATA	PLATYCNEMIDIDAE	Igneocnemis polilloensis	U	VU
ANIMALIA	ARTHROPODA	INSECTA	ODONATA	PLATYCNEMIDIDAE	Lieftinckia lairdi	U	EN
ANIMALIA	ARTHROPODA	INSECTA	ODONATA	PLATYCNEMIDIDAE	Matticnemis doi	U	CR
ANIMALIA	ARTHROPODA	INSECTA	ODONATA	PLATYCNEMIDIDAE	Mesocnemis tisi	U	EN
ANIMALIA	ARTHROPODA	INSECTA	ODONATA	PLATYCNEMIDIDAE	Nososticta phoenissa	U	VU
ANIMALIA	ARTHROPODA	INSECTA	ODONATA	PLATYCNEMIDIDAE	Palaiargia traunae	U	VU
ANIMALIA	ARTHROPODA	INSECTA	ODONATA	PLATYCNEMIDIDAE	Prodasineura abbreviata	U	EN
ANIMALIA	ARTHROPODA	INSECTA	ODONATA	PLATYCNEMIDIDAE	Prodasineura quadristigma	U	EN
ANIMALIA	ARTHROPODA	INSECTA	ODONATA	PLATYCNEMIDIDAE	Prodasineura yulan	U	EN
ANIMALIA	ARTHROPODA	INSECTA	ODONATA	PLATYCNEMIDIDAE	Proplatycnemis agrioides	U	NT
ANIMALIA	ARTHROPODA	INSECTA	ODONATA	PLATYCNEMIDIDAE	Proplatycnemis pembipes	U	CR
ANIMALIA	ARTHROPODA	INSECTA	ODONATA	PLATYCNEMIDIDAE	Risiocnemis antoniae	U	EN
ANIMALIA	ARTHROPODA	INSECTA	ODONATA	PLATYCNEMIDIDAE	Risiocnemis corbeti	U	EN
ANIMALIA	ARTHROPODA	INSECTA	ODONATA	PLATYCNEMIDIDAE	Risiocnemis hamalaineni	U	EN
ANIMALIA	ARTHROPODA	INSECTA	ODONATA	PLATYCNEMIDIDAE	Risiocnemis kiautai	U	VU
ANIMALIA	ARTHROPODA	INSECTA	ODONATA	PLATYCNEMIDIDAE	Risiocnemis laguna	U	CR
ANIMALIA	ARTHROPODA	INSECTA	ODONATA	PLATYCNEMIDIDAE	Risiocnemis moroensis	U	EN
ANIMALIA	ARTHROPODA	INSECTA	ODONATA	PLATYCNEMIDIDAE	Risiocnemis pulchra	U	VU
ANIMALIA	ARTHROPODA	INSECTA	ODONATA	PLATYCNEMIDIDAE	Risiocnemis seidenschwarzi	U	CR
ANIMALIA	ARTHROPODA	INSECTA	ODONATA	PLATYSTICTIDAE	Ceylonosticta adami	U	CR
ANIMALIA	ARTHROPODA	INSECTA	ODONATA	PLATYSTICTIDAE	Ceylonosticta austeni	U	CR
ANIMALIA	ARTHROPODA	INSECTA	ODONATA	PLATYSTICTIDAE	Ceylonosticta hilaris	U	CR
ANIMALIA	ARTHROPODA	INSECTA	ODONATA	PLATYSTICTIDAE	Ceylonosticta montana	U	CR
ANIMALIA	ARTHROPODA	INSECTA	ODONATA	PLATYSTICTIDAE	Ceylonosticta submontana	U	CR
ANIMALIA	ARTHROPODA	INSECTA	ODONATA	PLATYSTICTIDAE	Drepanosticta aurita	U	EN
ANIMALIA	ARTHROPODA	INSECTA	ODONATA	PLATYSTICTIDAE	Drepanosticta brownelli	U	NT
ANIMALIA	ARTHROPODA	INSECTA	ODONATA	PLATYSTICTIDAE	Drepanosticta centrosaurus	U	VU
ANIMALIA	ARTHROPODA	INSECTA	ODONATA	PLATYSTICTIDAE	Drepanosticta ceratophora	U	EN
ANIMALIA	ARTHROPODA	INSECTA	ODONATA	PLATYSTICTIDAE	Drepanosticta drusilla	U	VU
ANIMALIA	ARTHROPODA	INSECTA	ODONATA	PLATYSTICTIDAE	Drepanosticta emtrai	U	EN
ANIMALIA	ARTHROPODA	INSECTA	ODONATA	PLATYSTICTIDAE	Drepanosticta furcata	U	CR
ANIMALIA	ARTHROPODA	INSECTA	ODONATA	PLATYSTICTIDAE	Drepanosticta hamalaineni	U	EN
ANIMALIA	ARTHROPODA	INSECTA	ODONATA	PLATYSTICTIDAE	Drepanosticta hamulifera	U	VU
ANIMALIA	ARTHROPODA	INSECTA	ODONATA	PLATYSTICTIDAE	Drepanosticta krios	U	NT
ANIMALIA	ARTHROPODA	INSECTA	ODONATA	PLATYSTICTIDAE	Drepanosticta leonardi	U	EN
ANIMALIA	ARTHROPODA	INSECTA	ODONATA	PLATYSTICTIDAE	Drepanosticta lestoides	U	VU
ANIMALIA	ARTHROPODA	INSECTA	ODONATA	PLATYSTICTIDAE	Drepanosticta makilingia	U	CR
ANIMALIA	ARTHROPODA	INSECTA	ODONATA	PLATYSTICTIDAE	Drepanosticta marsyas	U	EN
ANIMALIA	ARTHROPODA	INSECTA	ODONATA	PLATYSTICTIDAE	Drepanosticta megametta	U	EN
ANIMALIA	ARTHROPODA	INSECTA	ODONATA	PLATYSTICTIDAE	Drepanosticta taurus	U	EN
ANIMALIA	ARTHROPODA	INSECTA	ODONATA	PLATYSTICTIDAE	Drepanosticta wildermuthi	U	EN
ANIMALIA	ARTHROPODA	INSECTA	ODONATA	PLATYSTICTIDAE	Palaemnema baltodanoi	U	EN
ANIMALIA	ARTHROPODA	INSECTA	ODONATA	PLATYSTICTIDAE	Palaemnema chiriquita	U	EN
ANIMALIA	ARTHROPODA	INSECTA	ODONATA	PLATYSTICTIDAE	Palaemnema croceicauda	U	CR
ANIMALIA	ARTHROPODA	INSECTA	ODONATA	PLATYSTICTIDAE	Palaemnema edmondi	U	CR
ANIMALIA	ARTHROPODA	INSECTA	ODONATA	PLATYSTICTIDAE	Palaemnema melanota	U	EN
ANIMALIA	ARTHROPODA	INSECTA	ODONATA	PLATYSTICTIDAE	Palaemnema orientalis	U	EN
ANIMALIA	ARTHROPODA	INSECTA	ODONATA	PLATYSTICTIDAE	Palaemnema reventazoni	U	EN
ANIMALIA	ARTHROPODA	INSECTA	ODONATA	PLATYSTICTIDAE	Protosticta khaosoidaoensis	U	VU
ANIMALIA	ARTHROPODA	INSECTA	ODONATA	PLATYSTICTIDAE	Protosticta kinabaluensis	I	VU
ANIMALIA	ARTHROPODA	INSECTA	ODONATA	PLATYSTICTIDAE	Protosticta plicata	U	CR
ANIMALIA	ARTHROPODA	INSECTA	ODONATA	PLATYSTICTIDAE	Protosticta rozendalorum	U	CR
ANIMALIA	ARTHROPODA	INSECTA	ODONATA	PLATYSTICTIDAE	Protosticta satoi	U	VU
ANIMALIA	ARTHROPODA	INSECTA	ODONATA	PLATYSTICTIDAE	Sulcosticta sierramadrensis	U	EN
ANIMALIA	ARTHROPODA	INSECTA	ODONATA	PLATYSTICTIDAE	Sulcosticta striata	U	EN
ANIMALIA	ARTHROPODA	INSECTA	ODONATA	PLATYSTICTIDAE	Sulcosticta vantoli	U	EN
ANIMALIA	ARTHROPODA	INSECTA	ODONATA	PLATYSTICTIDAE	Telosticta berawan	U	VU
ANIMALIA	ARTHROPODA	INSECTA	ODONATA	PLATYSTICTIDAE	Telosticta dupophila	U	NT
ANIMALIA	ARTHROPODA	INSECTA	ODONATA	PLATYSTICTIDAE	Telosticta gading	U	EN
ANIMALIA	ARTHROPODA	INSECTA	ODONATA	PLATYSTICTIDAE	Telosticta serapi	U	NT
ANIMALIA	ARTHROPODA	INSECTA	ODONATA	PLATYSTICTIDAE	Telosticta ulubaram	U	VU
ANIMALIA	ARTHROPODA	INSECTA	ODONATA	POLYTHORIDAE	Cora lugubris	U	VU
ANIMALIA	ARTHROPODA	INSECTA	ODONATA	POLYTHORIDAE	Stenocora percornuta	U	NT
ANIMALIA	ARTHROPODA	INSECTA	ODONATA	SYNLESTIDAE	Chlorolestes elegans	I	NT
ANIMALIA	ARTHROPODA	INSECTA	ODONATA	SYNLESTIDAE	Ecchlorolestes nylephtha	U	NT
ANIMALIA	ARTHROPODA	INSECTA	ODONATA	SYNLESTIDAE	Episynlestes intermedius	U	VU
ANIMALIA	ARTHROPODA	INSECTA	ODONATA	SYNTHEMISTIDAE	Synthemis ariadne	U	EN
ANIMALIA	ARTHROPODA	INSECTA	ODONATA	SYNTHEMISTIDAE	Synthemis flexicauda	U	EN
ANIMALIA	ARTHROPODA	INSECTA	ODONATA	SYNTHEMISTIDAE	Tonyosynthemis claviculata	U	NT
ANIMALIA	ARTHROPODA	INSECTA	ODONATA	THAUMATONEURIDAE	Paraphlebia zoe	U	VU
ANIMALIA	ARTHROPODA	INSECTA	ORTHOPTERA	ACRIDIDAE	Afrophlaeoba longicornis	U	EN
ANIMALIA	ARTHROPODA	INSECTA	ORTHOPTERA	ACRIDIDAE	Afrophlaeoba usambarica	U	VU
ANIMALIA	ARTHROPODA	INSECTA	ORTHOPTERA	ACRIDIDAE	Allaga ambigua	U	CR
ANIMALIA	ARTHROPODA	INSECTA	ORTHOPTERA	ACRIDIDAE	Anischnansis burtti	U	CR
ANIMALIA	ARTHROPODA	INSECTA	ORTHOPTERA	ACRIDIDAE	Arcyptera brevipennis	U	VU
ANIMALIA	ARTHROPODA	INSECTA	ORTHOPTERA	ACRIDIDAE	Aresceutica morogorica	U	EN
ANIMALIA	ARTHROPODA	INSECTA	ORTHOPTERA	ACRIDIDAE	Aresceutica subnuda	U	EN
ANIMALIA	ARTHROPODA	INSECTA	ORTHOPTERA	ACRIDIDAE	Aulacobothrus popovi	U	VU
ANIMALIA	ARTHROPODA	INSECTA	ORTHOPTERA	ACRIDIDAE	Burttia sylvatica	U	CR
ANIMALIA	ARTHROPODA	INSECTA	ORTHOPTERA	ACRIDIDAE	Caryanda pieli	I	VU
ANIMALIA	ARTHROPODA	INSECTA	ORTHOPTERA	ACRIDIDAE	Chibchacris sturmi	U	VU
ANIMALIA	ARTHROPODA	INSECTA	ORTHOPTERA	ACRIDIDAE	Chorthippus pulloides	U	NT
ANIMALIA	ARTHROPODA	INSECTA	ORTHOPTERA	ACRIDIDAE	Chromochokwea fitzgeraldi	U	VU
ANIMALIA	ARTHROPODA	INSECTA	ORTHOPTERA	ACRIDIDAE	Cyphocerastis uluguruensis	U	CR
ANIMALIA	ARTHROPODA	INSECTA	ORTHOPTERA	ACRIDIDAE	Eucopiocera rubripes	U	VU
ANIMALIA	ARTHROPODA	INSECTA	ORTHOPTERA	ACRIDIDAE	Eupropacris abbreviata	U	CR
ANIMALIA	ARTHROPODA	INSECTA	ORTHOPTERA	ACRIDIDAE	Eupropacris pompalis	U	EN
ANIMALIA	ARTHROPODA	INSECTA	ORTHOPTERA	ACRIDIDAE	Eupropacris uniformis	U	VU
ANIMALIA	ARTHROPODA	INSECTA	ORTHOPTERA	ACRIDIDAE	Galvagniella albanica	U	NT
ANIMALIA	ARTHROPODA	INSECTA	ORTHOPTERA	ACRIDIDAE	Hadrolecocatantops uvinza	U	EN
ANIMALIA	ARTHROPODA	INSECTA	ORTHOPTERA	ACRIDIDAE	Heteracris trimaculata	U	VU
ANIMALIA	ARTHROPODA	INSECTA	ORTHOPTERA	ACRIDIDAE	Ixalidium sjostedti	U	VU
ANIMALIA	ARTHROPODA	INSECTA	ORTHOPTERA	ACRIDIDAE	Ixalidium transiens	U	VU
ANIMALIA	ARTHROPODA	INSECTA	ORTHOPTERA	ACRIDIDAE	Melanoplus lemhiensis	U	VU
ANIMALIA	ARTHROPODA	INSECTA	ORTHOPTERA	ACRIDIDAE	Odontopodisma fallax	U	NT
ANIMALIA	ARTHROPODA	INSECTA	ORTHOPTERA	ACRIDIDAE	Odontopodisma rubripes	U	NT
ANIMALIA	ARTHROPODA	INSECTA	ORTHOPTERA	ACRIDIDAE	Oropodisma chelmosi	U	EN
ANIMALIA	ARTHROPODA	INSECTA	ORTHOPTERA	ACRIDIDAE	Oropodisma erymanthosi	U	VU
ANIMALIA	ARTHROPODA	INSECTA	ORTHOPTERA	ACRIDIDAE	Oropodisma karavica	U	EN
ANIMALIA	ARTHROPODA	INSECTA	ORTHOPTERA	ACRIDIDAE	Oropodisma kyllinii	U	VU
ANIMALIA	ARTHROPODA	INSECTA	ORTHOPTERA	ACRIDIDAE	Oropodisma lagrecai	U	CR
ANIMALIA	ARTHROPODA	INSECTA	ORTHOPTERA	ACRIDIDAE	Oropodisma macedonica	U	VU
ANIMALIA	ARTHROPODA	INSECTA	ORTHOPTERA	ACRIDIDAE	Oropodisma parnassica	U	EN
ANIMALIA	ARTHROPODA	INSECTA	ORTHOPTERA	ACRIDIDAE	Oropodisma taygetosi	U	VU
ANIMALIA	ARTHROPODA	INSECTA	ORTHOPTERA	ACRIDIDAE	Oropodisma tymphrestosi	U	EN
ANIMALIA	ARTHROPODA	INSECTA	ORTHOPTERA	ACRIDIDAE	Oropodisma willemsei	U	CR
ANIMALIA	ARTHROPODA	INSECTA	ORTHOPTERA	ACRIDIDAE	Orphula gracilicornis	U	VU
ANIMALIA	ARTHROPODA	INSECTA	ORTHOPTERA	ACRIDIDAE	Parepistaurus hanangensis	U	VU
ANIMALIA	ARTHROPODA	INSECTA	ORTHOPTERA	ACRIDIDAE	Parepistaurus intermedius	U	VU
ANIMALIA	ARTHROPODA	INSECTA	ORTHOPTERA	ACRIDIDAE	Parepistaurus lindneri	U	EN
ANIMALIA	ARTHROPODA	INSECTA	ORTHOPTERA	ACRIDIDAE	Parepistaurus pugui	U	EN
ANIMALIA	ARTHROPODA	INSECTA	ORTHOPTERA	ACRIDIDAE	Parepistaurus pygmaeus	U	NT
ANIMALIA	ARTHROPODA	INSECTA	ORTHOPTERA	ACRIDIDAE	Parepistaurus robertsoni	U	NT
ANIMALIA	ARTHROPODA	INSECTA	ORTHOPTERA	ACRIDIDAE	Pareuthymia fasciata	U	EN
ANIMALIA	ARTHROPODA	INSECTA	ORTHOPTERA	ACRIDIDAE	Parodontomelus arachniformis	U	VU
ANIMALIA	ARTHROPODA	INSECTA	ORTHOPTERA	ACRIDIDAE	Parodontomelus brachypterus	U	VU
ANIMALIA	ARTHROPODA	INSECTA	ORTHOPTERA	ACRIDIDAE	Parodontomelus luci	U	NT
ANIMALIA	ARTHROPODA	INSECTA	ORTHOPTERA	ACRIDIDAE	Parodontomelus mazumbaiensis	U	VU
ANIMALIA	ARTHROPODA	INSECTA	ORTHOPTERA	ACRIDIDAE	Parodontomelus stoltzei	U	VU
ANIMALIA	ARTHROPODA	INSECTA	ORTHOPTERA	ACRIDIDAE	Parodontomelus verticulus	U	EN
ANIMALIA	ARTHROPODA	INSECTA	ORTHOPTERA	ACRIDIDAE	Peripodisma tymphii	U	EN
ANIMALIA	ARTHROPODA	INSECTA	ORTHOPTERA	ACRIDIDAE	Physocrobylus tessa	U	CR
ANIMALIA	ARTHROPODA	INSECTA	ORTHOPTERA	ACRIDIDAE	Podismopsis keisti	U	VU
ANIMALIA	ARTHROPODA	INSECTA	ORTHOPTERA	ACRIDIDAE	Stenobothrus clavatus	U	EN
ANIMALIA	ARTHROPODA	INSECTA	ORTHOPTERA	ACRIDIDAE	Xerohippus solerii	U	NT
ANIMALIA	ARTHROPODA	INSECTA	ORTHOPTERA	ANOSTOSTOMATIDAE	Gryllotaurus bicornis	U	NT
ANIMALIA	ARTHROPODA	INSECTA	ORTHOPTERA	DERICORYTHIDAE	Dericorys carthagonovae	U	EN
ANIMALIA	ARTHROPODA	INSECTA	ORTHOPTERA	EUSCHMIDTIIDAE	Chromomastax jagoi	U	EN
ANIMALIA	ARTHROPODA	INSECTA	ORTHOPTERA	EUSCHMIDTIIDAE	Chromomastax movogovodia	U	CR
ANIMALIA	ARTHROPODA	INSECTA	ORTHOPTERA	EUSCHMIDTIIDAE	Euschmidtia bidens	U	CR
ANIMALIA	ARTHROPODA	INSECTA	ORTHOPTERA	EUSCHMIDTIIDAE	Euschmidtia burtti	U	CR
ANIMALIA	ARTHROPODA	INSECTA	ORTHOPTERA	EUSCHMIDTIIDAE	Euschmidtia dirshi	U	CR
ANIMALIA	ARTHROPODA	INSECTA	ORTHOPTERA	EUSCHMIDTIIDAE	Euschmidtia fitzgeraldi	U	EN
ANIMALIA	ARTHROPODA	INSECTA	ORTHOPTERA	EUSCHMIDTIIDAE	Euschmidtia phippsi	U	CR
ANIMALIA	ARTHROPODA	INSECTA	ORTHOPTERA	EUSCHMIDTIIDAE	Euschmidtia tangana	U	EN
ANIMALIA	ARTHROPODA	INSECTA	ORTHOPTERA	EUSCHMIDTIIDAE	Euschmidtia uvarovi	U	CR
ANIMALIA	ARTHROPODA	INSECTA	ORTHOPTERA	EUSCHMIDTIIDAE	Euschmidtia viridifasciata	U	CR
ANIMALIA	ARTHROPODA	INSECTA	ORTHOPTERA	GRYLLACRIDIDAE	Abelona michaelisi	U	VU
ANIMALIA	ARTHROPODA	INSECTA	ORTHOPTERA	GRYLLACRIDIDAE	Gryllacris barabensis	U	VU
ANIMALIA	ARTHROPODA	INSECTA	ORTHOPTERA	GRYLLIDAE	Ovaliptila kinzelbachi	U	VU
ANIMALIA	ARTHROPODA	INSECTA	ORTHOPTERA	GRYLLIDAE	Ovaliptila krueperi	U	NT
ANIMALIA	ARTHROPODA	INSECTA	ORTHOPTERA	GRYLLIDAE	Ovaliptila nana	U	VU
ANIMALIA	ARTHROPODA	INSECTA	ORTHOPTERA	GRYLLIDAE	Ovaliptila wettsteini	U	NT
ANIMALIA	ARTHROPODA	INSECTA	ORTHOPTERA	GRYLLIDAE	Valiatrella multiprotubera	U	VU
ANIMALIA	ARTHROPODA	INSECTA	ORTHOPTERA	GRYLLIDAE	Walkerana mira	U	VU
ANIMALIA	ARTHROPODA	INSECTA	ORTHOPTERA	LENTULIDAE	Chromousambilla burtti	U	CR
ANIMALIA	ARTHROPODA	INSECTA	ORTHOPTERA	LENTULIDAE	Chromousambilla robertsoni	U	NT
ANIMALIA	ARTHROPODA	INSECTA	ORTHOPTERA	LENTULIDAE	Mecostiboides physalus	U	EN
ANIMALIA	ARTHROPODA	INSECTA	ORTHOPTERA	LENTULIDAE	Mecostibus burtti	U	EN
ANIMALIA	ARTHROPODA	INSECTA	ORTHOPTERA	LENTULIDAE	Mecostibus leprosus	U	VU
ANIMALIA	ARTHROPODA	INSECTA	ORTHOPTERA	LENTULIDAE	Mecostibus minor	U	VU
ANIMALIA	ARTHROPODA	INSECTA	ORTHOPTERA	LENTULIDAE	Mecostibus sublaevis	U	NT
ANIMALIA	ARTHROPODA	INSECTA	ORTHOPTERA	LENTULIDAE	Rhainopomma montanum	U	VU
ANIMALIA	ARTHROPODA	INSECTA	ORTHOPTERA	LENTULIDAE	Rhainopomma usambaricum	U	NT
ANIMALIA	ARTHROPODA	INSECTA	ORTHOPTERA	LENTULIDAE	Rhainopomma wapugu	U	EN
ANIMALIA	ARTHROPODA	INSECTA	ORTHOPTERA	LENTULIDAE	Usambilla affinis	U	NT
ANIMALIA	ARTHROPODA	INSECTA	ORTHOPTERA	LENTULIDAE	Usambilla chlorophrygana	U	VU
ANIMALIA	ARTHROPODA	INSECTA	ORTHOPTERA	LENTULIDAE	Usambilla haematogramma	U	VU
ANIMALIA	ARTHROPODA	INSECTA	ORTHOPTERA	PAMPHAGIDAE	Acinipe eulaliae	U	NT
ANIMALIA	ARTHROPODA	INSECTA	ORTHOPTERA	PAMPHAGIDAE	Acrostira euphorbiae	U	CR
ANIMALIA	ARTHROPODA	INSECTA	ORTHOPTERA	PAMPHAGIDAE	Glyphanus obtusus	U	EN
ANIMALIA	ARTHROPODA	INSECTA	ORTHOPTERA	PAMPHAGIDAE	Glyphotmethis heldreichi	U	NT
ANIMALIA	ARTHROPODA	INSECTA	ORTHOPTERA	PAMPHAGIDAE	Orchamus gracilis	U	EN
ANIMALIA	ARTHROPODA	INSECTA	ORTHOPTERA	PAMPHAGIDAE	Orchamus kaltenbachi	U	EN
ANIMALIA	ARTHROPODA	INSECTA	ORTHOPTERA	PAMPHAGIDAE	Paranocarodes chopardi	U	EN
ANIMALIA	ARTHROPODA	INSECTA	ORTHOPTERA	PHALANGOPSIDAE	Luzara rufipennis	U	NT
ANIMALIA	ARTHROPODA	INSECTA	ORTHOPTERA	PNEUMOROIDAE	Physemacris papillosa	U	EN
ANIMALIA	ARTHROPODA	INSECTA	ORTHOPTERA	PNEUMOROIDAE	Physophorina livingstonii	U	EN
ANIMALIA	ARTHROPODA	INSECTA	ORTHOPTERA	PNEUMOROIDAE	Physophorina miranda	U	EN
ANIMALIA	ARTHROPODA	INSECTA	ORTHOPTERA	PNEUMOROIDAE	Prostalia granulata	U	EN
ANIMALIA	ARTHROPODA	INSECTA	ORTHOPTERA	PYRGACRIDIDAE	Pyrgacris descampsi	U	CR
ANIMALIA	ARTHROPODA	INSECTA	ORTHOPTERA	PYRGACRIDIDAE	Pyrgacris relictus	U	CR
ANIMALIA	ARTHROPODA	INSECTA	ORTHOPTERA	PYRGOMORPHIDAE	Pyrgomorphula serbica	U	CR
ANIMALIA	ARTHROPODA	INSECTA	ORTHOPTERA	RHAPHIDOPHORIDAE	Dolichopoda graeca	U	VU
ANIMALIA	ARTHROPODA	INSECTA	ORTHOPTERA	RHAPHIDOPHORIDAE	Dolichopoda petrochilosi	U	VU
ANIMALIA	ARTHROPODA	INSECTA	ORTHOPTERA	RHAPHIDOPHORIDAE	Rhaphidophora exigua	U	VU
ANIMALIA	ARTHROPODA	INSECTA	ORTHOPTERA	RHAPHIDOPHORIDAE	Rhaphidophora invalida	U	VU
ANIMALIA	ARTHROPODA	INSECTA	ORTHOPTERA	TETRIGIDAE	Andriana hancocki	U	CR
ANIMALIA	ARTHROPODA	INSECTA	ORTHOPTERA	TETRIGIDAE	Andriana intermedia	U	VU
ANIMALIA	ARTHROPODA	INSECTA	ORTHOPTERA	TETRIGIDAE	Andriana tertia	U	VU
ANIMALIA	ARTHROPODA	INSECTA	ORTHOPTERA	TETRIGIDAE	Charagotettix longispinis	U	EN
ANIMALIA	ARTHROPODA	INSECTA	ORTHOPTERA	TETRIGIDAE	Charagotettix lucubensis	U	EN
ANIMALIA	ARTHROPODA	INSECTA	ORTHOPTERA	TETRIGIDAE	Charagotettix sogai	U	NT
ANIMALIA	ARTHROPODA	INSECTA	ORTHOPTERA	TETRIGIDAE	Charagotettix stenocnemis	U	VU
ANIMALIA	ARTHROPODA	INSECTA	ORTHOPTERA	TETRIGIDAE	Cryptotettix fanovana	U	NT
ANIMALIA	ARTHROPODA	INSECTA	ORTHOPTERA	TETRIGIDAE	Cryptotettix insularis	U	CR
ANIMALIA	ARTHROPODA	INSECTA	ORTHOPTERA	TETRIGIDAE	Cryptotettix macrophthalmus	U	EN
ANIMALIA	ARTHROPODA	INSECTA	ORTHOPTERA	TETRIGIDAE	Cryptotettix spinilobus	U	EN
ANIMALIA	ARTHROPODA	INSECTA	ORTHOPTERA	TETRIGIDAE	Eurybiades cerastes	U	EN
ANIMALIA	ARTHROPODA	INSECTA	ORTHOPTERA	TETRIGIDAE	Holocerus lucifer	U	NT
ANIMALIA	ARTHROPODA	INSECTA	ORTHOPTERA	TETRIGIDAE	Hovacris undulata	U	EN
ANIMALIA	ARTHROPODA	INSECTA	ORTHOPTERA	TETRIGIDAE	Hybotettix camelus	U	CR
ANIMALIA	ARTHROPODA	INSECTA	ORTHOPTERA	TETRIGIDAE	Hybotettix humeralis	U	EN
ANIMALIA	ARTHROPODA	INSECTA	ORTHOPTERA	TETRIGIDAE	Isandrus gibbosus	U	NT
ANIMALIA	ARTHROPODA	INSECTA	ORTHOPTERA	TETRIGIDAE	Lepocranus fuscus	U	EN
ANIMALIA	ARTHROPODA	INSECTA	ORTHOPTERA	TETRIGIDAE	Microthymochares pullus	U	CR
ANIMALIA	ARTHROPODA	INSECTA	ORTHOPTERA	TETRIGIDAE	Notocerus cornutus	U	EN
ANIMALIA	ARTHROPODA	INSECTA	ORTHOPTERA	TETRIGIDAE	Notocerus formidabilis	U	NT
ANIMALIA	ARTHROPODA	INSECTA	ORTHOPTERA	TETRIGIDAE	Ocytettix latihumerus	U	NT
ANIMALIA	ARTHROPODA	INSECTA	ORTHOPTERA	TETRIGIDAE	Oxytettix cataphractus	U	NT
ANIMALIA	ARTHROPODA	INSECTA	ORTHOPTERA	TETRIGIDAE	Oxytettix hastatus	U	NT
ANIMALIA	ARTHROPODA	INSECTA	ORTHOPTERA	TETRIGIDAE	Oxytettix macrocerus	U	NT
ANIMALIA	ARTHROPODA	INSECTA	ORTHOPTERA	TETRIGIDAE	Procytettix hova	U	CR
ANIMALIA	ARTHROPODA	INSECTA	ORTHOPTERA	TETRIGIDAE	Pseudosystolederus follvikae	U	VU
ANIMALIA	ARTHROPODA	INSECTA	ORTHOPTERA	TETRIGIDAE	Saussurella acuticornis	U	VU
ANIMALIA	ARTHROPODA	INSECTA	ORTHOPTERA	TETRIGIDAE	Silanotettix baroides	U	NT
ANIMALIA	ARTHROPODA	INSECTA	ORTHOPTERA	TETRIGIDAE	Silanotettix notangulus	U	NT
ANIMALIA	ARTHROPODA	INSECTA	ORTHOPTERA	TETRIGIDAE	Tetrix transsylvanica	U	EN
ANIMALIA	ARTHROPODA	INSECTA	ORTHOPTERA	TETRIGIDAE	Thymochares bolivari	U	NT
ANIMALIA	ARTHROPODA	INSECTA	ORTHOPTERA	TETRIGIDAE	Thymochares crassipes	U	NT
ANIMALIA	ARTHROPODA	INSECTA	ORTHOPTERA	TETRIGIDAE	Thymochares delphini	U	CR
ANIMALIA	ARTHROPODA	INSECTA	ORTHOPTERA	TETRIGIDAE	Thymochares exiguus	U	NT
ANIMALIA	ARTHROPODA	INSECTA	ORTHOPTERA	TETRIGIDAE	Thymochares frontanguolus	U	NT
ANIMALIA	ARTHROPODA	INSECTA	ORTHOPTERA	TETRIGIDAE	Thymochares galeatus	U	NT
ANIMALIA	ARTHROPODA	INSECTA	ORTHOPTERA	TETRIGIDAE	Thymochares modestus	U	NT
ANIMALIA	ARTHROPODA	INSECTA	ORTHOPTERA	TETRIGIDAE	Thymochares pieraggii	U	VU
ANIMALIA	ARTHROPODA	INSECTA	ORTHOPTERA	TETRIGIDAE	Thymochares sambavana	U	NT
ANIMALIA	ARTHROPODA	INSECTA	ORTHOPTERA	TETTIGONIIDAE	Acilacris kristinae	U	CR
ANIMALIA	ARTHROPODA	INSECTA	ORTHOPTERA	TETTIGONIIDAE	Aerotegmina megaloptera	U	CR
ANIMALIA	ARTHROPODA	INSECTA	ORTHOPTERA	TETTIGONIIDAE	Aerotegmina shengenae	U	NT
ANIMALIA	ARTHROPODA	INSECTA	ORTHOPTERA	TETTIGONIIDAE	Aerotegmina taitensis	U	EN
ANIMALIA	ARTHROPODA	INSECTA	ORTHOPTERA	TETTIGONIIDAE	Afroanthracites usambaricus	U	VU
ANIMALIA	ARTHROPODA	INSECTA	ORTHOPTERA	TETTIGONIIDAE	Afroanthracites viridis	U	NT
ANIMALIA	ARTHROPODA	INSECTA	ORTHOPTERA	TETTIGONIIDAE	Afrophisis flagellata	U	NT
ANIMALIA	ARTHROPODA	INSECTA	ORTHOPTERA	TETTIGONIIDAE	Afrophisis mazumbaiensis	U	NT
ANIMALIA	ARTHROPODA	INSECTA	ORTHOPTERA	TETTIGONIIDAE	Afrophisis pseudoflagellata	U	EN
ANIMALIA	ARTHROPODA	INSECTA	ORTHOPTERA	TETTIGONIIDAE	Afrophisis tanzanica	U	NT
ANIMALIA	ARTHROPODA	INSECTA	ORTHOPTERA	TETTIGONIIDAE	Andreiniimon nuptialis	U	VU
ANIMALIA	ARTHROPODA	INSECTA	ORTHOPTERA	TETTIGONIIDAE	Aroegas nigroornatus	U	CR
ANIMALIA	ARTHROPODA	INSECTA	ORTHOPTERA	TETTIGONIIDAE	Arytropteris basalis	U	VU
ANIMALIA	ARTHROPODA	INSECTA	ORTHOPTERA	TETTIGONIIDAE	Arytropteris pondo	U	CR
ANIMALIA	ARTHROPODA	INSECTA	ORTHOPTERA	TETTIGONIIDAE	Austrodontura castletoni	U	CR
ANIMALIA	ARTHROPODA	INSECTA	ORTHOPTERA	TETTIGONIIDAE	Dysonia alipes	U	VU
ANIMALIA	ARTHROPODA	INSECTA	ORTHOPTERA	TETTIGONIIDAE	Eupholidoptera cretica	U	VU
ANIMALIA	ARTHROPODA	INSECTA	ORTHOPTERA	TETTIGONIIDAE	Eupholidoptera gemellata	U	VU
ANIMALIA	ARTHROPODA	INSECTA	ORTHOPTERA	TETTIGONIIDAE	Eupholidoptera mariannae	U	VU
ANIMALIA	ARTHROPODA	INSECTA	ORTHOPTERA	TETTIGONIIDAE	Eupholidoptera pallipes	U	VU
ANIMALIA	ARTHROPODA	INSECTA	ORTHOPTERA	TETTIGONIIDAE	Grammadera chapadensis	U	NT
ANIMALIA	ARTHROPODA	INSECTA	ORTHOPTERA	TETTIGONIIDAE	Griffiniana duplessisae	U	CR
ANIMALIA	ARTHROPODA	INSECTA	ORTHOPTERA	TETTIGONIIDAE	Isophya gulae	U	CR
ANIMALIA	ARTHROPODA	INSECTA	ORTHOPTERA	TETTIGONIIDAE	Isophya zubowskii	U	EN
ANIMALIA	ARTHROPODA	INSECTA	ORTHOPTERA	TETTIGONIIDAE	Oxyprora flavicornis	U	NT
ANIMALIA	ARTHROPODA	INSECTA	ORTHOPTERA	TETTIGONIIDAE	Pachytrachis frater	U	EN
ANIMALIA	ARTHROPODA	INSECTA	ORTHOPTERA	TETTIGONIIDAE	Pantecphylus kamerunus	U	VU
ANIMALIA	ARTHROPODA	INSECTA	ORTHOPTERA	TETTIGONIIDAE	Paradecolya briseferi	U	CR
ANIMALIA	ARTHROPODA	INSECTA	ORTHOPTERA	TETTIGONIIDAE	Peringueyella zulu	U	CR
ANIMALIA	ARTHROPODA	INSECTA	ORTHOPTERA	TETTIGONIIDAE	Poecilimon gracilioides	U	EN
ANIMALIA	ARTHROPODA	INSECTA	ORTHOPTERA	TETTIGONIIDAE	Poecilimon heinrichi	L	NT
ANIMALIA	ARTHROPODA	INSECTA	ORTHOPTERA	TETTIGONIIDAE	Poecilimon jablanicensis	U	NT
ANIMALIA	ARTHROPODA	INSECTA	ORTHOPTERA	TETTIGONIIDAE	Poecilimon tauricus	U	NT
ANIMALIA	ARTHROPODA	INSECTA	ORTHOPTERA	TETTIGONIIDAE	Pomatonota dregii	U	VU
ANIMALIA	ARTHROPODA	INSECTA	ORTHOPTERA	TETTIGONIIDAE	Psorodonotus fieberi	U	NT
ANIMALIA	ARTHROPODA	INSECTA	ORTHOPTERA	TETTIGONIIDAE	Rhacocleis trilobata	U	CR
ANIMALIA	ARTHROPODA	INSECTA	ORTHOPTERA	TETTIGONIIDAE	Rodriguesiophisis spinifera	U	CR
ANIMALIA	ARTHROPODA	INSECTA	ORTHOPTERA	TETTIGONIIDAE	Saga campbelli	U	NT
ANIMALIA	ARTHROPODA	INSECTA	ORTHOPTERA	TETTIGONIIDAE	Saga gracilis	U	VU
ANIMALIA	ARTHROPODA	INSECTA	ORTHOPTERA	TETTIGONIIDAE	Squamiana squamiptera	U	NT
ANIMALIA	ARTHROPODA	INSECTA	ORTHOPTERA	TETTIGONIIDAE	Stictophaula coco	U	NT
ANIMALIA	ARTHROPODA	INSECTA	ORTHOPTERA	TETTIGONIIDAE	Tettigonia savignyi	U	VU
ANIMALIA	ARTHROPODA	INSECTA	ORTHOPTERA	TETTIGONIIDAE	Thoracistus peringueyi	U	CR
ANIMALIA	ARTHROPODA	INSECTA	ORTHOPTERA	TETTIGONIIDAE	Thoracistus viridicrus	U	VU
ANIMALIA	ARTHROPODA	INSECTA	ORTHOPTERA	TETTIGONIIDAE	Xizicus laminatus	U	EN
ANIMALIA	ARTHROPODA	INSECTA	ORTHOPTERA	THERICLEIDAE	Acanthothericles bicoloripes	U	CR
ANIMALIA	ARTHROPODA	INSECTA	ORTHOPTERA	TRIGONIDIIDAE	Metioche payendeei	U	CR
ANIMALIA	ARTHROPODA	INSECTA	PHASMIDA	PHASMATIDAE	Cigarrophasma tessellatum	I	NT
ANIMALIA	ARTHROPODA	INSECTA	PHASMIDA	PHASMATIDAE	Dryococelus australis	U	CR
ANIMALIA	ARTHROPODA	INSECTA	PHASMIDA	PHYLLIIDAE	Phyllium monteithi	I	NT
ANIMALIA	ARTHROPODA	INSECTA	PHASMIDA	Pseudophasmatidae	Peruphasma schultei	I	CR
ANIMALIA	ARTHROPODA	INSECTA	PHTHIRAPTERA	HAEMATOPINIDAE	Haematopinus oliveri	U	CR
ANIMALIA	ARTHROPODA	MALACOSTRACA	AMPHIPODA	TALITRIDAE	Spelaeorchestia kiloana	U	EN
ANIMALIA	ARTHROPODA	MALACOSTRACA	DECAPODA	ALPHEIDAE	Alpheus cyanoteles	U	EN
ANIMALIA	ARTHROPODA	MALACOSTRACA	DECAPODA	ALPHEIDAE	Potamalpheops amnicus	I	EN
ANIMALIA	ARTHROPODA	MALACOSTRACA	DECAPODA	ALPHEIDAE	Potamalpheops haugi	I	EN
ANIMALIA	ARTHROPODA	MALACOSTRACA	DECAPODA	ASTACIDAE	Astacus astacus	L	VU
ANIMALIA	ARTHROPODA	MALACOSTRACA	DECAPODA	ASTACIDAE	Austropotamobius pallipes	U	EN
ANIMALIA	ARTHROPODA	MALACOSTRACA	DECAPODA	ATYIDAE	Atya brachyrhinus	U	CR
ANIMALIA	ARTHROPODA	MALACOSTRACA	DECAPODA	ATYIDAE	Atya intermedia	I	EN
ANIMALIA	ARTHROPODA	MALACOSTRACA	DECAPODA	ATYIDAE	Atyoida bisulcata	U	NT
ANIMALIA	ARTHROPODA	MALACOSTRACA	DECAPODA	ATYIDAE	Caridina ablepsia	U	VU
ANIMALIA	ARTHROPODA	MALACOSTRACA	DECAPODA	ATYIDAE	Caridina acuta	U	VU
ANIMALIA	ARTHROPODA	MALACOSTRACA	DECAPODA	ATYIDAE	Caridina anislaq	I	VU
ANIMALIA	ARTHROPODA	MALACOSTRACA	DECAPODA	ATYIDAE	Caridina annandalei	U	EN
ANIMALIA	ARTHROPODA	MALACOSTRACA	DECAPODA	ATYIDAE	Caridina apodosis	I	CR
ANIMALIA	ARTHROPODA	MALACOSTRACA	DECAPODA	ATYIDAE	Caridina batuan	I	VU
ANIMALIA	ARTHROPODA	MALACOSTRACA	DECAPODA	ATYIDAE	Caridina boholensis	I	VU
ANIMALIA	ARTHROPODA	MALACOSTRACA	DECAPODA	ATYIDAE	Caridina bunyonyiensis	I	VU
ANIMALIA	ARTHROPODA	MALACOSTRACA	DECAPODA	ATYIDAE	Caridina caerulea	I	VU
ANIMALIA	ARTHROPODA	MALACOSTRACA	DECAPODA	ATYIDAE	Caridina camaro	U	VU
ANIMALIA	ARTHROPODA	MALACOSTRACA	DECAPODA	ATYIDAE	Caridina caverna	U	VU
ANIMALIA	ARTHROPODA	MALACOSTRACA	DECAPODA	ATYIDAE	Caridina cavernicola	U	VU
ANIMALIA	ARTHROPODA	MALACOSTRACA	DECAPODA	ATYIDAE	Caridina demenica	U	VU
ANIMALIA	ARTHROPODA	MALACOSTRACA	DECAPODA	ATYIDAE	Caridina dennerli	L	CR
ANIMALIA	ARTHROPODA	MALACOSTRACA	DECAPODA	ATYIDAE	Caridina dianchiensis	U	VU
ANIMALIA	ARTHROPODA	MALACOSTRACA	DECAPODA	ATYIDAE	Caridina ensifera	I	VU
ANIMALIA	ARTHROPODA	MALACOSTRACA	DECAPODA	ATYIDAE	Caridina feixiana	U	VU
ANIMALIA	ARTHROPODA	MALACOSTRACA	DECAPODA	ATYIDAE	Caridina formosae	I	NT
ANIMALIA	ARTHROPODA	MALACOSTRACA	DECAPODA	ATYIDAE	Caridina glaubrechti	L	CR
ANIMALIA	ARTHROPODA	MALACOSTRACA	DECAPODA	ATYIDAE	Caridina gordonae	I	VU
ANIMALIA	ARTHROPODA	MALACOSTRACA	DECAPODA	ATYIDAE	Caridina gortio	I	VU
ANIMALIA	ARTHROPODA	MALACOSTRACA	DECAPODA	ATYIDAE	Caridina guangxiensis	U	VU
ANIMALIA	ARTHROPODA	MALACOSTRACA	DECAPODA	ATYIDAE	Caridina holthuisi	L	EN
ANIMALIA	ARTHROPODA	MALACOSTRACA	DECAPODA	ATYIDAE	Caridina lanceolata	L	CR
ANIMALIA	ARTHROPODA	MALACOSTRACA	DECAPODA	ATYIDAE	Caridina linduensis	U	CR
ANIMALIA	ARTHROPODA	MALACOSTRACA	DECAPODA	ATYIDAE	Caridina lingkonae	L	CR
ANIMALIA	ARTHROPODA	MALACOSTRACA	DECAPODA	ATYIDAE	Caridina loehae	L	CR
ANIMALIA	ARTHROPODA	MALACOSTRACA	DECAPODA	ATYIDAE	Caridina longidigita	U	VU
ANIMALIA	ARTHROPODA	MALACOSTRACA	DECAPODA	ATYIDAE	Caridina maculata	U	EN
ANIMALIA	ARTHROPODA	MALACOSTRACA	DECAPODA	ATYIDAE	Caridina masapi	L	CR
ANIMALIA	ARTHROPODA	MALACOSTRACA	DECAPODA	ATYIDAE	Caridina mauritii	I	NT
ANIMALIA	ARTHROPODA	MALACOSTRACA	DECAPODA	ATYIDAE	Caridina mengae	U	VU
ANIMALIA	ARTHROPODA	MALACOSTRACA	DECAPODA	ATYIDAE	Caridina meridonalis	I	NT
ANIMALIA	ARTHROPODA	MALACOSTRACA	DECAPODA	ATYIDAE	Caridina mindanao	U	EN
ANIMALIA	ARTHROPODA	MALACOSTRACA	DECAPODA	ATYIDAE	Caridina minidentata	I	VU
ANIMALIA	ARTHROPODA	MALACOSTRACA	DECAPODA	ATYIDAE	Caridina parvula	L	CR
ANIMALIA	ARTHROPODA	MALACOSTRACA	DECAPODA	ATYIDAE	Caridina profundicola	I	CR
ANIMALIA	ARTHROPODA	MALACOSTRACA	DECAPODA	ATYIDAE	Caridina pseudonilotica	I	VU
ANIMALIA	ARTHROPODA	MALACOSTRACA	DECAPODA	ATYIDAE	Caridina richtersi	I	NT
ANIMALIA	ARTHROPODA	MALACOSTRACA	DECAPODA	ATYIDAE	Caridina samar	I	VU
ANIMALIA	ARTHROPODA	MALACOSTRACA	DECAPODA	ATYIDAE	Caridina sarasinorum	U	VU
ANIMALIA	ARTHROPODA	MALACOSTRACA	DECAPODA	ATYIDAE	Caridina semiblepsia	U	VU
ANIMALIA	ARTHROPODA	MALACOSTRACA	DECAPODA	ATYIDAE	Caridina sodenensis	I	VU
ANIMALIA	ARTHROPODA	MALACOSTRACA	DECAPODA	ATYIDAE	Caridina spathulirostris	I	NT
ANIMALIA	ARTHROPODA	MALACOSTRACA	DECAPODA	ATYIDAE	Caridina spinata	L	CR
ANIMALIA	ARTHROPODA	MALACOSTRACA	DECAPODA	ATYIDAE	Caridina spongicola	I	CR
ANIMALIA	ARTHROPODA	MALACOSTRACA	DECAPODA	ATYIDAE	Caridina striata	L	CR
ANIMALIA	ARTHROPODA	MALACOSTRACA	DECAPODA	ATYIDAE	Caridina subventralis	I	CR
ANIMALIA	ARTHROPODA	MALACOSTRACA	DECAPODA	ATYIDAE	Caridina tenuirostris	L	CR
ANIMALIA	ARTHROPODA	MALACOSTRACA	DECAPODA	ATYIDAE	Caridina thermophila	U	EN
ANIMALIA	ARTHROPODA	MALACOSTRACA	DECAPODA	ATYIDAE	Caridina trifasciata	U	VU
ANIMALIA	ARTHROPODA	MALACOSTRACA	DECAPODA	ATYIDAE	Caridina tumida	I	CR
ANIMALIA	ARTHROPODA	MALACOSTRACA	DECAPODA	ATYIDAE	Caridina valencia	I	VU
ANIMALIA	ARTHROPODA	MALACOSTRACA	DECAPODA	ATYIDAE	Caridina woltereckae	L	CR
ANIMALIA	ARTHROPODA	MALACOSTRACA	DECAPODA	ATYIDAE	Caridina yilong	I	CR
ANIMALIA	ARTHROPODA	MALACOSTRACA	DECAPODA	ATYIDAE	Edoneus erwini	I	VU
ANIMALIA	ARTHROPODA	MALACOSTRACA	DECAPODA	ATYIDAE	Edoneus marulas	I	VU
ANIMALIA	ARTHROPODA	MALACOSTRACA	DECAPODA	ATYIDAE	Edoneus sketi	I	VU
ANIMALIA	ARTHROPODA	MALACOSTRACA	DECAPODA	ATYIDAE	Gallocaris inermis	U	NT
ANIMALIA	ARTHROPODA	MALACOSTRACA	DECAPODA	ATYIDAE	Lancaris kumariae	U	CR
ANIMALIA	ARTHROPODA	MALACOSTRACA	DECAPODA	ATYIDAE	Lancaris singhalensis	I	NT
ANIMALIA	ARTHROPODA	MALACOSTRACA	DECAPODA	ATYIDAE	Marosina brevirostris	U	VU
ANIMALIA	ARTHROPODA	MALACOSTRACA	DECAPODA	ATYIDAE	Marosina longirostris	U	VU
ANIMALIA	ARTHROPODA	MALACOSTRACA	DECAPODA	ATYIDAE	Neocaridina brevidactyla	U	VU
ANIMALIA	ARTHROPODA	MALACOSTRACA	DECAPODA	ATYIDAE	Palaemonias alabamae	U	EN
ANIMALIA	ARTHROPODA	MALACOSTRACA	DECAPODA	ATYIDAE	Paracaridina longispina	I	VU
ANIMALIA	ARTHROPODA	MALACOSTRACA	DECAPODA	ATYIDAE	Parisia deharvengi	I	VU
ANIMALIA	ARTHROPODA	MALACOSTRACA	DECAPODA	ATYIDAE	Parisia macrophora	I	VU
ANIMALIA	ARTHROPODA	MALACOSTRACA	DECAPODA	ATYIDAE	Pycneus morsitans	U	NT
ANIMALIA	ARTHROPODA	MALACOSTRACA	DECAPODA	ATYIDAE	Sinodina gregoriana	I	EN
ANIMALIA	ARTHROPODA	MALACOSTRACA	DECAPODA	ATYIDAE	Stygiocaris lancifera	U	VU
ANIMALIA	ARTHROPODA	MALACOSTRACA	DECAPODA	ATYIDAE	Stygiocaris stylifera	U	VU
ANIMALIA	ARTHROPODA	MALACOSTRACA	DECAPODA	ATYIDAE	Typhlatya taina	I	VU
ANIMALIA	ARTHROPODA	MALACOSTRACA	DECAPODA	ATYIDAE	Typhlocaridina lanceifrons	U	VU
ANIMALIA	ARTHROPODA	MALACOSTRACA	DECAPODA	ATYIDAE	Typhlocaridina liui	U	VU
ANIMALIA	ARTHROPODA	MALACOSTRACA	DECAPODA	ATYIDAE	Typhlocaridina semityphlata	U	VU
ANIMALIA	ARTHROPODA	MALACOSTRACA	DECAPODA	CAMBARIDAE	Cambarellus patzcuarensis	U	EN
ANIMALIA	ARTHROPODA	MALACOSTRACA	DECAPODA	CAMBARIDAE	Cambarellus prolixus	I	CR
ANIMALIA	ARTHROPODA	MALACOSTRACA	DECAPODA	CAMBARIDAE	Cambarus aculabrum	U	CR
ANIMALIA	ARTHROPODA	MALACOSTRACA	DECAPODA	CAMBARIDAE	Cambarus clivosus	U	VU
ANIMALIA	ARTHROPODA	MALACOSTRACA	DECAPODA	CAMBARIDAE	Cambarus elkensis	U	VU
ANIMALIA	ARTHROPODA	MALACOSTRACA	DECAPODA	CAMBARIDAE	Cambarus setosus	U	NT
ANIMALIA	ARTHROPODA	MALACOSTRACA	DECAPODA	CAMBARIDAE	Cambarus zophonastes	I	CR
ANIMALIA	ARTHROPODA	MALACOSTRACA	DECAPODA	CAMBARIDAE	Fallicambarus gordoni	U	NT
ANIMALIA	ARTHROPODA	MALACOSTRACA	DECAPODA	CAMBARIDAE	Fallicambarus hortoni	U	CR
ANIMALIA	ARTHROPODA	MALACOSTRACA	DECAPODA	CAMBARIDAE	Fallicambarus petilicarpus	U	EN
ANIMALIA	ARTHROPODA	MALACOSTRACA	DECAPODA	CAMBARIDAE	Orconectes bisectus	I	VU
ANIMALIA	ARTHROPODA	MALACOSTRACA	DECAPODA	CAMBARIDAE	Orconectes eupunctus	U	VU
ANIMALIA	ARTHROPODA	MALACOSTRACA	DECAPODA	CAMBARIDAE	Orconectes hartfieldi	I	VU
ANIMALIA	ARTHROPODA	MALACOSTRACA	DECAPODA	CAMBARIDAE	Orconectes jeffersoni	I	EN
ANIMALIA	ARTHROPODA	MALACOSTRACA	DECAPODA	CAMBARIDAE	Orconectes margorectus	I	NT
ANIMALIA	ARTHROPODA	MALACOSTRACA	DECAPODA	CAMBARIDAE	Orconectes saxatilis	I	VU
ANIMALIA	ARTHROPODA	MALACOSTRACA	DECAPODA	CAMBARIDAE	Orconectes shoupi	I	EN
ANIMALIA	ARTHROPODA	MALACOSTRACA	DECAPODA	CAMBARIDAE	Orconectes wrighti	I	VU
ANIMALIA	ARTHROPODA	MALACOSTRACA	DECAPODA	CAMBARIDAE	Procambarus bouvieri	I	EN
ANIMALIA	ARTHROPODA	MALACOSTRACA	DECAPODA	CAMBARIDAE	Procambarus catemacoensis	I	CR
ANIMALIA	ARTHROPODA	MALACOSTRACA	DECAPODA	CAMBARIDAE	Procambarus cuetzalanae	U	NT
ANIMALIA	ARTHROPODA	MALACOSTRACA	DECAPODA	CAMBARIDAE	Procambarus digueti	U	EN
ANIMALIA	ARTHROPODA	MALACOSTRACA	DECAPODA	CAMBARIDAE	Procambarus lagniappe	U	NT
ANIMALIA	ARTHROPODA	MALACOSTRACA	DECAPODA	CAMBARIDAE	Procambarus milleri	I	EN
ANIMALIA	ARTHROPODA	MALACOSTRACA	DECAPODA	CAMBARIDAE	Procambarus paradoxus	I	CR
ANIMALIA	ARTHROPODA	MALACOSTRACA	DECAPODA	CAMBARIDAE	Procambarus pictus	I	NT
ANIMALIA	ARTHROPODA	MALACOSTRACA	DECAPODA	CAMBARIDAE	Procambarus vazquezae	I	NT
ANIMALIA	ARTHROPODA	MALACOSTRACA	DECAPODA	CAMBARIDAE	Procambarus zihuateutlensis	U	EN
ANIMALIA	ARTHROPODA	MALACOSTRACA	DECAPODA	DESMOCARIDIDAE	Desmocaris bislineata	I	EN
ANIMALIA	ARTHROPODA	MALACOSTRACA	DECAPODA	EURYRHYNCHIDAE	Euryrhynchina edingtonae	I	EN
ANIMALIA	ARTHROPODA	MALACOSTRACA	DECAPODA	GECARCINUCIDAE	Austrothelphusa tigrina	I	VU
ANIMALIA	ARTHROPODA	MALACOSTRACA	DECAPODA	GECARCINUCIDAE	Ceylonthelphusa alpina	U	EN
ANIMALIA	ARTHROPODA	MALACOSTRACA	DECAPODA	GECARCINUCIDAE	Ceylonthelphusa armata	U	EN
ANIMALIA	ARTHROPODA	MALACOSTRACA	DECAPODA	GECARCINUCIDAE	Ceylonthelphusa callista	U	CR
ANIMALIA	ARTHROPODA	MALACOSTRACA	DECAPODA	GECARCINUCIDAE	Ceylonthelphusa cavatrix	U	EN
ANIMALIA	ARTHROPODA	MALACOSTRACA	DECAPODA	GECARCINUCIDAE	Ceylonthelphusa diva	U	EN
ANIMALIA	ARTHROPODA	MALACOSTRACA	DECAPODA	GECARCINUCIDAE	Ceylonthelphusa durrelli	U	CR
ANIMALIA	ARTHROPODA	MALACOSTRACA	DECAPODA	GECARCINUCIDAE	Ceylonthelphusa kandambyi	U	NT
ANIMALIA	ARTHROPODA	MALACOSTRACA	DECAPODA	GECARCINUCIDAE	Ceylonthelphusa kotagama	U	CR
ANIMALIA	ARTHROPODA	MALACOSTRACA	DECAPODA	GECARCINUCIDAE	Ceylonthelphusa nana	U	CR
ANIMALIA	ARTHROPODA	MALACOSTRACA	DECAPODA	GECARCINUCIDAE	Ceylonthelphusa nata	U	CR
ANIMALIA	ARTHROPODA	MALACOSTRACA	DECAPODA	GECARCINUCIDAE	Ceylonthelphusa orthos	U	CR
ANIMALIA	ARTHROPODA	MALACOSTRACA	DECAPODA	GECARCINUCIDAE	Ceylonthelphusa sanguinea	U	CR
ANIMALIA	ARTHROPODA	MALACOSTRACA	DECAPODA	GECARCINUCIDAE	Ceylonthelphusa savitriae	U	CR
ANIMALIA	ARTHROPODA	MALACOSTRACA	DECAPODA	GECARCINUCIDAE	Ceylonthelphusa venusta	U	NT
ANIMALIA	ARTHROPODA	MALACOSTRACA	DECAPODA	GECARCINUCIDAE	Clinothelphusa kakoota	U	CR
ANIMALIA	ARTHROPODA	MALACOSTRACA	DECAPODA	GECARCINUCIDAE	Heterothelphusa fatum	U	VU
ANIMALIA	ARTHROPODA	MALACOSTRACA	DECAPODA	GECARCINUCIDAE	Irmengardia johnsoni	U	VU
ANIMALIA	ARTHROPODA	MALACOSTRACA	DECAPODA	GECARCINUCIDAE	Lepidothelphusa cognetti	U	EN
ANIMALIA	ARTHROPODA	MALACOSTRACA	DECAPODA	GECARCINUCIDAE	Mahatha helaya	U	CR
ANIMALIA	ARTHROPODA	MALACOSTRACA	DECAPODA	GECARCINUCIDAE	Mahatha iora	U	CR
ANIMALIA	ARTHROPODA	MALACOSTRACA	DECAPODA	GECARCINUCIDAE	Mahatha lacuna	U	CR
ANIMALIA	ARTHROPODA	MALACOSTRACA	DECAPODA	GECARCINUCIDAE	Mahatha regina	U	CR
ANIMALIA	ARTHROPODA	MALACOSTRACA	DECAPODA	GECARCINUCIDAE	Mainitia mainitensis	U	VU
ANIMALIA	ARTHROPODA	MALACOSTRACA	DECAPODA	GECARCINUCIDAE	Nautilothelphusa zimmeri	L	EN
ANIMALIA	ARTHROPODA	MALACOSTRACA	DECAPODA	GECARCINUCIDAE	Oziothelphusa dakuna	U	EN
ANIMALIA	ARTHROPODA	MALACOSTRACA	DECAPODA	GECARCINUCIDAE	Oziothelphusa gallicola	U	EN
ANIMALIA	ARTHROPODA	MALACOSTRACA	DECAPODA	GECARCINUCIDAE	Oziothelphusa hippocastanum	U	VU
ANIMALIA	ARTHROPODA	MALACOSTRACA	DECAPODA	GECARCINUCIDAE	Oziothelphusa intuta	U	CR
ANIMALIA	ARTHROPODA	MALACOSTRACA	DECAPODA	GECARCINUCIDAE	Oziothelphusa kodagoda	U	CR
ANIMALIA	ARTHROPODA	MALACOSTRACA	DECAPODA	GECARCINUCIDAE	Oziothelphusa populosa	U	EN
ANIMALIA	ARTHROPODA	MALACOSTRACA	DECAPODA	GECARCINUCIDAE	Parathelphusa batamensis	U	EN
ANIMALIA	ARTHROPODA	MALACOSTRACA	DECAPODA	GECARCINUCIDAE	Parathelphusa crocea	U	VU
ANIMALIA	ARTHROPODA	MALACOSTRACA	DECAPODA	GECARCINUCIDAE	Parathelphusa ferruginea	L	EN
ANIMALIA	ARTHROPODA	MALACOSTRACA	DECAPODA	GECARCINUCIDAE	Parathelphusa pantherina	L	EN
ANIMALIA	ARTHROPODA	MALACOSTRACA	DECAPODA	GECARCINUCIDAE	Parathelphusa possoensis	U	VU
ANIMALIA	ARTHROPODA	MALACOSTRACA	DECAPODA	GECARCINUCIDAE	Pastilla dacuna	U	EN
ANIMALIA	ARTHROPODA	MALACOSTRACA	DECAPODA	GECARCINUCIDAE	Perbrinckia cracens	U	CR
ANIMALIA	ARTHROPODA	MALACOSTRACA	DECAPODA	GECARCINUCIDAE	Perbrinckia enodis	U	CR
ANIMALIA	ARTHROPODA	MALACOSTRACA	DECAPODA	GECARCINUCIDAE	Perbrinckia fido	U	CR
ANIMALIA	ARTHROPODA	MALACOSTRACA	DECAPODA	GECARCINUCIDAE	Perbrinckia morayensis	U	CR
ANIMALIA	ARTHROPODA	MALACOSTRACA	DECAPODA	GECARCINUCIDAE	Perbrinckia punctata	U	CR
ANIMALIA	ARTHROPODA	MALACOSTRACA	DECAPODA	GECARCINUCIDAE	Perbrinckia quadratus	U	CR
ANIMALIA	ARTHROPODA	MALACOSTRACA	DECAPODA	GECARCINUCIDAE	Perbrinckia rosae	U	CR
ANIMALIA	ARTHROPODA	MALACOSTRACA	DECAPODA	GECARCINUCIDAE	Phricotelphusa elegans	U	VU
ANIMALIA	ARTHROPODA	MALACOSTRACA	DECAPODA	GECARCINUCIDAE	Phricotelphusa limula	U	VU
ANIMALIA	ARTHROPODA	MALACOSTRACA	DECAPODA	GECARCINUCIDAE	Spiralothelphusa fernandoi	U	EN
ANIMALIA	ARTHROPODA	MALACOSTRACA	DECAPODA	GECARCINUCIDAE	Spiralothelphusa parvula	U	EN
ANIMALIA	ARTHROPODA	MALACOSTRACA	DECAPODA	GECARCINUCIDAE	Sundathelphusa sottoae	U	EN
ANIMALIA	ARTHROPODA	MALACOSTRACA	DECAPODA	GECARCINUCIDAE	Syntripsa flavichela	L	EN
ANIMALIA	ARTHROPODA	MALACOSTRACA	DECAPODA	GECARCINUCIDAE	Syntripsa matannensis	L	EN
ANIMALIA	ARTHROPODA	MALACOSTRACA	DECAPODA	GECARCINUCIDAE	Thaksinthelphusa yongchindaratae	U	EN
ANIMALIA	ARTHROPODA	MALACOSTRACA	DECAPODA	PALAEMONIDAE	Arachnochium kulsiense	L	EN
ANIMALIA	ARTHROPODA	MALACOSTRACA	DECAPODA	PALAEMONIDAE	Cryphiops brasiliensis	U	CR
ANIMALIA	ARTHROPODA	MALACOSTRACA	DECAPODA	PALAEMONIDAE	Leptopalaemon gibbosus	U	VU
ANIMALIA	ARTHROPODA	MALACOSTRACA	DECAPODA	PALAEMONIDAE	Leptopalaemon glabrus	U	CR
ANIMALIA	ARTHROPODA	MALACOSTRACA	DECAPODA	PALAEMONIDAE	Leptopalaemon gudjangah	U	VU
ANIMALIA	ARTHROPODA	MALACOSTRACA	DECAPODA	PALAEMONIDAE	Leptopalaemon magelensis	U	VU
ANIMALIA	ARTHROPODA	MALACOSTRACA	DECAPODA	PALAEMONIDAE	Macrobrachium elegantum	U	VU
ANIMALIA	ARTHROPODA	MALACOSTRACA	DECAPODA	PALAEMONIDAE	Macrobrachium hirtimanus	U	EN
ANIMALIA	ARTHROPODA	MALACOSTRACA	DECAPODA	PALAEMONIDAE	Macrobrachium lingyunense	U	VU
ANIMALIA	ARTHROPODA	MALACOSTRACA	DECAPODA	PALAEMONIDAE	Macrobrachium minutum	I	EN
ANIMALIA	ARTHROPODA	MALACOSTRACA	DECAPODA	PALAEMONIDAE	Macrobrachium naso	U	EN
ANIMALIA	ARTHROPODA	MALACOSTRACA	DECAPODA	PALAEMONIDAE	Macrobrachium poeti	U	EN
ANIMALIA	ARTHROPODA	MALACOSTRACA	DECAPODA	PALAEMONIDAE	Macrobrachium purpureamanus	I	CR
ANIMALIA	ARTHROPODA	MALACOSTRACA	DECAPODA	PALAEMONIDAE	Macrobrachium scorteccii	I	CR
ANIMALIA	ARTHROPODA	MALACOSTRACA	DECAPODA	PALAEMONIDAE	Palaemonetes cummingi	U	CR
ANIMALIA	ARTHROPODA	MALACOSTRACA	DECAPODA	PALAEMONIDAE	Palaemonetes mexicanus	U	CR
ANIMALIA	ARTHROPODA	MALACOSTRACA	DECAPODA	PALINURIDAE	Palinurus charlestoni	U	NT
ANIMALIA	ARTHROPODA	MALACOSTRACA	DECAPODA	PALINURIDAE	Palinurus elephas	L	VU
ANIMALIA	ARTHROPODA	MALACOSTRACA	DECAPODA	PARASTACIDAE	Astacoides betsileoensis	U	VU
ANIMALIA	ARTHROPODA	MALACOSTRACA	DECAPODA	PARASTACIDAE	Astacoides caldwelli	U	VU
ANIMALIA	ARTHROPODA	MALACOSTRACA	DECAPODA	PARASTACIDAE	Astacoides crosnieri	U	VU
ANIMALIA	ARTHROPODA	MALACOSTRACA	DECAPODA	PARASTACIDAE	Astacoides hobbsi	U	VU
ANIMALIA	ARTHROPODA	MALACOSTRACA	DECAPODA	PARASTACIDAE	Astacopsis gouldi	U	EN
ANIMALIA	ARTHROPODA	MALACOSTRACA	DECAPODA	PARASTACIDAE	Cherax leckii	I	CR
ANIMALIA	ARTHROPODA	MALACOSTRACA	DECAPODA	PARASTACIDAE	Cherax pallidus	U	EN
ANIMALIA	ARTHROPODA	MALACOSTRACA	DECAPODA	PARASTACIDAE	Cherax papuanus	U	VU
ANIMALIA	ARTHROPODA	MALACOSTRACA	DECAPODA	PARASTACIDAE	Cherax tenuimanus	U	CR
ANIMALIA	ARTHROPODA	MALACOSTRACA	DECAPODA	PARASTACIDAE	Engaeus granulatus	U	CR
ANIMALIA	ARTHROPODA	MALACOSTRACA	DECAPODA	PARASTACIDAE	Engaeus mallacoota	I	CR
ANIMALIA	ARTHROPODA	MALACOSTRACA	DECAPODA	PARASTACIDAE	Engaeus orramakunna	U	NT
ANIMALIA	ARTHROPODA	MALACOSTRACA	DECAPODA	PARASTACIDAE	Engaeus phyllocercus	U	EN
ANIMALIA	ARTHROPODA	MALACOSTRACA	DECAPODA	PARASTACIDAE	Engaeus rostrogaleatus	U	VU
ANIMALIA	ARTHROPODA	MALACOSTRACA	DECAPODA	PARASTACIDAE	Engaeus spinicaudatus	U	CR
ANIMALIA	ARTHROPODA	MALACOSTRACA	DECAPODA	PARASTACIDAE	Euastacus balanesis	I	EN
ANIMALIA	ARTHROPODA	MALACOSTRACA	DECAPODA	PARASTACIDAE	Euastacus bidawalis	U	EN
ANIMALIA	ARTHROPODA	MALACOSTRACA	DECAPODA	PARASTACIDAE	Euastacus bindal	U	CR
ANIMALIA	ARTHROPODA	MALACOSTRACA	DECAPODA	PARASTACIDAE	Euastacus bispinosus	U	VU
ANIMALIA	ARTHROPODA	MALACOSTRACA	DECAPODA	PARASTACIDAE	Euastacus brachythorax	I	EN
ANIMALIA	ARTHROPODA	MALACOSTRACA	DECAPODA	PARASTACIDAE	Euastacus clarkae	U	EN
ANIMALIA	ARTHROPODA	MALACOSTRACA	DECAPODA	PARASTACIDAE	Euastacus claytoni	I	EN
ANIMALIA	ARTHROPODA	MALACOSTRACA	DECAPODA	PARASTACIDAE	Euastacus crassus	U	EN
ANIMALIA	ARTHROPODA	MALACOSTRACA	DECAPODA	PARASTACIDAE	Euastacus dalagarbe	U	CR
ANIMALIA	ARTHROPODA	MALACOSTRACA	DECAPODA	PARASTACIDAE	Euastacus dharawalus	U	CR
ANIMALIA	ARTHROPODA	MALACOSTRACA	DECAPODA	PARASTACIDAE	Euastacus diversus	U	EN
ANIMALIA	ARTHROPODA	MALACOSTRACA	DECAPODA	PARASTACIDAE	Euastacus eungella	I	CR
ANIMALIA	ARTHROPODA	MALACOSTRACA	DECAPODA	PARASTACIDAE	Euastacus fleckeri	I	EN
ANIMALIA	ARTHROPODA	MALACOSTRACA	DECAPODA	PARASTACIDAE	Euastacus gamilaroi	I	CR
ANIMALIA	ARTHROPODA	MALACOSTRACA	DECAPODA	PARASTACIDAE	Euastacus girurmulayn	U	CR
ANIMALIA	ARTHROPODA	MALACOSTRACA	DECAPODA	PARASTACIDAE	Euastacus gumar	I	EN
ANIMALIA	ARTHROPODA	MALACOSTRACA	DECAPODA	PARASTACIDAE	Euastacus guruhgi	U	CR
ANIMALIA	ARTHROPODA	MALACOSTRACA	DECAPODA	PARASTACIDAE	Euastacus guwinus	I	CR
ANIMALIA	ARTHROPODA	MALACOSTRACA	DECAPODA	PARASTACIDAE	Euastacus hirsutus	I	EN
ANIMALIA	ARTHROPODA	MALACOSTRACA	DECAPODA	PARASTACIDAE	Euastacus hystricosus	U	EN
ANIMALIA	ARTHROPODA	MALACOSTRACA	DECAPODA	PARASTACIDAE	Euastacus jagabar	U	CR
ANIMALIA	ARTHROPODA	MALACOSTRACA	DECAPODA	PARASTACIDAE	Euastacus jagara	I	CR
ANIMALIA	ARTHROPODA	MALACOSTRACA	DECAPODA	PARASTACIDAE	Euastacus maccai	I	EN
ANIMALIA	ARTHROPODA	MALACOSTRACA	DECAPODA	PARASTACIDAE	Euastacus maidae	I	CR
ANIMALIA	ARTHROPODA	MALACOSTRACA	DECAPODA	PARASTACIDAE	Euastacus mirangudjin	I	CR
ANIMALIA	ARTHROPODA	MALACOSTRACA	DECAPODA	PARASTACIDAE	Euastacus monteithorum	I	CR
ANIMALIA	ARTHROPODA	MALACOSTRACA	DECAPODA	PARASTACIDAE	Euastacus neodiversus	I	EN
ANIMALIA	ARTHROPODA	MALACOSTRACA	DECAPODA	PARASTACIDAE	Euastacus pilosus	I	EN
ANIMALIA	ARTHROPODA	MALACOSTRACA	DECAPODA	PARASTACIDAE	Euastacus polysetosus	I	EN
ANIMALIA	ARTHROPODA	MALACOSTRACA	DECAPODA	PARASTACIDAE	Euastacus robertsi	I	CR
ANIMALIA	ARTHROPODA	MALACOSTRACA	DECAPODA	PARASTACIDAE	Euastacus setosus	I	CR
ANIMALIA	ARTHROPODA	MALACOSTRACA	DECAPODA	PARASTACIDAE	Euastacus simplex	I	VU
ANIMALIA	ARTHROPODA	MALACOSTRACA	DECAPODA	PARASTACIDAE	Euastacus spinichelatus	I	EN
ANIMALIA	ARTHROPODA	MALACOSTRACA	DECAPODA	PARASTACIDAE	Euastacus sulcatus	I	VU
ANIMALIA	ARTHROPODA	MALACOSTRACA	DECAPODA	PARASTACIDAE	Euastacus suttoni	U	VU
ANIMALIA	ARTHROPODA	MALACOSTRACA	DECAPODA	PARASTACIDAE	Euastacus urospinosus	I	EN
ANIMALIA	ARTHROPODA	MALACOSTRACA	DECAPODA	PARASTACIDAE	Euastacus wiowuru	I	NT
ANIMALIA	ARTHROPODA	MALACOSTRACA	DECAPODA	PARASTACIDAE	Euastacus yarreansis	I	VU
ANIMALIA	ARTHROPODA	MALACOSTRACA	DECAPODA	PARASTACIDAE	Euastacus yigara	I	CR
ANIMALIA	ARTHROPODA	MALACOSTRACA	DECAPODA	PARASTACIDAE	Ombrastacoides asperrimanus	I	NT
ANIMALIA	ARTHROPODA	MALACOSTRACA	DECAPODA	PARASTACIDAE	Ombrastacoides denisoni	I	CR
ANIMALIA	ARTHROPODA	MALACOSTRACA	DECAPODA	PARASTACIDAE	Ombrastacoides dissitus	U	NT
ANIMALIA	ARTHROPODA	MALACOSTRACA	DECAPODA	PARASTACIDAE	Ombrastacoides pulcher	U	VU
ANIMALIA	ARTHROPODA	MALACOSTRACA	DECAPODA	POTAMIDAE	Cryptopotamon anacoluthon	U	VU
ANIMALIA	ARTHROPODA	MALACOSTRACA	DECAPODA	POTAMIDAE	Doimon doichiangdao	U	EN
ANIMALIA	ARTHROPODA	MALACOSTRACA	DECAPODA	POTAMIDAE	Doimon doisutep	U	EN
ANIMALIA	ARTHROPODA	MALACOSTRACA	DECAPODA	POTAMIDAE	Indochinamon cua	U	VU
ANIMALIA	ARTHROPODA	MALACOSTRACA	DECAPODA	POTAMIDAE	Indochinamon dangi	I	VU
ANIMALIA	ARTHROPODA	MALACOSTRACA	DECAPODA	POTAMIDAE	Indochinamon villosum	I	EN
ANIMALIA	ARTHROPODA	MALACOSTRACA	DECAPODA	POTAMIDAE	Johora counsilmani	U	VU
ANIMALIA	ARTHROPODA	MALACOSTRACA	DECAPODA	POTAMIDAE	Johora punicea	U	EN
ANIMALIA	ARTHROPODA	MALACOSTRACA	DECAPODA	POTAMIDAE	Johora singaporensis	U	CR
ANIMALIA	ARTHROPODA	MALACOSTRACA	DECAPODA	POTAMIDAE	Johora tiomanensis	U	NT
ANIMALIA	ARTHROPODA	MALACOSTRACA	DECAPODA	POTAMIDAE	Nemoron nomas	U	VU
ANIMALIA	ARTHROPODA	MALACOSTRACA	DECAPODA	POTAMIDAE	Parapotamon spinescens	U	VU
ANIMALIA	ARTHROPODA	MALACOSTRACA	DECAPODA	POTAMIDAE	Pilosamon guinotae	I	NT
ANIMALIA	ARTHROPODA	MALACOSTRACA	DECAPODA	POTAMIDAE	Potamon bileki	U	VU
ANIMALIA	ARTHROPODA	MALACOSTRACA	DECAPODA	POTAMIDAE	Potamon fluviatile	U	NT
ANIMALIA	ARTHROPODA	MALACOSTRACA	DECAPODA	POTAMIDAE	Potamon ibericum	U	NT
ANIMALIA	ARTHROPODA	MALACOSTRACA	DECAPODA	POTAMIDAE	Potamon potamios	U	NT
ANIMALIA	ARTHROPODA	MALACOSTRACA	DECAPODA	POTAMIDAE	Potamon rhodium	U	NT
ANIMALIA	ARTHROPODA	MALACOSTRACA	DECAPODA	POTAMIDAE	Sinopotamon hanyangense	U	VU
ANIMALIA	ARTHROPODA	MALACOSTRACA	DECAPODA	POTAMONAUTIDAE	Afrithelphusa monodosa	U	EN
ANIMALIA	ARTHROPODA	MALACOSTRACA	DECAPODA	POTAMONAUTIDAE	Deckenia imitatrix	U	NT
ANIMALIA	ARTHROPODA	MALACOSTRACA	DECAPODA	POTAMONAUTIDAE	Deckenia mitis	U	NT
ANIMALIA	ARTHROPODA	MALACOSTRACA	DECAPODA	POTAMONAUTIDAE	Globonautes macropus	U	EN
ANIMALIA	ARTHROPODA	MALACOSTRACA	DECAPODA	POTAMONAUTIDAE	Liberonautes grandbassa	U	CR
ANIMALIA	ARTHROPODA	MALACOSTRACA	DECAPODA	POTAMONAUTIDAE	Liberonautes lugbe	U	CR
ANIMALIA	ARTHROPODA	MALACOSTRACA	DECAPODA	POTAMONAUTIDAE	Liberonautes nanoides	U	EN
ANIMALIA	ARTHROPODA	MALACOSTRACA	DECAPODA	POTAMONAUTIDAE	Liberonautes nimba	U	VU
ANIMALIA	ARTHROPODA	MALACOSTRACA	DECAPODA	POTAMONAUTIDAE	Liberonautes rubigimanus	U	EN
ANIMALIA	ARTHROPODA	MALACOSTRACA	DECAPODA	POTAMONAUTIDAE	Louisea balssi	U	EN
ANIMALIA	ARTHROPODA	MALACOSTRACA	DECAPODA	POTAMONAUTIDAE	Louisea edeaensis	U	EN
ANIMALIA	ARTHROPODA	MALACOSTRACA	DECAPODA	POTAMONAUTIDAE	Potamonautes gonocristatus	U	EN
ANIMALIA	ARTHROPODA	MALACOSTRACA	DECAPODA	POTAMONAUTIDAE	Potamonautes idjiwiensis	U	EN
ANIMALIA	ARTHROPODA	MALACOSTRACA	DECAPODA	POTAMONAUTIDAE	Potamonautes ignestii	U	VU
ANIMALIA	ARTHROPODA	MALACOSTRACA	DECAPODA	POTAMONAUTIDAE	Potamonautes infravallatus	U	VU
ANIMALIA	ARTHROPODA	MALACOSTRACA	DECAPODA	POTAMONAUTIDAE	Potamonautes lividus	I	VU
ANIMALIA	ARTHROPODA	MALACOSTRACA	DECAPODA	POTAMONAUTIDAE	Potamonautes pilosus	I	VU
ANIMALIA	ARTHROPODA	MALACOSTRACA	DECAPODA	POTAMONAUTIDAE	Potamonautes platycentron	I	EN
ANIMALIA	ARTHROPODA	MALACOSTRACA	DECAPODA	POTAMONAUTIDAE	Potamonautes raybouldi	U	VU
ANIMALIA	ARTHROPODA	MALACOSTRACA	DECAPODA	POTAMONAUTIDAE	Potamonautes reidi	U	VU
ANIMALIA	ARTHROPODA	MALACOSTRACA	DECAPODA	POTAMONAUTIDAE	Potamonautes subukia	I	VU
ANIMALIA	ARTHROPODA	MALACOSTRACA	DECAPODA	POTAMONAUTIDAE	Potamonautes triangulus	I	VU
ANIMALIA	ARTHROPODA	MALACOSTRACA	DECAPODA	POTAMONAUTIDAE	Potamonautes unisulcatus	U	VU
ANIMALIA	ARTHROPODA	MALACOSTRACA	DECAPODA	POTAMONAUTIDAE	Potamonautes xiphoidus	U	VU
ANIMALIA	ARTHROPODA	MALACOSTRACA	DECAPODA	POTAMONAUTIDAE	Potamonemus sachsi	U	VU
ANIMALIA	ARTHROPODA	MALACOSTRACA	DECAPODA	PSEUDOTHELPHUSIDAE	Epilobocera wetherbeei	U	VU
ANIMALIA	ARTHROPODA	MALACOSTRACA	DECAPODA	PSEUDOTHELPHUSIDAE	Potamocarcinus hartmanni	U	VU
ANIMALIA	ARTHROPODA	MALACOSTRACA	DECAPODA	PSEUDOTHELPHUSIDAE	Rodriguezus trujillensis	U	VU
ANIMALIA	ARTHROPODA	MALACOSTRACA	DECAPODA	PSEUDOTHELPHUSIDAE	Strengeriana antioquensis	U	CR
ANIMALIA	ARTHROPODA	MALACOSTRACA	DECAPODA	PSEUDOTHELPHUSIDAE	Tehuana lamothei	U	EN
ANIMALIA	ARTHROPODA	MALACOSTRACA	DECAPODA	PSEUDOTHELPHUSIDAE	Tehuana poglayenorum	U	EN
ANIMALIA	ARTHROPODA	MALACOSTRACA	DECAPODA	PSEUDOTHELPHUSIDAE	Tehuana veracruzana	U	CR
ANIMALIA	ARTHROPODA	MALACOSTRACA	DECAPODA	PSEUDOTHELPHUSIDAE	Typhlopseudothelphusa mocinoi	U	EN
ANIMALIA	ARTHROPODA	MALACOSTRACA	DECAPODA	SESARMIDAE	Karstama balicum	U	CR
ANIMALIA	ARTHROPODA	MALACOSTRACA	DECAPODA	TRICHODACTYLIDAE	Trichodactylus crassus	U	EN
ANIMALIA	ARTHROPODA	MALACOSTRACA	ISOPODA	ARMADILLIDAE	Pseudolaureola atlantica	U	CR
ANIMALIA	ARTHROPODA	MALACOSTRACA	MICTACEA	MICTOCARIDIDAE	Mictocaris halope	U	CR
ANIMALIA	ARTHROPODA	MEROSTOMATA	XIPHOSURA	LIMULIDAE	Limulus polyphemus	L	VU
ANIMALIA	ARTHROPODA	MEROSTOMATA	XIPHOSURA	LIMULIDAE	Tachypleus tridentatus	I	EN
ANIMALIA	CHORDATA	ACTINOPTERYGII	ACIPENSERIFORMES	ACIPENSERIDAE	Acipenser baerii	L	EN
ANIMALIA	CHORDATA	ACTINOPTERYGII	ACIPENSERIFORMES	ACIPENSERIDAE	Acipenser brevirostrum	U	VU
ANIMALIA	CHORDATA	ACTINOPTERYGII	ACIPENSERIFORMES	ACIPENSERIDAE	Acipenser dabryanus	L	CR
ANIMALIA	CHORDATA	ACTINOPTERYGII	ACIPENSERIFORMES	ACIPENSERIDAE	Acipenser gueldenstaedtii	L	CR
ANIMALIA	CHORDATA	ACTINOPTERYGII	ACIPENSERIFORMES	ACIPENSERIDAE	Acipenser medirostris	I	NT
ANIMALIA	CHORDATA	ACTINOPTERYGII	ACIPENSERIFORMES	ACIPENSERIDAE	Acipenser mikadoi	L	CR
ANIMALIA	CHORDATA	ACTINOPTERYGII	ACIPENSERIFORMES	ACIPENSERIDAE	Acipenser naccarii	U	CR
ANIMALIA	CHORDATA	ACTINOPTERYGII	ACIPENSERIFORMES	ACIPENSERIDAE	Acipenser nudiventris	L	CR
ANIMALIA	CHORDATA	ACTINOPTERYGII	ACIPENSERIFORMES	ACIPENSERIDAE	Acipenser oxyrinchus	I	NT
ANIMALIA	CHORDATA	ACTINOPTERYGII	ACIPENSERIFORMES	ACIPENSERIDAE	Acipenser persicus	L	CR
ANIMALIA	CHORDATA	ACTINOPTERYGII	ACIPENSERIFORMES	ACIPENSERIDAE	Acipenser ruthenus	L	VU
ANIMALIA	CHORDATA	ACTINOPTERYGII	ACIPENSERIFORMES	ACIPENSERIDAE	Acipenser schrenckii	L	CR
ANIMALIA	CHORDATA	ACTINOPTERYGII	ACIPENSERIFORMES	ACIPENSERIDAE	Acipenser sinensis	L	CR
ANIMALIA	CHORDATA	ACTINOPTERYGII	ACIPENSERIFORMES	ACIPENSERIDAE	Acipenser stellatus	L	CR
ANIMALIA	CHORDATA	ACTINOPTERYGII	ACIPENSERIFORMES	ACIPENSERIDAE	Acipenser sturio	I	CR
ANIMALIA	CHORDATA	ACTINOPTERYGII	ACIPENSERIFORMES	ACIPENSERIDAE	Huso dauricus	L	CR
ANIMALIA	CHORDATA	ACTINOPTERYGII	ACIPENSERIFORMES	ACIPENSERIDAE	Huso huso	L	CR
ANIMALIA	CHORDATA	ACTINOPTERYGII	ACIPENSERIFORMES	ACIPENSERIDAE	Pseudoscaphirhynchus hermanni	U	CR
ANIMALIA	CHORDATA	ACTINOPTERYGII	ACIPENSERIFORMES	ACIPENSERIDAE	Pseudoscaphirhynchus kaufmanni	U	CR
ANIMALIA	CHORDATA	ACTINOPTERYGII	ACIPENSERIFORMES	ACIPENSERIDAE	Scaphirhynchus albus	U	EN
ANIMALIA	CHORDATA	ACTINOPTERYGII	ACIPENSERIFORMES	ACIPENSERIDAE	Scaphirhynchus platorynchus	I	VU
ANIMALIA	CHORDATA	ACTINOPTERYGII	ACIPENSERIFORMES	ACIPENSERIDAE	Scaphirhynchus suttkusi	U	CR
ANIMALIA	CHORDATA	ACTINOPTERYGII	ACIPENSERIFORMES	POLYODONTIDAE	Polyodon spathula	I	VU
ANIMALIA	CHORDATA	ACTINOPTERYGII	ACIPENSERIFORMES	POLYODONTIDAE	Psephurus gladius	U	CR
ANIMALIA	CHORDATA	ACTINOPTERYGII	ALBULIFORMES	ALBULIDAE	Albula glossodonta	U	VU
ANIMALIA	CHORDATA	ACTINOPTERYGII	ALBULIFORMES	ALBULIDAE	Albula vulpes	U	NT
ANIMALIA	CHORDATA	ACTINOPTERYGII	ANGUILLIFORMES	ANGUILLIDAE	Anguilla anguilla	L	CR
ANIMALIA	CHORDATA	ACTINOPTERYGII	ANGUILLIFORMES	ANGUILLIDAE	Anguilla australis	L	NT
ANIMALIA	CHORDATA	ACTINOPTERYGII	ANGUILLIFORMES	ANGUILLIDAE	Anguilla bengalensis	L	NT
ANIMALIA	CHORDATA	ACTINOPTERYGII	ANGUILLIFORMES	ANGUILLIDAE	Anguilla bicolor	L	NT
ANIMALIA	CHORDATA	ACTINOPTERYGII	ANGUILLIFORMES	ANGUILLIDAE	Anguilla borneensis	I	VU
ANIMALIA	CHORDATA	ACTINOPTERYGII	ANGUILLIFORMES	ANGUILLIDAE	Anguilla dieffenbachii	L	EN
ANIMALIA	CHORDATA	ACTINOPTERYGII	ANGUILLIFORMES	ANGUILLIDAE	Anguilla japonica	L	EN
ANIMALIA	CHORDATA	ACTINOPTERYGII	ANGUILLIFORMES	ANGUILLIDAE	Anguilla luzonensis	L	VU
ANIMALIA	CHORDATA	ACTINOPTERYGII	ANGUILLIFORMES	ANGUILLIDAE	Anguilla mossambica	L	NT
ANIMALIA	CHORDATA	ACTINOPTERYGII	ANGUILLIFORMES	ANGUILLIDAE	Anguilla rostrata	L	EN
ANIMALIA	CHORDATA	ACTINOPTERYGII	ANGUILLIFORMES	OPHICHTHIDAE	Pisodonophis daspilotus	U	NT
ANIMALIA	CHORDATA	ACTINOPTERYGII	ATHERINIFORMES	ATHERINIDAE	Craterocephalus dalhousiensis	U	CR
ANIMALIA	CHORDATA	ACTINOPTERYGII	ATHERINIFORMES	ATHERINIDAE	Craterocephalus fluviatilis	U	CR
ANIMALIA	CHORDATA	ACTINOPTERYGII	ATHERINIFORMES	ATHERINIDAE	Craterocephalus helenae	U	NT
ANIMALIA	CHORDATA	ACTINOPTERYGII	ATHERINIFORMES	ATHERINIDAE	Paratherina cyanea	U	NT
ANIMALIA	CHORDATA	ACTINOPTERYGII	ATHERINIFORMES	ATHERINIDAE	Paratherina labiosa	U	CR
ANIMALIA	CHORDATA	ACTINOPTERYGII	ATHERINIFORMES	ATHERINIDAE	Paratherina striata	U	NT
ANIMALIA	CHORDATA	ACTINOPTERYGII	ATHERINIFORMES	ATHERINIDAE	Paratherina wolterecki	U	NT
ANIMALIA	CHORDATA	ACTINOPTERYGII	ATHERINIFORMES	ATHERINIDAE	Poblana squamata	U	CR
ANIMALIA	CHORDATA	ACTINOPTERYGII	ATHERINIFORMES	ATHERINIDAE	Teramulus waterloti	U	EN
ANIMALIA	CHORDATA	ACTINOPTERYGII	ATHERINIFORMES	ATHERINIDAE	Tominanga aurea	U	NT
ANIMALIA	CHORDATA	ACTINOPTERYGII	ATHERINIFORMES	ATHERINIDAE	Tominanga sanguicauda	U	NT
ANIMALIA	CHORDATA	ACTINOPTERYGII	ATHERINIFORMES	ATHERINOPSIDAE	Atherinella ammophila	I	EN
ANIMALIA	CHORDATA	ACTINOPTERYGII	ATHERINIFORMES	ATHERINOPSIDAE	Atherinella lisa	I	EN
ANIMALIA	CHORDATA	ACTINOPTERYGII	ATHERINIFORMES	ATHERINOPSIDAE	Chirostoma aculeatum	I	CR
ANIMALIA	CHORDATA	ACTINOPTERYGII	ATHERINIFORMES	ATHERINOPSIDAE	Chirostoma attenuatum	U	EN
ANIMALIA	CHORDATA	ACTINOPTERYGII	ATHERINIFORMES	ATHERINOPSIDAE	Chirostoma bartoni	U	CR
ANIMALIA	CHORDATA	ACTINOPTERYGII	ATHERINIFORMES	ATHERINOPSIDAE	Chirostoma chapalae	U	VU
ANIMALIA	CHORDATA	ACTINOPTERYGII	ATHERINIFORMES	ATHERINOPSIDAE	Chirostoma charari	I	CR
ANIMALIA	CHORDATA	ACTINOPTERYGII	ATHERINIFORMES	ATHERINOPSIDAE	Chirostoma estor	U	EN
ANIMALIA	CHORDATA	ACTINOPTERYGII	ATHERINIFORMES	ATHERINOPSIDAE	Chirostoma humboldtianum	U	VU
ANIMALIA	CHORDATA	ACTINOPTERYGII	ATHERINIFORMES	ATHERINOPSIDAE	Chirostoma lucius	L	EN
ANIMALIA	CHORDATA	ACTINOPTERYGII	ATHERINIFORMES	ATHERINOPSIDAE	Chirostoma mezquital	I	EN
ANIMALIA	CHORDATA	ACTINOPTERYGII	ATHERINIFORMES	ATHERINOPSIDAE	Chirostoma patzcuaro	I	CR
ANIMALIA	CHORDATA	ACTINOPTERYGII	ATHERINIFORMES	ATHERINOPSIDAE	Chirostoma promelas	U	EN
ANIMALIA	CHORDATA	ACTINOPTERYGII	ATHERINIFORMES	ATHERINOPSIDAE	Chirostoma riojai	U	CR
ANIMALIA	CHORDATA	ACTINOPTERYGII	ATHERINIFORMES	ATHERINOPSIDAE	Chirostoma sphyraena	L	EN
ANIMALIA	CHORDATA	ACTINOPTERYGII	ATHERINIFORMES	ATHERINOPSIDAE	Colpichthys regis	I	NT
ANIMALIA	CHORDATA	ACTINOPTERYGII	ATHERINIFORMES	ATHERINOPSIDAE	Leuresthes sardina	I	NT
ANIMALIA	CHORDATA	ACTINOPTERYGII	ATHERINIFORMES	BEDOTIIDAE	Bedotia albomarginata	I	EN
ANIMALIA	CHORDATA	ACTINOPTERYGII	ATHERINIFORMES	BEDOTIIDAE	Bedotia alveyi	I	NT
ANIMALIA	CHORDATA	ACTINOPTERYGII	ATHERINIFORMES	BEDOTIIDAE	Bedotia geayi	I	EN
ANIMALIA	CHORDATA	ACTINOPTERYGII	ATHERINIFORMES	BEDOTIIDAE	Bedotia leucopteron	U	EN
ANIMALIA	CHORDATA	ACTINOPTERYGII	ATHERINIFORMES	BEDOTIIDAE	Bedotia longianalis	U	EN
ANIMALIA	CHORDATA	ACTINOPTERYGII	ATHERINIFORMES	BEDOTIIDAE	Bedotia madagascariensis	U	EN
ANIMALIA	CHORDATA	ACTINOPTERYGII	ATHERINIFORMES	BEDOTIIDAE	Bedotia marojejy	U	EN
ANIMALIA	CHORDATA	ACTINOPTERYGII	ATHERINIFORMES	BEDOTIIDAE	Bedotia masoala	U	VU
ANIMALIA	CHORDATA	ACTINOPTERYGII	ATHERINIFORMES	BEDOTIIDAE	Bedotia sp. nov. 'Ankavia-Ankavanana'	U	VU
ANIMALIA	CHORDATA	ACTINOPTERYGII	ATHERINIFORMES	BEDOTIIDAE	Bedotia sp. nov. 'Bemarivo'	U	VU
ANIMALIA	CHORDATA	ACTINOPTERYGII	ATHERINIFORMES	BEDOTIIDAE	Bedotia sp. nov. 'Betampona'	U	VU
ANIMALIA	CHORDATA	ACTINOPTERYGII	ATHERINIFORMES	BEDOTIIDAE	Bedotia sp. nov. 'Lazana'	U	VU
ANIMALIA	CHORDATA	ACTINOPTERYGII	ATHERINIFORMES	BEDOTIIDAE	Bedotia sp. nov. 'Mahanara'	U	VU
ANIMALIA	CHORDATA	ACTINOPTERYGII	ATHERINIFORMES	BEDOTIIDAE	Bedotia sp. nov. 'Manombo'	U	CR
ANIMALIA	CHORDATA	ACTINOPTERYGII	ATHERINIFORMES	BEDOTIIDAE	Bedotia sp. nov. 'Namorona'	U	VU
ANIMALIA	CHORDATA	ACTINOPTERYGII	ATHERINIFORMES	BEDOTIIDAE	Bedotia sp. nov. 'Nosivola'	U	VU
ANIMALIA	CHORDATA	ACTINOPTERYGII	ATHERINIFORMES	BEDOTIIDAE	Bedotia sp. nov. 'Sambava'	U	CR
ANIMALIA	CHORDATA	ACTINOPTERYGII	ATHERINIFORMES	BEDOTIIDAE	Bedotia sp. nov. 'Vevembe'	U	CR
ANIMALIA	CHORDATA	ACTINOPTERYGII	ATHERINIFORMES	BEDOTIIDAE	Bedotia tricolor	I	CR
ANIMALIA	CHORDATA	ACTINOPTERYGII	ATHERINIFORMES	BEDOTIIDAE	Rheocles alaotrensis	I	EN
ANIMALIA	CHORDATA	ACTINOPTERYGII	ATHERINIFORMES	BEDOTIIDAE	Rheocles derhami	U	CR
ANIMALIA	CHORDATA	ACTINOPTERYGII	ATHERINIFORMES	BEDOTIIDAE	Rheocles lateralis	I	CR
ANIMALIA	CHORDATA	ACTINOPTERYGII	ATHERINIFORMES	BEDOTIIDAE	Rheocles vatosoa	U	EN
ANIMALIA	CHORDATA	ACTINOPTERYGII	ATHERINIFORMES	BEDOTIIDAE	Rheocles wrightae	I	EN
ANIMALIA	CHORDATA	ACTINOPTERYGII	ATHERINIFORMES	MELANOTAENIIDAE	Cairnsichthys bitaeniatus	I	CR
ANIMALIA	CHORDATA	ACTINOPTERYGII	ATHERINIFORMES	MELANOTAENIIDAE	Cairnsichthys rhombosomoides	I	EN
ANIMALIA	CHORDATA	ACTINOPTERYGII	ATHERINIFORMES	MELANOTAENIIDAE	Chilatherina bleheri	I	VU
ANIMALIA	CHORDATA	ACTINOPTERYGII	ATHERINIFORMES	MELANOTAENIIDAE	Melanotaenia boesemani	L	EN
ANIMALIA	CHORDATA	ACTINOPTERYGII	ATHERINIFORMES	MELANOTAENIIDAE	Melanotaenia eachamensis	I	EN
ANIMALIA	CHORDATA	ACTINOPTERYGII	ATHERINIFORMES	MELANOTAENIIDAE	Melanotaenia gracilis	I	EN
ANIMALIA	CHORDATA	ACTINOPTERYGII	ATHERINIFORMES	MELANOTAENIIDAE	Melanotaenia pygmaea	I	VU
ANIMALIA	CHORDATA	ACTINOPTERYGII	ATHERINIFORMES	MELANOTAENIIDAE	Melanotaenia sp. nov. 'Darwin'	I	VU
ANIMALIA	CHORDATA	ACTINOPTERYGII	ATHERINIFORMES	MELANOTAENIIDAE	Melanotaenia sp. nov. 'Malanda'	I	CR
ANIMALIA	CHORDATA	ACTINOPTERYGII	ATHERINIFORMES	MELANOTAENIIDAE	Melanotaenia sp. nov. 'Running River'	U	CR
ANIMALIA	CHORDATA	ACTINOPTERYGII	ATHERINIFORMES	MELANOTAENIIDAE	Melanotaenia utcheensis	I	EN
ANIMALIA	CHORDATA	ACTINOPTERYGII	ATHERINIFORMES	PHALLOSTETHIDAE	Neostethus thessa	U	EN
ANIMALIA	CHORDATA	ACTINOPTERYGII	ATHERINIFORMES	PSEUDOMUGILIDAE	Kiunga ballochi	U	CR
ANIMALIA	CHORDATA	ACTINOPTERYGII	ATHERINIFORMES	PSEUDOMUGILIDAE	Pseudomugil connieae	I	VU
ANIMALIA	CHORDATA	ACTINOPTERYGII	ATHERINIFORMES	PSEUDOMUGILIDAE	Pseudomugil mellis	I	EN
ANIMALIA	CHORDATA	ACTINOPTERYGII	ATHERINIFORMES	PSEUDOMUGILIDAE	Scaturiginichthys vermeilipinnis	I	CR
ANIMALIA	CHORDATA	ACTINOPTERYGII	ATHERINIFORMES	TELMATHERINIDAE	Marosatherina ladigesi	L	VU
ANIMALIA	CHORDATA	ACTINOPTERYGII	ATHERINIFORMES	TELMATHERINIDAE	Telmatherina abendanoni	U	NT
ANIMALIA	CHORDATA	ACTINOPTERYGII	ATHERINIFORMES	TELMATHERINIDAE	Telmatherina antoniae	U	NT
ANIMALIA	CHORDATA	ACTINOPTERYGII	ATHERINIFORMES	TELMATHERINIDAE	Telmatherina bonti	U	EN
ANIMALIA	CHORDATA	ACTINOPTERYGII	ATHERINIFORMES	TELMATHERINIDAE	Telmatherina celebensis	U	NT
ANIMALIA	CHORDATA	ACTINOPTERYGII	ATHERINIFORMES	TELMATHERINIDAE	Telmatherina obscura	U	NT
ANIMALIA	CHORDATA	ACTINOPTERYGII	ATHERINIFORMES	TELMATHERINIDAE	Telmatherina opudi	U	NT
ANIMALIA	CHORDATA	ACTINOPTERYGII	ATHERINIFORMES	TELMATHERINIDAE	Telmatherina prognatha	U	NT
ANIMALIA	CHORDATA	ACTINOPTERYGII	ATHERINIFORMES	TELMATHERINIDAE	Telmatherina sarasinorum	U	NT
ANIMALIA	CHORDATA	ACTINOPTERYGII	ATHERINIFORMES	TELMATHERINIDAE	Telmatherina wahjui	U	EN
ANIMALIA	CHORDATA	ACTINOPTERYGII	AULOPIFORMES	SYNODONTIDAE	Harpadon nehereus	L	NT
ANIMALIA	CHORDATA	ACTINOPTERYGII	BATRACHOIDIFORMES	BATRACHOIDIDAE	Sanopus astrifer	U	VU
ANIMALIA	CHORDATA	ACTINOPTERYGII	BATRACHOIDIFORMES	BATRACHOIDIDAE	Sanopus reticulatus	U	EN
ANIMALIA	CHORDATA	ACTINOPTERYGII	BATRACHOIDIFORMES	BATRACHOIDIDAE	Sanopus splendidus	U	EN
ANIMALIA	CHORDATA	ACTINOPTERYGII	BATRACHOIDIFORMES	BATRACHOIDIDAE	Thalassophryne uranoscopus	U	VU
ANIMALIA	CHORDATA	ACTINOPTERYGII	BELONIFORMES	ADRIANICHTHYIDAE	Adrianichthys kruyti	U	CR
ANIMALIA	CHORDATA	ACTINOPTERYGII	BELONIFORMES	ADRIANICHTHYIDAE	Adrianichthys roseni	U	CR
ANIMALIA	CHORDATA	ACTINOPTERYGII	BELONIFORMES	ADRIANICHTHYIDAE	Oryzias asinua	I	EN
ANIMALIA	CHORDATA	ACTINOPTERYGII	BELONIFORMES	ADRIANICHTHYIDAE	Oryzias eversi	I	NT
ANIMALIA	CHORDATA	ACTINOPTERYGII	BELONIFORMES	ADRIANICHTHYIDAE	Oryzias hadiatyae	I	VU
ANIMALIA	CHORDATA	ACTINOPTERYGII	BELONIFORMES	ADRIANICHTHYIDAE	Oryzias hubbsi	I	NT
ANIMALIA	CHORDATA	ACTINOPTERYGII	BELONIFORMES	ADRIANICHTHYIDAE	Oryzias marmoratus	I	NT
ANIMALIA	CHORDATA	ACTINOPTERYGII	BELONIFORMES	ADRIANICHTHYIDAE	Oryzias matanensis	U	NT
ANIMALIA	CHORDATA	ACTINOPTERYGII	BELONIFORMES	ADRIANICHTHYIDAE	Oryzias nebulosus	I	NT
ANIMALIA	CHORDATA	ACTINOPTERYGII	BELONIFORMES	ADRIANICHTHYIDAE	Oryzias nigrimas	I	NT
ANIMALIA	CHORDATA	ACTINOPTERYGII	BELONIFORMES	ADRIANICHTHYIDAE	Oryzias orthognathus	I	NT
ANIMALIA	CHORDATA	ACTINOPTERYGII	BELONIFORMES	ADRIANICHTHYIDAE	Oryzias profundicola	U	NT
ANIMALIA	CHORDATA	ACTINOPTERYGII	BELONIFORMES	ADRIANICHTHYIDAE	Oryzias soerotoi	I	CR
ANIMALIA	CHORDATA	ACTINOPTERYGII	BELONIFORMES	ADRIANICHTHYIDAE	Oryzias timorensis	I	CR
ANIMALIA	CHORDATA	ACTINOPTERYGII	BELONIFORMES	ADRIANICHTHYIDAE	Oryzias woworae	L	EN
ANIMALIA	CHORDATA	ACTINOPTERYGII	BELONIFORMES	ADRIANICHTHYIDAE	Xenopoecilus bonneorum	I	EN
ANIMALIA	CHORDATA	ACTINOPTERYGII	BELONIFORMES	ADRIANICHTHYIDAE	Xenopoecilus poptae	U	EN
ANIMALIA	CHORDATA	ACTINOPTERYGII	BELONIFORMES	ADRIANICHTHYIDAE	Xenopoecilus sarasinorum	I	CR
ANIMALIA	CHORDATA	ACTINOPTERYGII	BELONIFORMES	HEMIRAMPHIDAE	Hyporhamphus xanthopterus	U	VU
ANIMALIA	CHORDATA	ACTINOPTERYGII	BELONIFORMES	HEMIRAMPHIDAE	Nomorhamphus celebensis	I	EN
ANIMALIA	CHORDATA	ACTINOPTERYGII	BELONIFORMES	HEMIRAMPHIDAE	Nomorhamphus megarrhamphus	U	NT
ANIMALIA	CHORDATA	ACTINOPTERYGII	BELONIFORMES	HEMIRAMPHIDAE	Nomorhamphus towoetii	I	VU
ANIMALIA	CHORDATA	ACTINOPTERYGII	BELONIFORMES	HEMIRAMPHIDAE	Nomorhamphus weberi	U	NT
ANIMALIA	CHORDATA	ACTINOPTERYGII	CHARACIFORMES	ALESTIDAE	Alestes bouboni	U	EN
ANIMALIA	CHORDATA	ACTINOPTERYGII	CHARACIFORMES	ALESTIDAE	Alestopetersius nigropterus	I	EN
ANIMALIA	CHORDATA	ACTINOPTERYGII	CHARACIFORMES	ALESTIDAE	Arnoldichthys spilopterus	U	VU
ANIMALIA	CHORDATA	ACTINOPTERYGII	CHARACIFORMES	ALESTIDAE	Brycinus bartoni	U	EN
ANIMALIA	CHORDATA	ACTINOPTERYGII	CHARACIFORMES	ALESTIDAE	Brycinus brevis	U	VU
ANIMALIA	CHORDATA	ACTINOPTERYGII	CHARACIFORMES	ALESTIDAE	Brycinus carolinae	U	VU
ANIMALIA	CHORDATA	ACTINOPTERYGII	CHARACIFORMES	ALESTIDAE	Brycinus derhami	U	VU
ANIMALIA	CHORDATA	ACTINOPTERYGII	CHARACIFORMES	ALESTIDAE	Brycinus luteus	U	VU
ANIMALIA	CHORDATA	ACTINOPTERYGII	CHARACIFORMES	ALESTIDAE	Brycinus nigricauda	U	NT
ANIMALIA	CHORDATA	ACTINOPTERYGII	CHARACIFORMES	ALESTIDAE	Clupeocharax schoutedeni	I	VU
ANIMALIA	CHORDATA	ACTINOPTERYGII	CHARACIFORMES	ALESTIDAE	Ladigesia roloffi	I	EN
ANIMALIA	CHORDATA	ACTINOPTERYGII	CHARACIFORMES	ALESTIDAE	Lepidarchus adonis	I	VU
ANIMALIA	CHORDATA	ACTINOPTERYGII	CHARACIFORMES	ALESTIDAE	Micralestes comoensis	U	VU
ANIMALIA	CHORDATA	ACTINOPTERYGII	CHARACIFORMES	ALESTIDAE	Micralestes eburneensis	U	NT
ANIMALIA	CHORDATA	ACTINOPTERYGII	CHARACIFORMES	ALESTIDAE	Rhabdalestes leleupi	I	CR
ANIMALIA	CHORDATA	ACTINOPTERYGII	CHARACIFORMES	ANOSTOMIDAE	Leporinus muyscorum	I	VU
ANIMALIA	CHORDATA	ACTINOPTERYGII	CHARACIFORMES	BRYCONIDAE	Brycon alburnus	U	NT
ANIMALIA	CHORDATA	ACTINOPTERYGII	CHARACIFORMES	BRYCONIDAE	Brycon moorei	U	VU
ANIMALIA	CHORDATA	ACTINOPTERYGII	CHARACIFORMES	BRYCONIDAE	Brycon orthotaenia	U	VU
ANIMALIA	CHORDATA	ACTINOPTERYGII	CHARACIFORMES	BRYCONIDAE	Brycon posadae	U	NT
ANIMALIA	CHORDATA	ACTINOPTERYGII	CHARACIFORMES	CHARACIDAE	Aphyocharax yekwanae	I	VU
ANIMALIA	CHORDATA	ACTINOPTERYGII	CHARACIFORMES	CHARACIDAE	Astyanax altior	I	VU
ANIMALIA	CHORDATA	ACTINOPTERYGII	CHARACIFORMES	CHARACIDAE	Astyanax cordovae	U	VU
ANIMALIA	CHORDATA	ACTINOPTERYGII	CHARACIFORMES	CHARACIDAE	Astyanax daguae	U	EN
ANIMALIA	CHORDATA	ACTINOPTERYGII	CHARACIFORMES	CHARACIDAE	Astyanax jordani	L	EN
ANIMALIA	CHORDATA	ACTINOPTERYGII	CHARACIFORMES	CHARACIDAE	Astyanax petenensis	U	VU
ANIMALIA	CHORDATA	ACTINOPTERYGII	CHARACIFORMES	CHARACIDAE	Astyanax tamiahua	U	VU
ANIMALIA	CHORDATA	ACTINOPTERYGII	CHARACIFORMES	CHARACIDAE	Astyanax tehuacanensis	U	VU
ANIMALIA	CHORDATA	ACTINOPTERYGII	CHARACIFORMES	CHARACIDAE	Attonitus bounites	U	VU
ANIMALIA	CHORDATA	ACTINOPTERYGII	CHARACIFORMES	CHARACIDAE	Creagrutus gyrospilus	I	VU
ANIMALIA	CHORDATA	ACTINOPTERYGII	CHARACIFORMES	CHARACIDAE	Creagrutus veruina	I	NT
ANIMALIA	CHORDATA	ACTINOPTERYGII	CHARACIFORMES	CHARACIDAE	Cynopotamus atratoensis	U	VU
ANIMALIA	CHORDATA	ACTINOPTERYGII	CHARACIFORMES	CHARACIDAE	Cynopotamus magdalenae	I	NT
ANIMALIA	CHORDATA	ACTINOPTERYGII	CHARACIFORMES	CHARACIDAE	Gymnocharacinus bergii	I	CR
ANIMALIA	CHORDATA	ACTINOPTERYGII	CHARACIFORMES	CHARACIDAE	Hemibrycon inambari	U	NT
ANIMALIA	CHORDATA	ACTINOPTERYGII	CHARACIFORMES	CHARACIDAE	Hyphessobrycon nigricinctus	I	VU
ANIMALIA	CHORDATA	ACTINOPTERYGII	CHARACIFORMES	CHARACIDAE	Hyphessobrycon paucilepis	I	EN
ANIMALIA	CHORDATA	ACTINOPTERYGII	CHARACIFORMES	CHARACIDAE	Hyphessobrycon tuyensis	I	EN
ANIMALIA	CHORDATA	ACTINOPTERYGII	CHARACIFORMES	CHARACIDAE	Knodus longus	U	VU
ANIMALIA	CHORDATA	ACTINOPTERYGII	CHARACIFORMES	CHARACIDAE	Knodus shinahota	I	CR
ANIMALIA	CHORDATA	ACTINOPTERYGII	CHARACIFORMES	CHARACIDAE	Moenkhausia margitae	U	NT
ANIMALIA	CHORDATA	ACTINOPTERYGII	CHARACIFORMES	CHARACIDAE	Oligosarcus schindleri	I	EN
ANIMALIA	CHORDATA	ACTINOPTERYGII	CHARACIFORMES	CHARACIDAE	Pseudochalceus longianalis	U	VU
ANIMALIA	CHORDATA	ACTINOPTERYGII	CHARACIFORMES	CITHARINIDAE	Citharinus eburneensis	U	NT
ANIMALIA	CHORDATA	ACTINOPTERYGII	CHARACIFORMES	CURIMATIDAE	Curimata mivartii	U	NT
ANIMALIA	CHORDATA	ACTINOPTERYGII	CHARACIFORMES	CURIMATIDAE	Pseudocurimata patiae	U	EN
ANIMALIA	CHORDATA	ACTINOPTERYGII	CHARACIFORMES	DISTICHODONTIDAE	Distichodus petersii	I	VU
ANIMALIA	CHORDATA	ACTINOPTERYGII	CHARACIFORMES	DISTICHODONTIDAE	Ichthyborus quadrilineatus	U	NT
ANIMALIA	CHORDATA	ACTINOPTERYGII	CHARACIFORMES	DISTICHODONTIDAE	Nannocharax altus	U	EN
ANIMALIA	CHORDATA	ACTINOPTERYGII	CHARACIFORMES	DISTICHODONTIDAE	Neolebias axelrodi	U	EN
ANIMALIA	CHORDATA	ACTINOPTERYGII	CHARACIFORMES	DISTICHODONTIDAE	Neolebias kerguennae	U	EN
ANIMALIA	CHORDATA	ACTINOPTERYGII	CHARACIFORMES	IGUANODECTIDAE	Bryconops imitator	I	NT
ANIMALIA	CHORDATA	ACTINOPTERYGII	CHARACIFORMES	IGUANODECTIDAE	Bryconops vibex	I	NT
ANIMALIA	CHORDATA	ACTINOPTERYGII	CHARACIFORMES	LEBIASINIDAE	Lebiasina provenzanoi	I	VU
ANIMALIA	CHORDATA	ACTINOPTERYGII	CHARACIFORMES	LEBIASINIDAE	Lebiasina taphorni	I	NT
ANIMALIA	CHORDATA	ACTINOPTERYGII	CHARACIFORMES	LEBIASINIDAE	Lebiasina yuruaniensis	I	NT
ANIMALIA	CHORDATA	ACTINOPTERYGII	CHARACIFORMES	LEBIASINIDAE	Nannostomus mortenthaleri	L	CR
ANIMALIA	CHORDATA	ACTINOPTERYGII	CHARACIFORMES	PROCHILODONTIDAE	Ichthyoelephas longirostris	U	VU
ANIMALIA	CHORDATA	ACTINOPTERYGII	CLUPEIFORMES	CLUPEIDAE	Alosa immaculata	U	VU
ANIMALIA	CHORDATA	ACTINOPTERYGII	CLUPEIFORMES	CLUPEIDAE	Alosa macedonica	U	VU
ANIMALIA	CHORDATA	ACTINOPTERYGII	CLUPEIFORMES	CLUPEIDAE	Alosa vistonica	I	CR
ANIMALIA	CHORDATA	ACTINOPTERYGII	CLUPEIFORMES	CLUPEIDAE	Alosa volgensis	U	EN
ANIMALIA	CHORDATA	ACTINOPTERYGII	CLUPEIFORMES	CLUPEIDAE	Clupeichthys bleekeri	I	VU
ANIMALIA	CHORDATA	ACTINOPTERYGII	CLUPEIFORMES	CLUPEIDAE	Clupeoides venulosus	I	VU
ANIMALIA	CHORDATA	ACTINOPTERYGII	CLUPEIFORMES	CLUPEIDAE	Clupeonella engrauliformis	L	EN
ANIMALIA	CHORDATA	ACTINOPTERYGII	CLUPEIFORMES	CLUPEIDAE	Clupeonella grimmi	L	EN
ANIMALIA	CHORDATA	ACTINOPTERYGII	CLUPEIFORMES	CLUPEIDAE	Clupeonella muhlisi	L	EN
ANIMALIA	CHORDATA	ACTINOPTERYGII	CLUPEIFORMES	CLUPEIDAE	Microthrissa minuta	I	VU
ANIMALIA	CHORDATA	ACTINOPTERYGII	CLUPEIFORMES	CLUPEIDAE	Nannothrissa stewarti	I	EN
ANIMALIA	CHORDATA	ACTINOPTERYGII	CLUPEIFORMES	CLUPEIDAE	Opisthonema berlangai	U	VU
ANIMALIA	CHORDATA	ACTINOPTERYGII	CLUPEIFORMES	CLUPEIDAE	Poecilothrissa moeruensis	I	VU
ANIMALIA	CHORDATA	ACTINOPTERYGII	CLUPEIFORMES	CLUPEIDAE	Sardinella lemuru	L	NT
ANIMALIA	CHORDATA	ACTINOPTERYGII	CLUPEIFORMES	CLUPEIDAE	Sardinella maderensis	U	VU
ANIMALIA	CHORDATA	ACTINOPTERYGII	CLUPEIFORMES	CLUPEIDAE	Sardinella tawilis	I	EN
ANIMALIA	CHORDATA	ACTINOPTERYGII	CLUPEIFORMES	CLUPEIDAE	Sauvagella robusta	U	EN
ANIMALIA	CHORDATA	ACTINOPTERYGII	CLUPEIFORMES	CLUPEIDAE	Tenualosa macrura	L	NT
ANIMALIA	CHORDATA	ACTINOPTERYGII	CLUPEIFORMES	CLUPEIDAE	Tenualosa thibaudeaui	U	VU
ANIMALIA	CHORDATA	ACTINOPTERYGII	CLUPEIFORMES	CLUPEIDAE	Tenualosa toli	L	VU
ANIMALIA	CHORDATA	ACTINOPTERYGII	CLUPEIFORMES	DENTICIPITIDAE	Denticeps clupeoides	U	VU
ANIMALIA	CHORDATA	ACTINOPTERYGII	CLUPEIFORMES	ENGRAULIDAE	Anchoa choerostoma	U	EN
ANIMALIA	CHORDATA	ACTINOPTERYGII	CLUPEIFORMES	ENGRAULIDAE	Coilia mystus	I	EN
ANIMALIA	CHORDATA	ACTINOPTERYGII	CLUPEIFORMES	ENGRAULIDAE	Coilia nasus	U	EN
ANIMALIA	CHORDATA	ACTINOPTERYGII	CLUPEIFORMES	ENGRAULIDAE	Engraulis anchoita	U	NT
ANIMALIA	CHORDATA	ACTINOPTERYGII	CLUPEIFORMES	ENGRAULIDAE	Thryssa rastrosa	I	EN
ANIMALIA	CHORDATA	ACTINOPTERYGII	CYPRINIFORMES	BALITORIDAE	Aborichthys garoensis	U	VU
ANIMALIA	CHORDATA	ACTINOPTERYGII	CYPRINIFORMES	BALITORIDAE	Balitora mysorensis	I	VU
ANIMALIA	CHORDATA	ACTINOPTERYGII	CYPRINIFORMES	BALITORIDAE	Balitoropsis ophiolepis	I	VU
ANIMALIA	CHORDATA	ACTINOPTERYGII	CYPRINIFORMES	BALITORIDAE	Gastromyzon aequabilis	L	NT
ANIMALIA	CHORDATA	ACTINOPTERYGII	CYPRINIFORMES	BALITORIDAE	Gastromyzon auronigrus	L	NT
ANIMALIA	CHORDATA	ACTINOPTERYGII	CYPRINIFORMES	BALITORIDAE	Gastromyzon borneensis	L	NT
ANIMALIA	CHORDATA	ACTINOPTERYGII	CYPRINIFORMES	BALITORIDAE	Gastromyzon cornusaccus	I	NT
ANIMALIA	CHORDATA	ACTINOPTERYGII	CYPRINIFORMES	BALITORIDAE	Gastromyzon crenastus	I	VU
ANIMALIA	CHORDATA	ACTINOPTERYGII	CYPRINIFORMES	BALITORIDAE	Gastromyzon ctenocephalus	L	NT
ANIMALIA	CHORDATA	ACTINOPTERYGII	CYPRINIFORMES	BALITORIDAE	Gastromyzon extrorsus	L	NT
ANIMALIA	CHORDATA	ACTINOPTERYGII	CYPRINIFORMES	BALITORIDAE	Gastromyzon farragus	L	VU
ANIMALIA	CHORDATA	ACTINOPTERYGII	CYPRINIFORMES	BALITORIDAE	Gastromyzon ingeri	L	NT
ANIMALIA	CHORDATA	ACTINOPTERYGII	CYPRINIFORMES	BALITORIDAE	Gastromyzon ocellatus	L	NT
ANIMALIA	CHORDATA	ACTINOPTERYGII	CYPRINIFORMES	BALITORIDAE	Gastromyzon pariclavis	L	NT
ANIMALIA	CHORDATA	ACTINOPTERYGII	CYPRINIFORMES	BALITORIDAE	Gastromyzon scitulus	L	VU
ANIMALIA	CHORDATA	ACTINOPTERYGII	CYPRINIFORMES	BALITORIDAE	Gastromyzon spectabilis	L	NT
ANIMALIA	CHORDATA	ACTINOPTERYGII	CYPRINIFORMES	BALITORIDAE	Gastromyzon umbrus	L	NT
ANIMALIA	CHORDATA	ACTINOPTERYGII	CYPRINIFORMES	BALITORIDAE	Gastromyzon zebrinus	L	NT
ANIMALIA	CHORDATA	ACTINOPTERYGII	CYPRINIFORMES	BALITORIDAE	Hemimyzon confluens	U	VU
ANIMALIA	CHORDATA	ACTINOPTERYGII	CYPRINIFORMES	BALITORIDAE	Homaloptera ocellata	U	VU
ANIMALIA	CHORDATA	ACTINOPTERYGII	CYPRINIFORMES	BALITORIDAE	Homalopteroides wassinkii	U	VU
ANIMALIA	CHORDATA	ACTINOPTERYGII	CYPRINIFORMES	BALITORIDAE	Homalopterula heterolepis	I	NT
ANIMALIA	CHORDATA	ACTINOPTERYGII	CYPRINIFORMES	BALITORIDAE	Hypergastromyzon eubranchus	I	NT
ANIMALIA	CHORDATA	ACTINOPTERYGII	CYPRINIFORMES	BALITORIDAE	Longischistura striatus	L	EN
ANIMALIA	CHORDATA	ACTINOPTERYGII	CYPRINIFORMES	BALITORIDAE	Mesonoemacheilus herrei	I	CR
ANIMALIA	CHORDATA	ACTINOPTERYGII	CYPRINIFORMES	BALITORIDAE	Nemacheilus banar	U	VU
ANIMALIA	CHORDATA	ACTINOPTERYGII	CYPRINIFORMES	BALITORIDAE	Nemacheilus keralensis	I	VU
ANIMALIA	CHORDATA	ACTINOPTERYGII	CYPRINIFORMES	BALITORIDAE	Nemacheilus menoni	U	VU
ANIMALIA	CHORDATA	ACTINOPTERYGII	CYPRINIFORMES	BALITORIDAE	Nemacheilus papillosus	I	VU
ANIMALIA	CHORDATA	ACTINOPTERYGII	CYPRINIFORMES	BALITORIDAE	Nemacheilus pavonaceus	U	VU
ANIMALIA	CHORDATA	ACTINOPTERYGII	CYPRINIFORMES	BALITORIDAE	Nemacheilus petrubanarescui	I	EN
ANIMALIA	CHORDATA	ACTINOPTERYGII	CYPRINIFORMES	BALITORIDAE	Nemacheilus pulchellus	U	EN
ANIMALIA	CHORDATA	ACTINOPTERYGII	CYPRINIFORMES	BALITORIDAE	Nemacheilus tebo	I	VU
ANIMALIA	CHORDATA	ACTINOPTERYGII	CYPRINIFORMES	BALITORIDAE	Nemacheilus troglocataractus	L	CR
ANIMALIA	CHORDATA	ACTINOPTERYGII	CYPRINIFORMES	BALITORIDAE	Nemacheilus tuberigum	I	VU
ANIMALIA	CHORDATA	ACTINOPTERYGII	CYPRINIFORMES	BALITORIDAE	Nemachilichthys shimogensis	U	EN
ANIMALIA	CHORDATA	ACTINOPTERYGII	CYPRINIFORMES	BALITORIDAE	Neogastromyzon crassiobex	I	NT
ANIMALIA	CHORDATA	ACTINOPTERYGII	CYPRINIFORMES	BALITORIDAE	Neogastromyzon pauciradiatus	I	NT
ANIMALIA	CHORDATA	ACTINOPTERYGII	CYPRINIFORMES	BALITORIDAE	Neonoemacheilus assamensis	U	NT
ANIMALIA	CHORDATA	ACTINOPTERYGII	CYPRINIFORMES	BALITORIDAE	Oxynoemacheilus anatolicus	U	EN
ANIMALIA	CHORDATA	ACTINOPTERYGII	CYPRINIFORMES	BALITORIDAE	Oxynoemacheilus hamwii	U	EN
ANIMALIA	CHORDATA	ACTINOPTERYGII	CYPRINIFORMES	BALITORIDAE	Oxynoemacheilus phoxinoides	U	CR
ANIMALIA	CHORDATA	ACTINOPTERYGII	CYPRINIFORMES	BALITORIDAE	Paraschistura chrysicristinae	U	CR
ANIMALIA	CHORDATA	ACTINOPTERYGII	CYPRINIFORMES	BALITORIDAE	Physoschistura elongata	U	VU
ANIMALIA	CHORDATA	ACTINOPTERYGII	CYPRINIFORMES	BALITORIDAE	Protomyzon borneensis	U	NT
ANIMALIA	CHORDATA	ACTINOPTERYGII	CYPRINIFORMES	BALITORIDAE	Schistura atra	U	VU
ANIMALIA	CHORDATA	ACTINOPTERYGII	CYPRINIFORMES	BALITORIDAE	Schistura bolavenensis	U	EN
ANIMALIA	CHORDATA	ACTINOPTERYGII	CYPRINIFORMES	BALITORIDAE	Schistura chindwinica	I	VU
ANIMALIA	CHORDATA	ACTINOPTERYGII	CYPRINIFORMES	BALITORIDAE	Schistura deansmarti	I	VU
ANIMALIA	CHORDATA	ACTINOPTERYGII	CYPRINIFORMES	BALITORIDAE	Schistura devdevi	I	NT
ANIMALIA	CHORDATA	ACTINOPTERYGII	CYPRINIFORMES	BALITORIDAE	Schistura jarutanini	I	VU
ANIMALIA	CHORDATA	ACTINOPTERYGII	CYPRINIFORMES	BALITORIDAE	Schistura kaysonei	I	VU
ANIMALIA	CHORDATA	ACTINOPTERYGII	CYPRINIFORMES	BALITORIDAE	Schistura kontumensis	U	VU
ANIMALIA	CHORDATA	ACTINOPTERYGII	CYPRINIFORMES	BALITORIDAE	Schistura leukensis	U	CR
ANIMALIA	CHORDATA	ACTINOPTERYGII	CYPRINIFORMES	BALITORIDAE	Schistura madhavai	I	CR
ANIMALIA	CHORDATA	ACTINOPTERYGII	CYPRINIFORMES	BALITORIDAE	Schistura minuta	U	EN
ANIMALIA	CHORDATA	ACTINOPTERYGII	CYPRINIFORMES	BALITORIDAE	Schistura nagaensis	I	VU
ANIMALIA	CHORDATA	ACTINOPTERYGII	CYPRINIFORMES	BALITORIDAE	Schistura nasifilis	I	CR
ANIMALIA	CHORDATA	ACTINOPTERYGII	CYPRINIFORMES	BALITORIDAE	Schistura notostigma	I	NT
ANIMALIA	CHORDATA	ACTINOPTERYGII	CYPRINIFORMES	BALITORIDAE	Schistura nudidorsum	U	EN
ANIMALIA	CHORDATA	ACTINOPTERYGII	CYPRINIFORMES	BALITORIDAE	Schistura oedipus	I	VU
ANIMALIA	CHORDATA	ACTINOPTERYGII	CYPRINIFORMES	BALITORIDAE	Schistura prashadi	U	VU
ANIMALIA	CHORDATA	ACTINOPTERYGII	CYPRINIFORMES	BALITORIDAE	Schistura pridii	I	EN
ANIMALIA	CHORDATA	ACTINOPTERYGII	CYPRINIFORMES	BALITORIDAE	Schistura quasimodo	U	EN
ANIMALIA	CHORDATA	ACTINOPTERYGII	CYPRINIFORMES	BALITORIDAE	Schistura reticulata	U	EN
ANIMALIA	CHORDATA	ACTINOPTERYGII	CYPRINIFORMES	BALITORIDAE	Schistura reticulofasciata	I	VU
ANIMALIA	CHORDATA	ACTINOPTERYGII	CYPRINIFORMES	BALITORIDAE	Schistura scripta	I	CR
ANIMALIA	CHORDATA	ACTINOPTERYGII	CYPRINIFORMES	BALITORIDAE	Schistura sijuensis	U	EN
ANIMALIA	CHORDATA	ACTINOPTERYGII	CYPRINIFORMES	BALITORIDAE	Schistura singhi	U	VU
ANIMALIA	CHORDATA	ACTINOPTERYGII	CYPRINIFORMES	BALITORIDAE	Schistura spekuli	I	VU
ANIMALIA	CHORDATA	ACTINOPTERYGII	CYPRINIFORMES	BALITORIDAE	Schistura spiesi	I	VU
ANIMALIA	CHORDATA	ACTINOPTERYGII	CYPRINIFORMES	BALITORIDAE	Schistura spiloptera	U	CR
ANIMALIA	CHORDATA	ACTINOPTERYGII	CYPRINIFORMES	BALITORIDAE	Schistura tenura	U	CR
ANIMALIA	CHORDATA	ACTINOPTERYGII	CYPRINIFORMES	BALITORIDAE	Schistura thanho	U	EN
ANIMALIA	CHORDATA	ACTINOPTERYGII	CYPRINIFORMES	BALITORIDAE	Schistura tigrina	U	EN
ANIMALIA	CHORDATA	ACTINOPTERYGII	CYPRINIFORMES	BALITORIDAE	Sewellia albisuera	L	CR
ANIMALIA	CHORDATA	ACTINOPTERYGII	CYPRINIFORMES	BALITORIDAE	Sewellia breviventralis	I	CR
ANIMALIA	CHORDATA	ACTINOPTERYGII	CYPRINIFORMES	BALITORIDAE	Sewellia elongata	U	NT
ANIMALIA	CHORDATA	ACTINOPTERYGII	CYPRINIFORMES	BALITORIDAE	Sewellia lineolata	I	VU
ANIMALIA	CHORDATA	ACTINOPTERYGII	CYPRINIFORMES	BALITORIDAE	Sewellia marmorata	L	EN
ANIMALIA	CHORDATA	ACTINOPTERYGII	CYPRINIFORMES	BALITORIDAE	Sewellia patella	U	EN
ANIMALIA	CHORDATA	ACTINOPTERYGII	CYPRINIFORMES	BALITORIDAE	Sewellia pterolineata	U	EN
ANIMALIA	CHORDATA	ACTINOPTERYGII	CYPRINIFORMES	BALITORIDAE	Travancoria elongata	L	EN
ANIMALIA	CHORDATA	ACTINOPTERYGII	CYPRINIFORMES	BALITORIDAE	Travancoria jonesi	I	EN
ANIMALIA	CHORDATA	ACTINOPTERYGII	CYPRINIFORMES	BALITORIDAE	Yunnanilus discoloris	U	CR
ANIMALIA	CHORDATA	ACTINOPTERYGII	CYPRINIFORMES	CATOSTOMIDAE	Catostomus leopoldi	U	VU
ANIMALIA	CHORDATA	ACTINOPTERYGII	CYPRINIFORMES	CATOSTOMIDAE	Catostomus santaanae	U	EN
ANIMALIA	CHORDATA	ACTINOPTERYGII	CYPRINIFORMES	CATOSTOMIDAE	Catostomus snyderi	U	NT
ANIMALIA	CHORDATA	ACTINOPTERYGII	CYPRINIFORMES	CATOSTOMIDAE	Catostomus warnerensis	U	EN
ANIMALIA	CHORDATA	ACTINOPTERYGII	CYPRINIFORMES	CATOSTOMIDAE	Catostomus wigginsi	I	VU
ANIMALIA	CHORDATA	ACTINOPTERYGII	CYPRINIFORMES	CATOSTOMIDAE	Chasmistes liorus	U	CR
ANIMALIA	CHORDATA	ACTINOPTERYGII	CYPRINIFORMES	CATOSTOMIDAE	Deltistes luxatus	U	EN
ANIMALIA	CHORDATA	ACTINOPTERYGII	CYPRINIFORMES	CATOSTOMIDAE	Moxostoma mascotae	I	VU
ANIMALIA	CHORDATA	ACTINOPTERYGII	CYPRINIFORMES	CATOSTOMIDAE	Moxostoma robustum	U	EN
ANIMALIA	CHORDATA	ACTINOPTERYGII	CYPRINIFORMES	CATOSTOMIDAE	Xyrauchen texanus	U	CR
ANIMALIA	CHORDATA	ACTINOPTERYGII	CYPRINIFORMES	COBITIDAE	Acantopsis multistigmatus	I	NT
ANIMALIA	CHORDATA	ACTINOPTERYGII	CYPRINIFORMES	COBITIDAE	Acantopsis octoactinotos	U	VU
ANIMALIA	CHORDATA	ACTINOPTERYGII	CYPRINIFORMES	COBITIDAE	Botia rostrata	I	VU
ANIMALIA	CHORDATA	ACTINOPTERYGII	CYPRINIFORMES	COBITIDAE	Botia striata	I	EN
ANIMALIA	CHORDATA	ACTINOPTERYGII	CYPRINIFORMES	COBITIDAE	Cobitis bilseli	U	EN
ANIMALIA	CHORDATA	ACTINOPTERYGII	CYPRINIFORMES	COBITIDAE	Cobitis kaibarai	U	VU
ANIMALIA	CHORDATA	ACTINOPTERYGII	CYPRINIFORMES	COBITIDAE	Cobitis kellei	U	CR
ANIMALIA	CHORDATA	ACTINOPTERYGII	CYPRINIFORMES	COBITIDAE	Cobitis minamorii	U	NT
ANIMALIA	CHORDATA	ACTINOPTERYGII	CYPRINIFORMES	COBITIDAE	Cobitis paludica	I	VU
ANIMALIA	CHORDATA	ACTINOPTERYGII	CYPRINIFORMES	COBITIDAE	Cobitis shikokuensis	U	VU
ANIMALIA	CHORDATA	ACTINOPTERYGII	CYPRINIFORMES	COBITIDAE	Cobitis splendens	U	CR
ANIMALIA	CHORDATA	ACTINOPTERYGII	CYPRINIFORMES	COBITIDAE	Cobitis takatsuensis	U	NT
ANIMALIA	CHORDATA	ACTINOPTERYGII	CYPRINIFORMES	COBITIDAE	Cobitis takenoi	U	CR
ANIMALIA	CHORDATA	ACTINOPTERYGII	CYPRINIFORMES	COBITIDAE	Cobitis turcica	U	EN
ANIMALIA	CHORDATA	ACTINOPTERYGII	CYPRINIFORMES	COBITIDAE	Lepidocephalichthys arunachalensis	I	EN
ANIMALIA	CHORDATA	ACTINOPTERYGII	CYPRINIFORMES	COBITIDAE	Lepidocephalichthys jonklaasi	I	EN
ANIMALIA	CHORDATA	ACTINOPTERYGII	CYPRINIFORMES	COBITIDAE	Lepidocephalus pahangensis	I	CR
ANIMALIA	CHORDATA	ACTINOPTERYGII	CYPRINIFORMES	COBITIDAE	Leptobotia elongata	L	VU
ANIMALIA	CHORDATA	ACTINOPTERYGII	CYPRINIFORMES	COBITIDAE	Parabotia curtus	U	CR
ANIMALIA	CHORDATA	ACTINOPTERYGII	CYPRINIFORMES	COBITIDAE	Paralepidocephalus yui	U	EN
ANIMALIA	CHORDATA	ACTINOPTERYGII	CYPRINIFORMES	COBITIDAE	Serpenticobitis cingulata	U	VU
ANIMALIA	CHORDATA	ACTINOPTERYGII	CYPRINIFORMES	COBITIDAE	Syncrossus beauforti	L	NT
ANIMALIA	CHORDATA	ACTINOPTERYGII	CYPRINIFORMES	COBITIDAE	Syncrossus berdmorei	L	NT
ANIMALIA	CHORDATA	ACTINOPTERYGII	CYPRINIFORMES	COBITIDAE	Yasuhikotakia nigrolineata	L	VU
ANIMALIA	CHORDATA	ACTINOPTERYGII	CYPRINIFORMES	COBITIDAE	Yasuhikotakia sidthimunki	I	EN
ANIMALIA	CHORDATA	ACTINOPTERYGII	CYPRINIFORMES	COBITIDAE	Yasuhikotakia splendida	I	VU
ANIMALIA	CHORDATA	ACTINOPTERYGII	CYPRINIFORMES	CYPRINIDAE	Aaptosyax grypus	U	CR
ANIMALIA	CHORDATA	ACTINOPTERYGII	CYPRINIFORMES	CYPRINIDAE	Acanthobrama hadiyahensis	I	CR
ANIMALIA	CHORDATA	ACTINOPTERYGII	CYPRINIFORMES	CYPRINIDAE	Acanthobrama tricolor	U	CR
ANIMALIA	CHORDATA	ACTINOPTERYGII	CYPRINIFORMES	CYPRINIDAE	Acheilognathus cyanostigma	U	EN
ANIMALIA	CHORDATA	ACTINOPTERYGII	CYPRINIFORMES	CYPRINIDAE	Acheilognathus elongatus	U	CR
ANIMALIA	CHORDATA	ACTINOPTERYGII	CYPRINIFORMES	CYPRINIDAE	Acheilognathus longipinnis	U	EN
ANIMALIA	CHORDATA	ACTINOPTERYGII	CYPRINIFORMES	CYPRINIDAE	Acheilognathus melanogaster	U	VU
ANIMALIA	CHORDATA	ACTINOPTERYGII	CYPRINIFORMES	CYPRINIDAE	Acheilognathus tabira	U	NT
ANIMALIA	CHORDATA	ACTINOPTERYGII	CYPRINIFORMES	CYPRINIDAE	Acheilognathus typus	U	VU
ANIMALIA	CHORDATA	ACTINOPTERYGII	CYPRINIFORMES	CYPRINIDAE	Acrossocheilus rendahli	U	NT
ANIMALIA	CHORDATA	ACTINOPTERYGII	CYPRINIFORMES	CYPRINIDAE	Alburnus baliki	U	EN
ANIMALIA	CHORDATA	ACTINOPTERYGII	CYPRINIFORMES	CYPRINIDAE	Alburnus belvica	U	VU
ANIMALIA	CHORDATA	ACTINOPTERYGII	CYPRINIFORMES	CYPRINIDAE	Alburnus demiri	U	VU
ANIMALIA	CHORDATA	ACTINOPTERYGII	CYPRINIFORMES	CYPRINIDAE	Alburnus mentoides	U	EN
ANIMALIA	CHORDATA	ACTINOPTERYGII	CYPRINIFORMES	CYPRINIDAE	Alburnus qalilus	U	EN
ANIMALIA	CHORDATA	ACTINOPTERYGII	CYPRINIFORMES	CYPRINIDAE	Alburnus sarmaticus	L	EN
ANIMALIA	CHORDATA	ACTINOPTERYGII	CYPRINIFORMES	CYPRINIDAE	Alburnus schischkovi	L	EN
ANIMALIA	CHORDATA	ACTINOPTERYGII	CYPRINIFORMES	CYPRINIDAE	Alburnus tarichi	U	NT
ANIMALIA	CHORDATA	ACTINOPTERYGII	CYPRINIFORMES	CYPRINIDAE	Alburnus vistonicus	U	CR
ANIMALIA	CHORDATA	ACTINOPTERYGII	CYPRINIFORMES	CYPRINIDAE	Algansea amecae	I	EN
ANIMALIA	CHORDATA	ACTINOPTERYGII	CYPRINIFORMES	CYPRINIDAE	Algansea aphanea	I	EN
ANIMALIA	CHORDATA	ACTINOPTERYGII	CYPRINIFORMES	CYPRINIDAE	Algansea avia	U	EN
ANIMALIA	CHORDATA	ACTINOPTERYGII	CYPRINIFORMES	CYPRINIDAE	Algansea barbata	U	CR
ANIMALIA	CHORDATA	ACTINOPTERYGII	CYPRINIFORMES	CYPRINIDAE	Algansea monticola	I	NT
ANIMALIA	CHORDATA	ACTINOPTERYGII	CYPRINIFORMES	CYPRINIDAE	Algansea popoche	U	EN
ANIMALIA	CHORDATA	ACTINOPTERYGII	CYPRINIFORMES	CYPRINIDAE	Anabarilius alburnops	U	EN
ANIMALIA	CHORDATA	ACTINOPTERYGII	CYPRINIFORMES	CYPRINIDAE	Anabarilius andersoni	U	CR
ANIMALIA	CHORDATA	ACTINOPTERYGII	CYPRINIFORMES	CYPRINIDAE	Anabarilius polylepis	U	EN
ANIMALIA	CHORDATA	ACTINOPTERYGII	CYPRINIFORMES	CYPRINIDAE	Anabarilius qiluensis	U	CR
ANIMALIA	CHORDATA	ACTINOPTERYGII	CYPRINIFORMES	CYPRINIDAE	Anabarilius yangzonensis	U	CR
ANIMALIA	CHORDATA	ACTINOPTERYGII	CYPRINIFORMES	CYPRINIDAE	Arabibarbus grypus	U	VU
ANIMALIA	CHORDATA	ACTINOPTERYGII	CYPRINIFORMES	CYPRINIDAE	Balantiocheilos ambusticauda	I	CR
ANIMALIA	CHORDATA	ACTINOPTERYGII	CYPRINIFORMES	CYPRINIDAE	Bangana almorae	U	VU
ANIMALIA	CHORDATA	ACTINOPTERYGII	CYPRINIFORMES	CYPRINIDAE	Bangana behri	I	VU
ANIMALIA	CHORDATA	ACTINOPTERYGII	CYPRINIFORMES	CYPRINIDAE	Bangana elegans	U	NT
ANIMALIA	CHORDATA	ACTINOPTERYGII	CYPRINIFORMES	CYPRINIDAE	Bangana musaei	I	VU
ANIMALIA	CHORDATA	ACTINOPTERYGII	CYPRINIFORMES	CYPRINIDAE	Barbodes amarus	U	CR
ANIMALIA	CHORDATA	ACTINOPTERYGII	CYPRINIFORMES	CYPRINIDAE	Barbodes baoulan	U	CR
ANIMALIA	CHORDATA	ACTINOPTERYGII	CYPRINIFORMES	CYPRINIDAE	Barbodes bunau	U	VU
ANIMALIA	CHORDATA	ACTINOPTERYGII	CYPRINIFORMES	CYPRINIDAE	Barbodes clemensi	U	CR
ANIMALIA	CHORDATA	ACTINOPTERYGII	CYPRINIFORMES	CYPRINIDAE	Barbodes disa	U	CR
ANIMALIA	CHORDATA	ACTINOPTERYGII	CYPRINIFORMES	CYPRINIDAE	Barbodes dunckeri	L	EN
ANIMALIA	CHORDATA	ACTINOPTERYGII	CYPRINIFORMES	CYPRINIDAE	Barbodes flavifuscus	U	CR
ANIMALIA	CHORDATA	ACTINOPTERYGII	CYPRINIFORMES	CYPRINIDAE	Barbodes herrei	U	CR
ANIMALIA	CHORDATA	ACTINOPTERYGII	CYPRINIFORMES	CYPRINIDAE	Barbodes katolo	U	CR
ANIMALIA	CHORDATA	ACTINOPTERYGII	CYPRINIFORMES	CYPRINIDAE	Barbodes lanaoensis	U	CR
ANIMALIA	CHORDATA	ACTINOPTERYGII	CYPRINIFORMES	CYPRINIDAE	Barbodes lindog	I	VU
ANIMALIA	CHORDATA	ACTINOPTERYGII	CYPRINIFORMES	CYPRINIDAE	Barbodes manalak	U	CR
ANIMALIA	CHORDATA	ACTINOPTERYGII	CYPRINIFORMES	CYPRINIDAE	Barbodes pachycheilus	U	CR
ANIMALIA	CHORDATA	ACTINOPTERYGII	CYPRINIFORMES	CYPRINIDAE	Barbodes palaemophagus	U	EN
ANIMALIA	CHORDATA	ACTINOPTERYGII	CYPRINIFORMES	CYPRINIDAE	Barbodes palata	U	CR
ANIMALIA	CHORDATA	ACTINOPTERYGII	CYPRINIFORMES	CYPRINIDAE	Barbodes resimus	U	CR
ANIMALIA	CHORDATA	ACTINOPTERYGII	CYPRINIFORMES	CYPRINIDAE	Barbodes sirang	U	VU
ANIMALIA	CHORDATA	ACTINOPTERYGII	CYPRINIFORMES	CYPRINIDAE	Barbodes tras	U	CR
ANIMALIA	CHORDATA	ACTINOPTERYGII	CYPRINIFORMES	CYPRINIDAE	Barbodes truncatulus	U	CR
ANIMALIA	CHORDATA	ACTINOPTERYGII	CYPRINIFORMES	CYPRINIDAE	Barbodes tumba	U	VU
ANIMALIA	CHORDATA	ACTINOPTERYGII	CYPRINIFORMES	CYPRINIDAE	Barbodes wynaadensis	U	CR
ANIMALIA	CHORDATA	ACTINOPTERYGII	CYPRINIFORMES	CYPRINIDAE	Barbonymus platysoma	U	CR
ANIMALIA	CHORDATA	ACTINOPTERYGII	CYPRINIFORMES	CYPRINIDAE	Barbus sp. nov. 'Banhine'	U	CR
ANIMALIA	CHORDATA	ACTINOPTERYGII	CYPRINIFORMES	CYPRINIDAE	Barbus sp. nov. 'Chimanimani'	I	VU
ANIMALIA	CHORDATA	ACTINOPTERYGII	CYPRINIFORMES	CYPRINIDAE	Barbus tyberinus	I	NT
ANIMALIA	CHORDATA	ACTINOPTERYGII	CYPRINIFORMES	CYPRINIDAE	Barilius canarensis	I	EN
ANIMALIA	CHORDATA	ACTINOPTERYGII	CYPRINIFORMES	CYPRINIDAE	Barilius chatricensis	I	VU
ANIMALIA	CHORDATA	ACTINOPTERYGII	CYPRINIFORMES	CYPRINIDAE	Barilius dogarsinghi	I	VU
ANIMALIA	CHORDATA	ACTINOPTERYGII	CYPRINIFORMES	CYPRINIDAE	Barilius ngawa	U	VU
ANIMALIA	CHORDATA	ACTINOPTERYGII	CYPRINIFORMES	CYPRINIDAE	Boraras urophthalmoides	I	NT
ANIMALIA	CHORDATA	ACTINOPTERYGII	CYPRINIFORMES	CYPRINIDAE	Brevibora dorsiocellata	I	EN
ANIMALIA	CHORDATA	ACTINOPTERYGII	CYPRINIFORMES	CYPRINIDAE	Capoeta ekmekciae	U	NT
ANIMALIA	CHORDATA	ACTINOPTERYGII	CYPRINIFORMES	CYPRINIDAE	Carasobarbus apoensis	U	EN
ANIMALIA	CHORDATA	ACTINOPTERYGII	CYPRINIFORMES	CYPRINIDAE	Carasobarbus canis	U	NT
ANIMALIA	CHORDATA	ACTINOPTERYGII	CYPRINIFORMES	CYPRINIDAE	Carasobarbus chantrei	U	NT
ANIMALIA	CHORDATA	ACTINOPTERYGII	CYPRINIFORMES	CYPRINIDAE	Carasobarbus exulatus	U	EN
ANIMALIA	CHORDATA	ACTINOPTERYGII	CYPRINIFORMES	CYPRINIDAE	Carassius cuvieri	U	EN
ANIMALIA	CHORDATA	ACTINOPTERYGII	CYPRINIFORMES	CYPRINIDAE	Catlocarpio siamensis	I	CR
ANIMALIA	CHORDATA	ACTINOPTERYGII	CYPRINIFORMES	CYPRINIDAE	Chelaethiops rukwaensis	I	VU
ANIMALIA	CHORDATA	ACTINOPTERYGII	CYPRINIFORMES	CYPRINIDAE	Chondrostoma prespense	I	VU
ANIMALIA	CHORDATA	ACTINOPTERYGII	CYPRINIFORMES	CYPRINIDAE	Chrosomus saylori	U	EN
ANIMALIA	CHORDATA	ACTINOPTERYGII	CYPRINIFORMES	CYPRINIDAE	Cirrhinus cirrhosus	L	VU
ANIMALIA	CHORDATA	ACTINOPTERYGII	CYPRINIFORMES	CYPRINIDAE	Cirrhinus microlepis	U	VU
ANIMALIA	CHORDATA	ACTINOPTERYGII	CYPRINIFORMES	CYPRINIDAE	Cirrhinus molitorella	U	NT
ANIMALIA	CHORDATA	ACTINOPTERYGII	CYPRINIFORMES	CYPRINIDAE	Clypeobarbus pseudognathodon	U	NT
ANIMALIA	CHORDATA	ACTINOPTERYGII	CYPRINIFORMES	CYPRINIDAE	Cyprinella alvarezdelvillari	I	VU
ANIMALIA	CHORDATA	ACTINOPTERYGII	CYPRINIFORMES	CYPRINIDAE	Cyprinella bocagrande	U	CR
ANIMALIA	CHORDATA	ACTINOPTERYGII	CYPRINIFORMES	CYPRINIDAE	Cyprinella monacha	I	VU
ANIMALIA	CHORDATA	ACTINOPTERYGII	CYPRINIFORMES	CYPRINIDAE	Cyprinella panarcys	U	NT
ANIMALIA	CHORDATA	ACTINOPTERYGII	CYPRINIFORMES	CYPRINIDAE	Cyprinella xanthicara	I	EN
ANIMALIA	CHORDATA	ACTINOPTERYGII	CYPRINIFORMES	CYPRINIDAE	Cyprinion semiplotum	U	VU
ANIMALIA	CHORDATA	ACTINOPTERYGII	CYPRINIFORMES	CYPRINIDAE	Cyprinus barbatus	U	CR
ANIMALIA	CHORDATA	ACTINOPTERYGII	CYPRINIFORMES	CYPRINIDAE	Cyprinus carpio	U	VU
ANIMALIA	CHORDATA	ACTINOPTERYGII	CYPRINIFORMES	CYPRINIDAE	Cyprinus chilia	U	EN
ANIMALIA	CHORDATA	ACTINOPTERYGII	CYPRINIFORMES	CYPRINIDAE	Cyprinus fuxianensis	U	CR
ANIMALIA	CHORDATA	ACTINOPTERYGII	CYPRINIFORMES	CYPRINIDAE	Cyprinus intha	U	EN
ANIMALIA	CHORDATA	ACTINOPTERYGII	CYPRINIFORMES	CYPRINIDAE	Cyprinus micristius	U	CR
ANIMALIA	CHORDATA	ACTINOPTERYGII	CYPRINIFORMES	CYPRINIDAE	Cyprinus multitaeniata	U	NT
ANIMALIA	CHORDATA	ACTINOPTERYGII	CYPRINIFORMES	CYPRINIDAE	Cyprinus qionghaiensis	U	CR
ANIMALIA	CHORDATA	ACTINOPTERYGII	CYPRINIFORMES	CYPRINIDAE	Danio aesculapii	I	NT
ANIMALIA	CHORDATA	ACTINOPTERYGII	CYPRINIFORMES	CYPRINIDAE	Danio erythromicron	I	EN
ANIMALIA	CHORDATA	ACTINOPTERYGII	CYPRINIFORMES	CYPRINIDAE	Danio jaintianensis	I	VU
ANIMALIA	CHORDATA	ACTINOPTERYGII	CYPRINIFORMES	CYPRINIDAE	Danio kyathit	I	NT
ANIMALIA	CHORDATA	ACTINOPTERYGII	CYPRINIFORMES	CYPRINIDAE	Dawkinsia arulius	I	EN
ANIMALIA	CHORDATA	ACTINOPTERYGII	CYPRINIFORMES	CYPRINIDAE	Dawkinsia assimilis	I	VU
ANIMALIA	CHORDATA	ACTINOPTERYGII	CYPRINIFORMES	CYPRINIDAE	Dawkinsia exclamatio	I	EN
ANIMALIA	CHORDATA	ACTINOPTERYGII	CYPRINIFORMES	CYPRINIDAE	Dawkinsia rohani	I	VU
ANIMALIA	CHORDATA	ACTINOPTERYGII	CYPRINIFORMES	CYPRINIDAE	Dawkinsia srilankensis	I	EN
ANIMALIA	CHORDATA	ACTINOPTERYGII	CYPRINIFORMES	CYPRINIDAE	Dawkinsia tambraparniei	U	EN
ANIMALIA	CHORDATA	ACTINOPTERYGII	CYPRINIFORMES	CYPRINIDAE	Delminichthys jadovensis	U	CR
ANIMALIA	CHORDATA	ACTINOPTERYGII	CYPRINIFORMES	CYPRINIDAE	Devario annnataliae	I	CR
ANIMALIA	CHORDATA	ACTINOPTERYGII	CYPRINIFORMES	CYPRINIDAE	Devario anomalus	I	VU
ANIMALIA	CHORDATA	ACTINOPTERYGII	CYPRINIFORMES	CYPRINIDAE	Devario assamensis	I	VU
ANIMALIA	CHORDATA	ACTINOPTERYGII	CYPRINIFORMES	CYPRINIDAE	Devario auropurpureus	L	EN
ANIMALIA	CHORDATA	ACTINOPTERYGII	CYPRINIFORMES	CYPRINIDAE	Devario browni	I	VU
ANIMALIA	CHORDATA	ACTINOPTERYGII	CYPRINIFORMES	CYPRINIDAE	Devario horai	I	EN
ANIMALIA	CHORDATA	ACTINOPTERYGII	CYPRINIFORMES	CYPRINIDAE	Devario micronema	I	EN
ANIMALIA	CHORDATA	ACTINOPTERYGII	CYPRINIFORMES	CYPRINIDAE	Devario monticola	I	CR
ANIMALIA	CHORDATA	ACTINOPTERYGII	CYPRINIFORMES	CYPRINIDAE	Devario naganensis	U	VU
ANIMALIA	CHORDATA	ACTINOPTERYGII	CYPRINIFORMES	CYPRINIDAE	Devario neilgherriensis	U	EN
ANIMALIA	CHORDATA	ACTINOPTERYGII	CYPRINIFORMES	CYPRINIDAE	Devario pathirana	L	EN
ANIMALIA	CHORDATA	ACTINOPTERYGII	CYPRINIFORMES	CYPRINIDAE	Devario xyrops	I	NT
ANIMALIA	CHORDATA	ACTINOPTERYGII	CYPRINIFORMES	CYPRINIDAE	Devario yuensis	I	VU
ANIMALIA	CHORDATA	ACTINOPTERYGII	CYPRINIFORMES	CYPRINIDAE	Enteromius aliciae	U	EN
ANIMALIA	CHORDATA	ACTINOPTERYGII	CYPRINIFORMES	CYPRINIDAE	Enteromius amboseli	U	EN
ANIMALIA	CHORDATA	ACTINOPTERYGII	CYPRINIFORMES	CYPRINIDAE	Enteromius anniae	U	VU
ANIMALIA	CHORDATA	ACTINOPTERYGII	CYPRINIFORMES	CYPRINIDAE	Enteromius bawkuensis	U	EN
ANIMALIA	CHORDATA	ACTINOPTERYGII	CYPRINIFORMES	CYPRINIDAE	Enteromius bigornei	U	NT
ANIMALIA	CHORDATA	ACTINOPTERYGII	CYPRINIFORMES	CYPRINIDAE	Enteromius brevipinnis	U	NT
ANIMALIA	CHORDATA	ACTINOPTERYGII	CYPRINIFORMES	CYPRINIDAE	Enteromius cadenati	U	VU
ANIMALIA	CHORDATA	ACTINOPTERYGII	CYPRINIFORMES	CYPRINIDAE	Enteromius carcharhinoides	U	CR
ANIMALIA	CHORDATA	ACTINOPTERYGII	CYPRINIFORMES	CYPRINIDAE	Enteromius eburneensis	U	VU
ANIMALIA	CHORDATA	ACTINOPTERYGII	CYPRINIFORMES	CYPRINIDAE	Enteromius foutensis	U	EN
ANIMALIA	CHORDATA	ACTINOPTERYGII	CYPRINIFORMES	CYPRINIDAE	Enteromius huguenyi	U	EN
ANIMALIA	CHORDATA	ACTINOPTERYGII	CYPRINIFORMES	CYPRINIDAE	Enteromius kissiensis	U	VU
ANIMALIA	CHORDATA	ACTINOPTERYGII	CYPRINIFORMES	CYPRINIDAE	Enteromius lauzannei	U	EN
ANIMALIA	CHORDATA	ACTINOPTERYGII	CYPRINIFORMES	CYPRINIDAE	Enteromius liberiensis	U	EN
ANIMALIA	CHORDATA	ACTINOPTERYGII	CYPRINIFORMES	CYPRINIDAE	Enteromius melanotaenia	U	CR
ANIMALIA	CHORDATA	ACTINOPTERYGII	CYPRINIFORMES	CYPRINIDAE	Enteromius nigroluteus	U	EN
ANIMALIA	CHORDATA	ACTINOPTERYGII	CYPRINIFORMES	CYPRINIDAE	Enteromius niokoloensis	U	VU
ANIMALIA	CHORDATA	ACTINOPTERYGII	CYPRINIFORMES	CYPRINIDAE	Enteromius salessei	U	VU
ANIMALIA	CHORDATA	ACTINOPTERYGII	CYPRINIFORMES	CYPRINIDAE	Enteromius sp. nov. '1 - Upper Konkoure River basin'	U	EN
ANIMALIA	CHORDATA	ACTINOPTERYGII	CYPRINIFORMES	CYPRINIDAE	Enteromius sp. nov. '2 - Upper Senegal and Gambie River basins'	U	VU
ANIMALIA	CHORDATA	ACTINOPTERYGII	CYPRINIFORMES	CYPRINIDAE	Enteromius sp. nov. 'south africa'	U	NT
ANIMALIA	CHORDATA	ACTINOPTERYGII	CYPRINIFORMES	CYPRINIDAE	Enteromius stauchi	U	EN
ANIMALIA	CHORDATA	ACTINOPTERYGII	CYPRINIFORMES	CYPRINIDAE	Enteromius subinensis	U	EN
ANIMALIA	CHORDATA	ACTINOPTERYGII	CYPRINIFORMES	CYPRINIDAE	Enteromius sylvaticus	U	EN
ANIMALIA	CHORDATA	ACTINOPTERYGII	CYPRINIFORMES	CYPRINIDAE	Enteromius taeniurus	U	VU
ANIMALIA	CHORDATA	ACTINOPTERYGII	CYPRINIFORMES	CYPRINIDAE	Enteromius traorei	U	EN
ANIMALIA	CHORDATA	ACTINOPTERYGII	CYPRINIFORMES	CYPRINIDAE	Enteromius treurensis	I	CR
ANIMALIA	CHORDATA	ACTINOPTERYGII	CYPRINIFORMES	CYPRINIDAE	Enteromius walkeri	U	VU
ANIMALIA	CHORDATA	ACTINOPTERYGII	CYPRINIFORMES	CYPRINIDAE	Enteromius zalbiensis	U	VU
ANIMALIA	CHORDATA	ACTINOPTERYGII	CYPRINIFORMES	CYPRINIDAE	Epalzeorhynchos bicolor	U	CR
ANIMALIA	CHORDATA	ACTINOPTERYGII	CYPRINIFORMES	CYPRINIDAE	Epalzeorhynchos munense	I	VU
ANIMALIA	CHORDATA	ACTINOPTERYGII	CYPRINIFORMES	CYPRINIDAE	Eremichthys acros	U	VU
ANIMALIA	CHORDATA	ACTINOPTERYGII	CYPRINIFORMES	CYPRINIDAE	Folifer yunnanensis	U	EN
ANIMALIA	CHORDATA	ACTINOPTERYGII	CYPRINIFORMES	CYPRINIDAE	Garra allostoma	U	VU
ANIMALIA	CHORDATA	ACTINOPTERYGII	CYPRINIFORMES	CYPRINIDAE	Garra bicornuta	I	NT
ANIMALIA	CHORDATA	ACTINOPTERYGII	CYPRINIFORMES	CYPRINIDAE	Garra buettikeri	U	VU
ANIMALIA	CHORDATA	ACTINOPTERYGII	CYPRINIFORMES	CYPRINIDAE	Garra ceylonensis	L	NT
ANIMALIA	CHORDATA	ACTINOPTERYGII	CYPRINIFORMES	CYPRINIDAE	Garra compressa	U	VU
ANIMALIA	CHORDATA	ACTINOPTERYGII	CYPRINIFORMES	CYPRINIDAE	Garra dunsirei	U	EN
ANIMALIA	CHORDATA	ACTINOPTERYGII	CYPRINIFORMES	CYPRINIDAE	Garra duobarbis	U	VU
ANIMALIA	CHORDATA	ACTINOPTERYGII	CYPRINIFORMES	CYPRINIDAE	Garra elongata	U	NT
ANIMALIA	CHORDATA	ACTINOPTERYGII	CYPRINIFORMES	CYPRINIDAE	Garra flavatra	I	VU
ANIMALIA	CHORDATA	ACTINOPTERYGII	CYPRINIFORMES	CYPRINIDAE	Garra hughi	I	EN
ANIMALIA	CHORDATA	ACTINOPTERYGII	CYPRINIFORMES	CYPRINIDAE	Garra kalakadensis	I	EN
ANIMALIA	CHORDATA	ACTINOPTERYGII	CYPRINIFORMES	CYPRINIDAE	Garra lautior	U	EN
ANIMALIA	CHORDATA	ACTINOPTERYGII	CYPRINIFORMES	CYPRINIDAE	Garra litanensis	I	VU
ANIMALIA	CHORDATA	ACTINOPTERYGII	CYPRINIFORMES	CYPRINIDAE	Garra mamshuqa	U	EN
ANIMALIA	CHORDATA	ACTINOPTERYGII	CYPRINIFORMES	CYPRINIDAE	Garra manipurensis	I	VU
ANIMALIA	CHORDATA	ACTINOPTERYGII	CYPRINIFORMES	CYPRINIDAE	Garra nambulica	U	VU
ANIMALIA	CHORDATA	ACTINOPTERYGII	CYPRINIFORMES	CYPRINIDAE	Garra paralissorhynchus	I	VU
ANIMALIA	CHORDATA	ACTINOPTERYGII	CYPRINIFORMES	CYPRINIDAE	Garra poecilura	I	NT
ANIMALIA	CHORDATA	ACTINOPTERYGII	CYPRINIFORMES	CYPRINIDAE	Garra propulvinus	I	NT
ANIMALIA	CHORDATA	ACTINOPTERYGII	CYPRINIFORMES	CYPRINIDAE	Garra rakhinica	I	NT
ANIMALIA	CHORDATA	ACTINOPTERYGII	CYPRINIFORMES	CYPRINIDAE	Garra regressus	I	VU
ANIMALIA	CHORDATA	ACTINOPTERYGII	CYPRINIFORMES	CYPRINIDAE	Garra rupicola	U	NT
ANIMALIA	CHORDATA	ACTINOPTERYGII	CYPRINIFORMES	CYPRINIDAE	Garra smartae	I	VU
ANIMALIA	CHORDATA	ACTINOPTERYGII	CYPRINIFORMES	CYPRINIDAE	Garra spilota	I	NT
ANIMALIA	CHORDATA	ACTINOPTERYGII	CYPRINIFORMES	CYPRINIDAE	Garra surendranathanii	I	EN
ANIMALIA	CHORDATA	ACTINOPTERYGII	CYPRINIFORMES	CYPRINIDAE	Garra tana	I	VU
ANIMALIA	CHORDATA	ACTINOPTERYGII	CYPRINIFORMES	CYPRINIDAE	Garra trewavasae	U	CR
ANIMALIA	CHORDATA	ACTINOPTERYGII	CYPRINIFORMES	CYPRINIDAE	Garra vittatula	I	NT
ANIMALIA	CHORDATA	ACTINOPTERYGII	CYPRINIFORMES	CYPRINIDAE	Garra widdowsoni	U	CR
ANIMALIA	CHORDATA	ACTINOPTERYGII	CYPRINIFORMES	CYPRINIDAE	Gila cypha	U	EN
ANIMALIA	CHORDATA	ACTINOPTERYGII	CYPRINIFORMES	CYPRINIDAE	Gila eremica	U	NT
ANIMALIA	CHORDATA	ACTINOPTERYGII	CYPRINIFORMES	CYPRINIDAE	Gila modesta	I	EN
ANIMALIA	CHORDATA	ACTINOPTERYGII	CYPRINIFORMES	CYPRINIDAE	Gila nigrescens	U	VU
ANIMALIA	CHORDATA	ACTINOPTERYGII	CYPRINIFORMES	CYPRINIDAE	Gila robusta	I	VU
ANIMALIA	CHORDATA	ACTINOPTERYGII	CYPRINIFORMES	CYPRINIDAE	Gnathopogon caerulescens	U	EN
ANIMALIA	CHORDATA	ACTINOPTERYGII	CYPRINIFORMES	CYPRINIDAE	Gobio maeandricus	U	EN
ANIMALIA	CHORDATA	ACTINOPTERYGII	CYPRINIFORMES	CYPRINIDAE	Gymnocypris dobula	U	VU
ANIMALIA	CHORDATA	ACTINOPTERYGII	CYPRINIFORMES	CYPRINIDAE	Gymnocypris scleracanthus	U	VU
ANIMALIA	CHORDATA	ACTINOPTERYGII	CYPRINIFORMES	CYPRINIDAE	Gymnostomus horai	U	EN
ANIMALIA	CHORDATA	ACTINOPTERYGII	CYPRINIFORMES	CYPRINIDAE	Horadandia atukorali	I	VU
ANIMALIA	CHORDATA	ACTINOPTERYGII	CYPRINIFORMES	CYPRINIDAE	Horalabiosa arunachalami	U	CR
ANIMALIA	CHORDATA	ACTINOPTERYGII	CYPRINIFORMES	CYPRINIDAE	Horalabiosa joshuai	U	EN
ANIMALIA	CHORDATA	ACTINOPTERYGII	CYPRINIFORMES	CYPRINIDAE	Hybognathus amarus	U	EN
ANIMALIA	CHORDATA	ACTINOPTERYGII	CYPRINIFORMES	CYPRINIDAE	Hypophthalmichthys molitrix	I	NT
ANIMALIA	CHORDATA	ACTINOPTERYGII	CYPRINIFORMES	CYPRINIDAE	Hypselobarbus curmuca	L	EN
ANIMALIA	CHORDATA	ACTINOPTERYGII	CYPRINIFORMES	CYPRINIDAE	Hypselobarbus dubius	U	EN
ANIMALIA	CHORDATA	ACTINOPTERYGII	CYPRINIFORMES	CYPRINIDAE	Hypselobarbus kolus	U	VU
ANIMALIA	CHORDATA	ACTINOPTERYGII	CYPRINIFORMES	CYPRINIDAE	Hypselobarbus micropogon	U	EN
ANIMALIA	CHORDATA	ACTINOPTERYGII	CYPRINIFORMES	CYPRINIDAE	Hypselobarbus mussullah	U	EN
ANIMALIA	CHORDATA	ACTINOPTERYGII	CYPRINIFORMES	CYPRINIDAE	Hypselobarbus periyarensis	U	EN
ANIMALIA	CHORDATA	ACTINOPTERYGII	CYPRINIFORMES	CYPRINIDAE	Hypselobarbus pulchellus	U	CR
ANIMALIA	CHORDATA	ACTINOPTERYGII	CYPRINIFORMES	CYPRINIDAE	Hypselobarbus thomassi	I	CR
ANIMALIA	CHORDATA	ACTINOPTERYGII	CYPRINIFORMES	CYPRINIDAE	Hypsibarbus lagleri	U	VU
ANIMALIA	CHORDATA	ACTINOPTERYGII	CYPRINIFORMES	CYPRINIDAE	Iberochondrostoma oretanum	U	CR
ANIMALIA	CHORDATA	ACTINOPTERYGII	CYPRINIFORMES	CYPRINIDAE	Iberocypris palaciosi	U	CR
ANIMALIA	CHORDATA	ACTINOPTERYGII	CYPRINIFORMES	CYPRINIDAE	Labeo alluaudi	U	EN
ANIMALIA	CHORDATA	ACTINOPTERYGII	CYPRINIFORMES	CYPRINIDAE	Labeo curriei	U	CR
ANIMALIA	CHORDATA	ACTINOPTERYGII	CYPRINIFORMES	CYPRINIDAE	Labeo fisheri	U	EN
ANIMALIA	CHORDATA	ACTINOPTERYGII	CYPRINIFORMES	CYPRINIDAE	Labeo lankae	U	EN
ANIMALIA	CHORDATA	ACTINOPTERYGII	CYPRINIFORMES	CYPRINIDAE	Labeo mesops	U	CR
ANIMALIA	CHORDATA	ACTINOPTERYGII	CYPRINIFORMES	CYPRINIDAE	Labeo nandina	U	NT
ANIMALIA	CHORDATA	ACTINOPTERYGII	CYPRINIFORMES	CYPRINIDAE	Labeo pangusia	U	NT
ANIMALIA	CHORDATA	ACTINOPTERYGII	CYPRINIFORMES	CYPRINIDAE	Labeo pierrei	U	VU
ANIMALIA	CHORDATA	ACTINOPTERYGII	CYPRINIFORMES	CYPRINIDAE	Labeo potail	U	EN
ANIMALIA	CHORDATA	ACTINOPTERYGII	CYPRINIFORMES	CYPRINIDAE	Labeo rectipinnis	U	VU
ANIMALIA	CHORDATA	ACTINOPTERYGII	CYPRINIFORMES	CYPRINIDAE	Labeo seeberi	U	EN
ANIMALIA	CHORDATA	ACTINOPTERYGII	CYPRINIFORMES	CYPRINIDAE	Labeo victorianus	U	CR
ANIMALIA	CHORDATA	ACTINOPTERYGII	CYPRINIFORMES	CYPRINIDAE	Labeobarbus acuticeps	U	NT
ANIMALIA	CHORDATA	ACTINOPTERYGII	CYPRINIFORMES	CYPRINIDAE	Labeobarbus acutirostris	U	VU
ANIMALIA	CHORDATA	ACTINOPTERYGII	CYPRINIFORMES	CYPRINIDAE	Labeobarbus claudinae	U	VU
ANIMALIA	CHORDATA	ACTINOPTERYGII	CYPRINIFORMES	CYPRINIDAE	Labeobarbus gorguari	U	VU
ANIMALIA	CHORDATA	ACTINOPTERYGII	CYPRINIFORMES	CYPRINIDAE	Labeobarbus gruveli	U	VU
ANIMALIA	CHORDATA	ACTINOPTERYGII	CYPRINIFORMES	CYPRINIDAE	Labeobarbus kimberleyensis	U	NT
ANIMALIA	CHORDATA	ACTINOPTERYGII	CYPRINIFORMES	CYPRINIDAE	Labeobarbus macrolepis	I	NT
ANIMALIA	CHORDATA	ACTINOPTERYGII	CYPRINIFORMES	CYPRINIDAE	Labeobarbus macrophtalmus	I	EN
ANIMALIA	CHORDATA	ACTINOPTERYGII	CYPRINIFORMES	CYPRINIDAE	Labeobarbus mbami	I	EN
ANIMALIA	CHORDATA	ACTINOPTERYGII	CYPRINIFORMES	CYPRINIDAE	Labeobarbus nelspruitensis	U	NT
ANIMALIA	CHORDATA	ACTINOPTERYGII	CYPRINIFORMES	CYPRINIDAE	Labeobarbus osseensis	U	VU
ANIMALIA	CHORDATA	ACTINOPTERYGII	CYPRINIFORMES	CYPRINIDAE	Labeobarbus parawaldroni	U	NT
ANIMALIA	CHORDATA	ACTINOPTERYGII	CYPRINIFORMES	CYPRINIDAE	Labeobarbus platydorsus	U	VU
ANIMALIA	CHORDATA	ACTINOPTERYGII	CYPRINIFORMES	CYPRINIDAE	Labeobarbus roylii	U	EN
ANIMALIA	CHORDATA	ACTINOPTERYGII	CYPRINIFORMES	CYPRINIDAE	Labeobarbus ruasae	I	CR
ANIMALIA	CHORDATA	ACTINOPTERYGII	CYPRINIFORMES	CYPRINIDAE	Labeobarbus seeberi	U	NT
ANIMALIA	CHORDATA	ACTINOPTERYGII	CYPRINIFORMES	CYPRINIDAE	Laubuka caeruleostigmata	I	EN
ANIMALIA	CHORDATA	ACTINOPTERYGII	CYPRINIFORMES	CYPRINIDAE	Laubuka fasciata	I	VU
ANIMALIA	CHORDATA	ACTINOPTERYGII	CYPRINIFORMES	CYPRINIDAE	Laubuka insularis	I	EN
ANIMALIA	CHORDATA	ACTINOPTERYGII	CYPRINIFORMES	CYPRINIDAE	Laubuka khujairokensis	U	VU
ANIMALIA	CHORDATA	ACTINOPTERYGII	CYPRINIFORMES	CYPRINIDAE	Laubuka varuna	U	EN
ANIMALIA	CHORDATA	ACTINOPTERYGII	CYPRINIFORMES	CYPRINIDAE	Lepidomeda albivallis	U	CR
ANIMALIA	CHORDATA	ACTINOPTERYGII	CYPRINIFORMES	CYPRINIDAE	Lepidomeda copei	U	NT
ANIMALIA	CHORDATA	ACTINOPTERYGII	CYPRINIFORMES	CYPRINIDAE	Lepidomeda mollispinis	U	VU
ANIMALIA	CHORDATA	ACTINOPTERYGII	CYPRINIFORMES	CYPRINIDAE	Lepidomeda vittata	U	EN
ANIMALIA	CHORDATA	ACTINOPTERYGII	CYPRINIFORMES	CYPRINIDAE	Lepidopygopsis typus	U	EN
ANIMALIA	CHORDATA	ACTINOPTERYGII	CYPRINIFORMES	CYPRINIDAE	Leptobarbus melanopterus	L	NT
ANIMALIA	CHORDATA	ACTINOPTERYGII	CYPRINIFORMES	CYPRINIDAE	Leptocypris crossensis	U	VU
ANIMALIA	CHORDATA	ACTINOPTERYGII	CYPRINIFORMES	CYPRINIDAE	Leptocypris guineensis	U	NT
ANIMALIA	CHORDATA	ACTINOPTERYGII	CYPRINIFORMES	CYPRINIDAE	Leptocypris konkoureensis	U	VU
ANIMALIA	CHORDATA	ACTINOPTERYGII	CYPRINIFORMES	CYPRINIDAE	Leptocypris taiaensis	U	VU
ANIMALIA	CHORDATA	ACTINOPTERYGII	CYPRINIFORMES	CYPRINIDAE	Lobocheilos falcifer	U	VU
ANIMALIA	CHORDATA	ACTINOPTERYGII	CYPRINIFORMES	CYPRINIDAE	Luciobarbus brachycephalus	U	VU
ANIMALIA	CHORDATA	ACTINOPTERYGII	CYPRINIFORMES	CYPRINIDAE	Luciobarbus capito	U	VU
ANIMALIA	CHORDATA	ACTINOPTERYGII	CYPRINIFORMES	CYPRINIDAE	Luciobarbus comizo	I	VU
ANIMALIA	CHORDATA	ACTINOPTERYGII	CYPRINIFORMES	CYPRINIDAE	Luciobarbus esocinus	U	VU
ANIMALIA	CHORDATA	ACTINOPTERYGII	CYPRINIFORMES	CYPRINIDAE	Luciobarbus graecus	I	EN
ANIMALIA	CHORDATA	ACTINOPTERYGII	CYPRINIFORMES	CYPRINIDAE	Luciobarbus subquincunciatus	U	CR
ANIMALIA	CHORDATA	ACTINOPTERYGII	CYPRINIFORMES	CYPRINIDAE	Luciocyprinus langsoni	U	VU
ANIMALIA	CHORDATA	ACTINOPTERYGII	CYPRINIFORMES	CYPRINIDAE	Luciocyprinus striolatus	U	EN
ANIMALIA	CHORDATA	ACTINOPTERYGII	CYPRINIFORMES	CYPRINIDAE	Meda fulgida	U	EN
ANIMALIA	CHORDATA	ACTINOPTERYGII	CYPRINIFORMES	CYPRINIDAE	Mekongina erythrospila	U	NT
ANIMALIA	CHORDATA	ACTINOPTERYGII	CYPRINIFORMES	CYPRINIDAE	Mesopotamichthys sharpeyi	U	VU
ANIMALIA	CHORDATA	ACTINOPTERYGII	CYPRINIFORMES	CYPRINIDAE	Microrasbora rubescens	L	EN
ANIMALIA	CHORDATA	ACTINOPTERYGII	CYPRINIFORMES	CYPRINIDAE	Mystacoleucus lepturus	U	VU
ANIMALIA	CHORDATA	ACTINOPTERYGII	CYPRINIFORMES	CYPRINIDAE	Neolissochilus blanci	I	NT
ANIMALIA	CHORDATA	ACTINOPTERYGII	CYPRINIFORMES	CYPRINIDAE	Neolissochilus hendersoni	I	VU
ANIMALIA	CHORDATA	ACTINOPTERYGII	CYPRINIFORMES	CYPRINIDAE	Neolissochilus hexagonolepis	U	NT
ANIMALIA	CHORDATA	ACTINOPTERYGII	CYPRINIFORMES	CYPRINIDAE	Neolissochilus hexastichus	U	NT
ANIMALIA	CHORDATA	ACTINOPTERYGII	CYPRINIFORMES	CYPRINIDAE	Neolissochilus subterraneus	I	VU
ANIMALIA	CHORDATA	ACTINOPTERYGII	CYPRINIFORMES	CYPRINIDAE	Notropis aguirrepequenoi	I	VU
ANIMALIA	CHORDATA	ACTINOPTERYGII	CYPRINIFORMES	CYPRINIDAE	Notropis boucardi	U	EN
ANIMALIA	CHORDATA	ACTINOPTERYGII	CYPRINIFORMES	CYPRINIDAE	Notropis buccula	U	VU
ANIMALIA	CHORDATA	ACTINOPTERYGII	CYPRINIFORMES	CYPRINIDAE	Notropis calabazas	U	CR
ANIMALIA	CHORDATA	ACTINOPTERYGII	CYPRINIFORMES	CYPRINIDAE	Notropis calientis	U	CR
ANIMALIA	CHORDATA	ACTINOPTERYGII	CYPRINIFORMES	CYPRINIDAE	Notropis cumingii	I	NT
ANIMALIA	CHORDATA	ACTINOPTERYGII	CYPRINIFORMES	CYPRINIDAE	Notropis girardi	U	VU
ANIMALIA	CHORDATA	ACTINOPTERYGII	CYPRINIFORMES	CYPRINIDAE	Notropis grandis	I	EN
ANIMALIA	CHORDATA	ACTINOPTERYGII	CYPRINIFORMES	CYPRINIDAE	Notropis marhabatiensis	U	CR
ANIMALIA	CHORDATA	ACTINOPTERYGII	CYPRINIFORMES	CYPRINIDAE	Notropis oxyrhynchus	U	VU
ANIMALIA	CHORDATA	ACTINOPTERYGII	CYPRINIFORMES	CYPRINIDAE	Notropis simus	U	EN
ANIMALIA	CHORDATA	ACTINOPTERYGII	CYPRINIFORMES	CYPRINIDAE	Notropis tropicus	U	NT
ANIMALIA	CHORDATA	ACTINOPTERYGII	CYPRINIFORMES	CYPRINIDAE	Opsaridium microlepis	U	VU
ANIMALIA	CHORDATA	ACTINOPTERYGII	CYPRINIFORMES	CYPRINIDAE	Osteobrama belangeri	U	NT
ANIMALIA	CHORDATA	ACTINOPTERYGII	CYPRINIFORMES	CYPRINIDAE	Osteochilus longidorsalis	I	EN
ANIMALIA	CHORDATA	ACTINOPTERYGII	CYPRINIFORMES	CYPRINIDAE	Osteochilus partilineatus	I	NT
ANIMALIA	CHORDATA	ACTINOPTERYGII	CYPRINIFORMES	CYPRINIDAE	Oxygaster pointoni	U	VU
ANIMALIA	CHORDATA	ACTINOPTERYGII	CYPRINIFORMES	CYPRINIDAE	Oxygymnocypris stewartii	U	NT
ANIMALIA	CHORDATA	ACTINOPTERYGII	CYPRINIFORMES	CYPRINIDAE	Paedocypris micromegethes	L	VU
ANIMALIA	CHORDATA	ACTINOPTERYGII	CYPRINIFORMES	CYPRINIDAE	Paedocypris progenetica	L	NT
ANIMALIA	CHORDATA	ACTINOPTERYGII	CYPRINIFORMES	CYPRINIDAE	Parachela cyanea	I	NT
ANIMALIA	CHORDATA	ACTINOPTERYGII	CYPRINIFORMES	CYPRINIDAE	Parapsilorhynchus discophorus	U	VU
ANIMALIA	CHORDATA	ACTINOPTERYGII	CYPRINIFORMES	CYPRINIDAE	Parapsilorhynchus elongatus	I	EN
ANIMALIA	CHORDATA	ACTINOPTERYGII	CYPRINIFORMES	CYPRINIDAE	Pectenocypris micromysticetus	L	NT
ANIMALIA	CHORDATA	ACTINOPTERYGII	CYPRINIFORMES	CYPRINIDAE	Percocypris pingi	U	NT
ANIMALIA	CHORDATA	ACTINOPTERYGII	CYPRINIFORMES	CYPRINIDAE	Pethia atra	U	VU
ANIMALIA	CHORDATA	ACTINOPTERYGII	CYPRINIFORMES	CYPRINIDAE	Pethia bandula	U	CR
ANIMALIA	CHORDATA	ACTINOPTERYGII	CYPRINIFORMES	CYPRINIDAE	Pethia cumingii	L	EN
ANIMALIA	CHORDATA	ACTINOPTERYGII	CYPRINIFORMES	CYPRINIDAE	Pethia khugae	I	VU
ANIMALIA	CHORDATA	ACTINOPTERYGII	CYPRINIFORMES	CYPRINIDAE	Pethia manipurensis	U	EN
ANIMALIA	CHORDATA	ACTINOPTERYGII	CYPRINIFORMES	CYPRINIDAE	Pethia nigrofasciata	L	VU
ANIMALIA	CHORDATA	ACTINOPTERYGII	CYPRINIFORMES	CYPRINIDAE	Pethia ornata	U	VU
ANIMALIA	CHORDATA	ACTINOPTERYGII	CYPRINIFORMES	CYPRINIDAE	Pethia reval	L	EN
ANIMALIA	CHORDATA	ACTINOPTERYGII	CYPRINIFORMES	CYPRINIDAE	Pethia setnai	I	VU
ANIMALIA	CHORDATA	ACTINOPTERYGII	CYPRINIFORMES	CYPRINIDAE	Pethia sharmai	I	EN
ANIMALIA	CHORDATA	ACTINOPTERYGII	CYPRINIFORMES	CYPRINIDAE	Pethia tiantian	I	NT
ANIMALIA	CHORDATA	ACTINOPTERYGII	CYPRINIFORMES	CYPRINIDAE	Pethia yuensis	I	VU
ANIMALIA	CHORDATA	ACTINOPTERYGII	CYPRINIFORMES	CYPRINIDAE	Phoxinus strymonicus	U	EN
ANIMALIA	CHORDATA	ACTINOPTERYGII	CYPRINIFORMES	CYPRINIDAE	Poropuntius bolovenensis	U	EN
ANIMALIA	CHORDATA	ACTINOPTERYGII	CYPRINIFORMES	CYPRINIDAE	Poropuntius chonglingchungi	I	CR
ANIMALIA	CHORDATA	ACTINOPTERYGII	CYPRINIFORMES	CYPRINIDAE	Poropuntius clavatus	I	NT
ANIMALIA	CHORDATA	ACTINOPTERYGII	CYPRINIFORMES	CYPRINIDAE	Poropuntius consternans	U	EN
ANIMALIA	CHORDATA	ACTINOPTERYGII	CYPRINIFORMES	CYPRINIDAE	Poropuntius deauratus	U	EN
ANIMALIA	CHORDATA	ACTINOPTERYGII	CYPRINIFORMES	CYPRINIDAE	Poropuntius lobocheiloides	U	EN
ANIMALIA	CHORDATA	ACTINOPTERYGII	CYPRINIFORMES	CYPRINIDAE	Poropuntius solitus	U	EN
ANIMALIA	CHORDATA	ACTINOPTERYGII	CYPRINIFORMES	CYPRINIDAE	Poropuntius speleops	U	VU
ANIMALIA	CHORDATA	ACTINOPTERYGII	CYPRINIFORMES	CYPRINIDAE	Probarbus jullieni	L	CR
ANIMALIA	CHORDATA	ACTINOPTERYGII	CYPRINIFORMES	CYPRINIDAE	Probarbus labeamajor	L	EN
ANIMALIA	CHORDATA	ACTINOPTERYGII	CYPRINIFORMES	CYPRINIDAE	Probarbus labeaminor	I	NT
ANIMALIA	CHORDATA	ACTINOPTERYGII	CYPRINIFORMES	CYPRINIDAE	Pseudobarbus asper	U	VU
ANIMALIA	CHORDATA	ACTINOPTERYGII	CYPRINIFORMES	CYPRINIDAE	Pseudobarbus burchelli	U	CR
ANIMALIA	CHORDATA	ACTINOPTERYGII	CYPRINIFORMES	CYPRINIDAE	Pseudobarbus calidus	I	NT
ANIMALIA	CHORDATA	ACTINOPTERYGII	CYPRINIFORMES	CYPRINIDAE	Pseudobarbus capensis	I	EN
ANIMALIA	CHORDATA	ACTINOPTERYGII	CYPRINIFORMES	CYPRINIDAE	Pseudobarbus erubescens	U	CR
ANIMALIA	CHORDATA	ACTINOPTERYGII	CYPRINIFORMES	CYPRINIDAE	Pseudobarbus phlegethon	I	EN
ANIMALIA	CHORDATA	ACTINOPTERYGII	CYPRINIFORMES	CYPRINIDAE	Pseudobarbus serra	I	NT
ANIMALIA	CHORDATA	ACTINOPTERYGII	CYPRINIFORMES	CYPRINIDAE	Pseudobarbus skeltoni	U	EN
ANIMALIA	CHORDATA	ACTINOPTERYGII	CYPRINIFORMES	CYPRINIDAE	Pseudobarbus tenuis	U	NT
ANIMALIA	CHORDATA	ACTINOPTERYGII	CYPRINIFORMES	CYPRINIDAE	Pseudobarbus verloreni	I	EN
ANIMALIA	CHORDATA	ACTINOPTERYGII	CYPRINIFORMES	CYPRINIDAE	Pseudochondrostoma willkommii	I	VU
ANIMALIA	CHORDATA	ACTINOPTERYGII	CYPRINIFORMES	CYPRINIDAE	Pseudohemiculter dispar	U	VU
ANIMALIA	CHORDATA	ACTINOPTERYGII	CYPRINIFORMES	CYPRINIDAE	Pseudophoxinus evliyae	U	EN
ANIMALIA	CHORDATA	ACTINOPTERYGII	CYPRINIFORMES	CYPRINIDAE	Pseudophoxinus hasani	U	CR
ANIMALIA	CHORDATA	ACTINOPTERYGII	CYPRINIFORMES	CYPRINIDAE	Pseudophoxinus maeandri	U	EN
ANIMALIA	CHORDATA	ACTINOPTERYGII	CYPRINIFORMES	CYPRINIDAE	Pseudorasbora pugnax	U	VU
ANIMALIA	CHORDATA	ACTINOPTERYGII	CYPRINIFORMES	CYPRINIDAE	Pteronotropis hubbsi	I	NT
[truncated: 19,746 more rows]
